# Supplementary material
Source: MDPI journal article supplement (https://www.mdpi.com/search?q=marinedrugs-17-00266)
Supplement: s001 [file marinedrugs-17-00266-s001.pdf]

# **Curdepsidones B-G, Six Depsidones with Anti-inflammatory Activities from the Marine-Derived Fungus *Curvularia* sp. IFB-Z10**

Yi Ding<sup>1,†</sup>, Faliang An<sup>1,†</sup>, Xiaojing Zhu<sup>1</sup>, Haiyuan Yu<sup>1</sup>, Liling Hao<sup>1,\*</sup> and Yanhua Lu<sup>1,\*</sup>

<sup>1</sup> State Key Laboratory of Bioreactor Engineering, East China University of Science and Technology, 130 Mei Long Road, Shanghai 200237, People's Republic of China

\* Corresponding author: E-mail address: [holiday\\_hao1988@126.com](mailto:holiday_hao1988@126.com); Tel.: +86-2164253823 (L.H.); [luyanhua@ecust.edu.cn](mailto:luyanhua@ecust.edu.cn) (Y.L.); Tel +86-2164251185.

† These authors equally contribute to this work.

# Supporting Information

## Table of contents

|                                                                                                     |    |
|-----------------------------------------------------------------------------------------------------|----|
| <b>Figure S1.</b> $^1\text{H}$ NMR spectra (500 MHz, $\text{CDCl}_3$ ) of <b>1</b> .....            | 4  |
| <b>Figure S2.</b> $^{13}\text{C}$ NMR spectra (125 MHz, $\text{CDCl}_3$ ) of <b>1</b> .....         | 5  |
| <b>Figure S3.</b> HSQC spectra ( $\text{CDCl}_3$ ) of <b>1</b> .....                                | 5  |
| <b>Figure S4.</b> HMBC spectra ( $\text{CDCl}_3$ ) of <b>1</b> .....                                | 6  |
| <b>Figure S5.</b> ROSEY spectra ( $\text{CDCl}_3$ ) of <b>1</b> .....                               | 7  |
| <b>Figure S6.</b> UV spectra (MeOH) of <b>1</b> .....                                               | 7  |
| <b>Figure S7.</b> ECD spectra (MeOH) of <b>1</b> .....                                              | 7  |
| <b>Figure S8.</b> HRESIMS spectra of <b>1</b> .....                                                 | 8  |
| <b>Figure S9.</b> $^1\text{H}$ NMR spectra (500 MHz, $\text{CDCl}_3$ ) of <b>2</b> .....            | 8  |
| <b>Figure S10.</b> $^{13}\text{C}$ NMR spectra (125 MHz, $\text{CDCl}_3$ ) of <b>2</b> .....        | 9  |
| <b>Figure S11.</b> HMQC spectra ( $\text{CDCl}_3$ ) of <b>2</b> .....                               | 9  |
| <b>Figure S12.</b> HMBC spectra ( $\text{CDCl}_3$ ) of <b>2</b> .....                               | 10 |
| <b>Figure S13.</b> UV spectra (MeOH) of <b>2</b> .....                                              | 10 |
| <b>Figure S14.</b> ECD spectra (MeOH) of <b>2</b> .....                                             | 11 |
| <b>Figure S15.</b> HRESIMS spectra of <b>2</b> .....                                                | 11 |
| <b>Figure S16.</b> $^1\text{H}$ NMR spectra (500 MHz, $\text{CDCl}_3$ ) of <b>3</b> .....           | 12 |
| <b>Figure S17.</b> $^{13}\text{C}$ NMR spectra (125 MHz, $\text{CDCl}_3$ ) of <b>3</b> .....        | 12 |
| <b>Figure S18.</b> HSQC spectra ( $\text{CDCl}_3$ ) of <b>3</b> .....                               | 13 |
| <b>Figure S19.</b> HMBC spectra ( $\text{CDCl}_3$ ) of <b>3</b> .....                               | 13 |
| <b>Figure S20.</b> UV spectra (MeOH) of <b>3</b> .....                                              | 14 |
| <b>Figure S21.</b> ECD spectra (MeOH) of <b>3</b> .....                                             | 14 |
| <b>Figure S22.</b> HRESIMS spectra of <b>3</b> .....                                                | 15 |
| <b>Figure S23.</b> $^1\text{H}$ NMR spectra (500 MHz, $\text{CDCl}_3$ ) of <b>4</b> .....           | 15 |
| <b>Figure S24.</b> $^{13}\text{C}$ NMR spectra (125 MHz, $\text{CDCl}_3$ ) of <b>4</b> .....        | 16 |
| <b>Figure S25.</b> HSQC spectra ( $\text{CDCl}_3$ ) of <b>4</b> .....                               | 16 |
| <b>Figure S26.</b> HMBC spectra ( $\text{CDCl}_3$ ) of <b>4</b> .....                               | 17 |
| <b>Figure S27.</b> UV spectra (MeOH) of <b>4</b> .....                                              | 17 |
| <b>Figure S28.</b> ECD spectra (MeOH) of <b>4</b> .....                                             | 18 |
| <b>Figure S29.</b> HRESIMS spectra of <b>4</b> .....                                                | 18 |
| <b>Figure S30.</b> $^1\text{H}$ NMR spectra (500 MHz, $\text{CD}_3\text{OD}$ ) of <b>5</b> .....    | 19 |
| <b>Figure S31.</b> $^{13}\text{C}$ NMR spectra (125 MHz, $\text{CD}_3\text{OD}$ ) of <b>5</b> ..... | 19 |
| <b>Figure S32.</b> HSQC spectra ( $\text{CD}_3\text{OD}$ ) of <b>5</b> .....                        | 20 |

|                                                                                                                                                                        |    |
|------------------------------------------------------------------------------------------------------------------------------------------------------------------------|----|
| <b>Figure S33.</b> HMBC spectra (CD <sub>3</sub> OD) of <b>5</b> .                                                                                                     | 20 |
| <b>Figure S34.</b> UV spectra (MeOH) of <b>5</b> .                                                                                                                     | 21 |
| <b>Figure S35.</b> ECD spectra (MeOH) of <b>5</b> .                                                                                                                    | 21 |
| <b>Figure S36.</b> HRESIMS spectra of <b>5</b> .                                                                                                                       | 22 |
| <b>Figure S37.</b> <sup>1</sup> H NMR spectra (500 MHz, CDCl <sub>3</sub> ) of <b>6</b> .                                                                              | 22 |
| <b>Figure S38.</b> <sup>13</sup> C NMR spectra (125 MHz, CDCl <sub>3</sub> ) of <b>6</b> .                                                                             | 23 |
| <b>Figure S39.</b> HSQC spectra (CDCl <sub>3</sub> ) of <b>6</b> .                                                                                                     | 23 |
| <b>Figure S40.</b> HMBC spectra (CDCl <sub>3</sub> ) of <b>6</b> .                                                                                                     | 24 |
| <b>Figure S41.</b> UV spectra (MeOH) of <b>6</b> .                                                                                                                     | 24 |
| <b>Figure S42.</b> ECD spectra (MeOH) of <b>6</b> .                                                                                                                    | 25 |
| <b>Figure S43.</b> HRESIMS spectra of <b>6</b> .                                                                                                                       | 25 |
| <b>Figure S44.</b> Chemical structure of undetermined relative configurations of compounds <b>I</b> , <b>II</b> and <b>III</b> (enantiomers not shown).                | 26 |
| <b>Table S1.</b> Energies of conformers at MMFF94x force field.                                                                                                        | 26 |
| <b>Table S2.</b> Energies of compounds <b>I</b> , <b>II</b> and <b>III</b> at B3LYP/6-311G (d, p) in gas phase.                                                        | 32 |
| <b>Table S3.</b> Standard orientations of compounds <b>I</b> , <b>II</b> and <b>III</b> at B3LYP/6-311G (d, p) level in gas phase.                                     | 33 |
| <b>Table S4.</b> Experimental ( <b>1</b> and <b>2</b> ) and computed (a and b) <sup>13</sup> C-NMR chemical shifts.                                                    | 51 |
| <b>Table S5.</b> Experimental ( <b>1</b> and <b>2</b> ) and computed (a and b) <sup>1</sup> H-NMR chemical shifts.                                                     | 52 |
| <b>Table S6.</b> Statistics of Ordinary Least Squares Linear Regression (OLS-LR) of experimental and computed <sup>13</sup> C- and <sup>1</sup> H-NMR chemical shifts. | 53 |

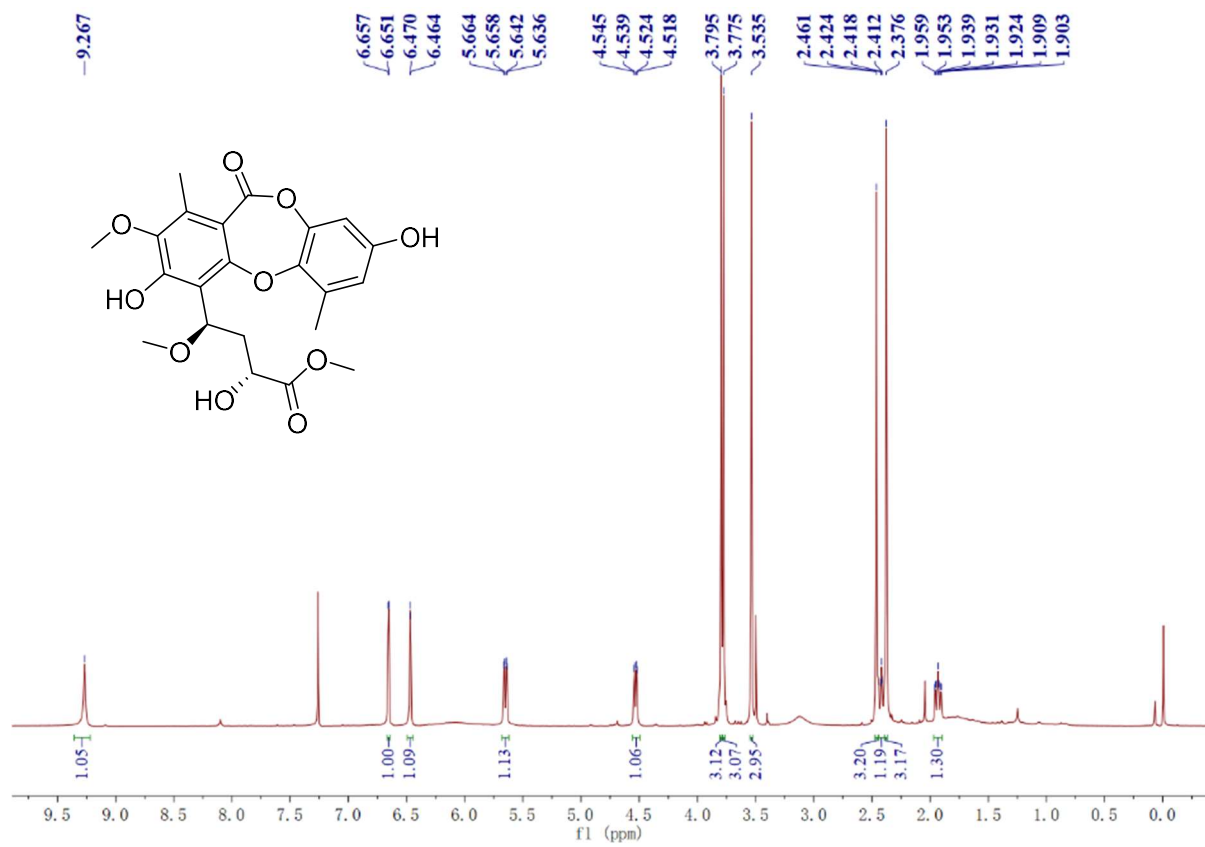

Figure S1. <sup>1</sup>H NMR spectra (500 MHz, CDCl<sub>3</sub>) of 1.

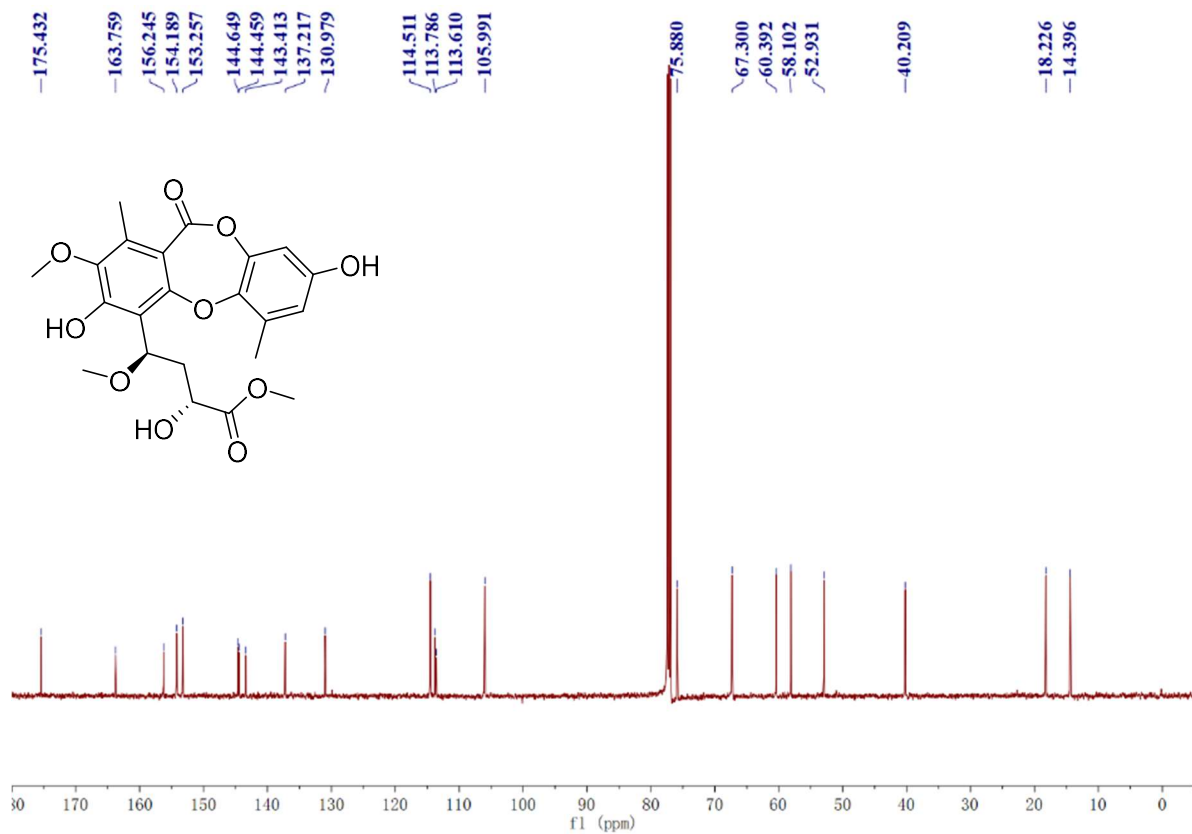

Figure S2.  $^{13}\text{C}$ NMR spectra (125 MHz,  $\text{CDCl}_3$ ) of 1.

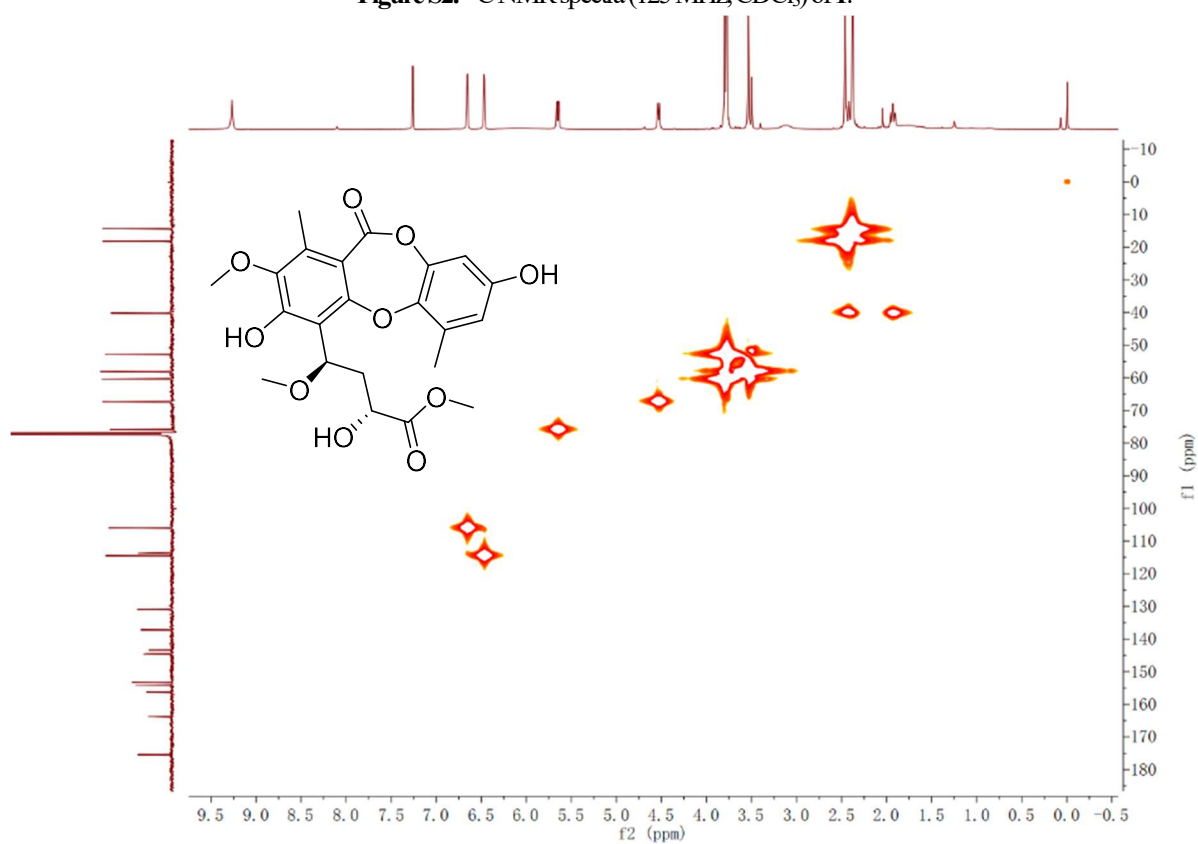

Figure S3. HSQC spectra ( $\text{CDCl}_3$ ) of 1.

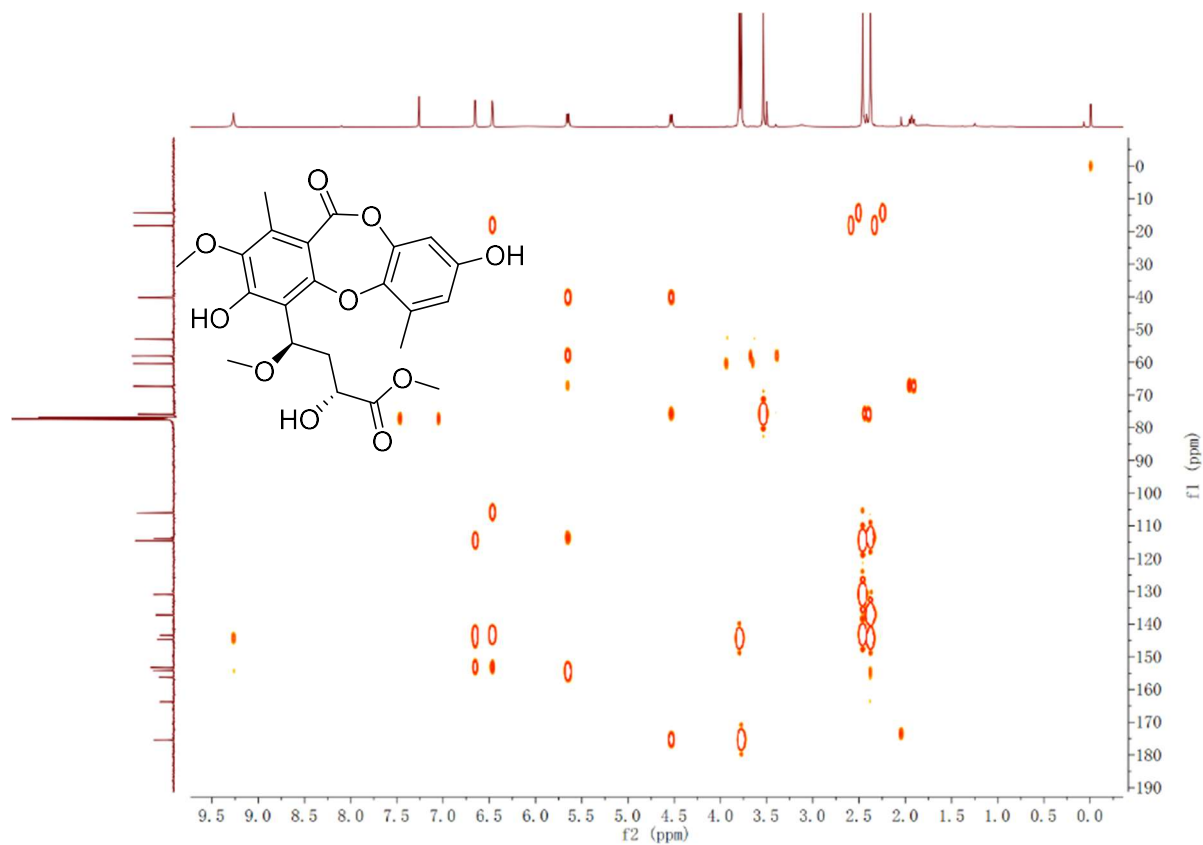

**Figure S4.** HMBC spectra (CDCl<sub>3</sub>) of **1**.

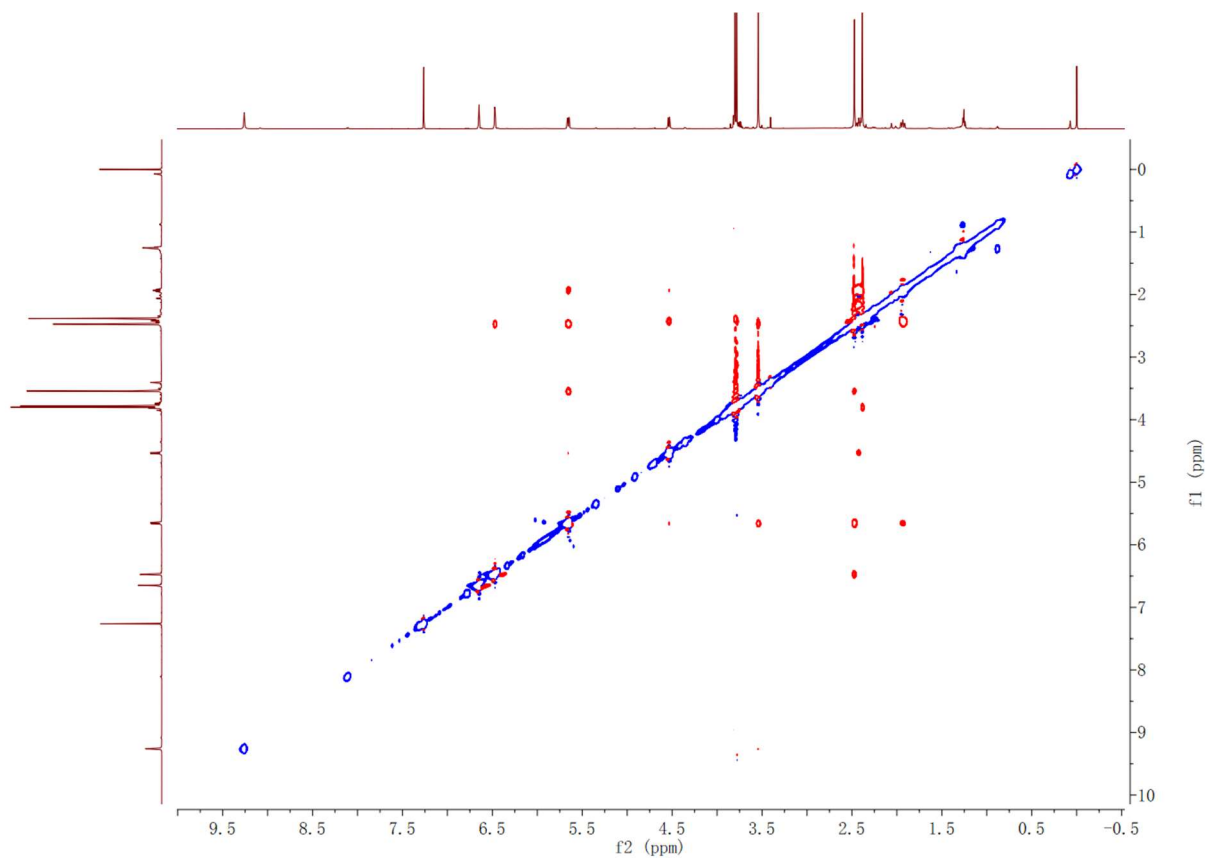

Figure S5. ROSEY spectra (CDCl<sub>3</sub>) of 1.

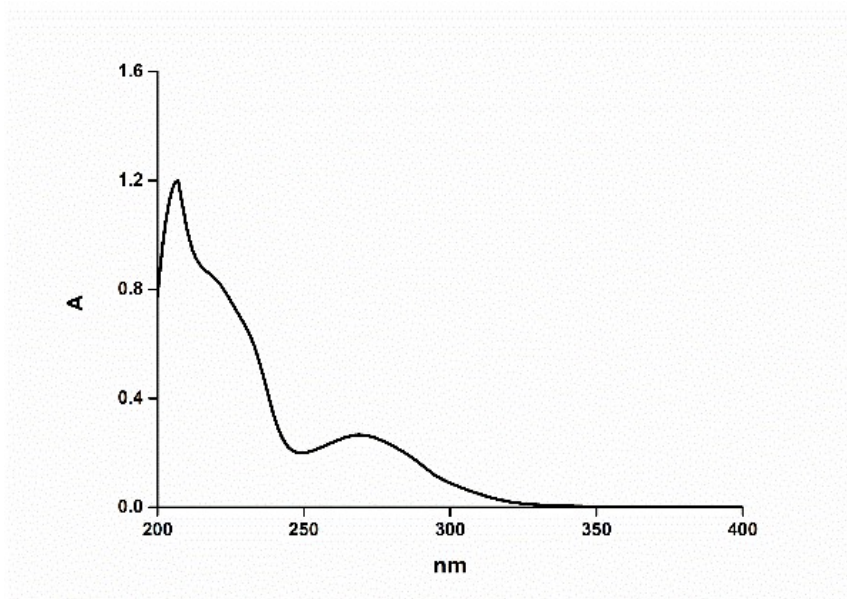

Figure S6. UV spectra (MeOH) of 1.

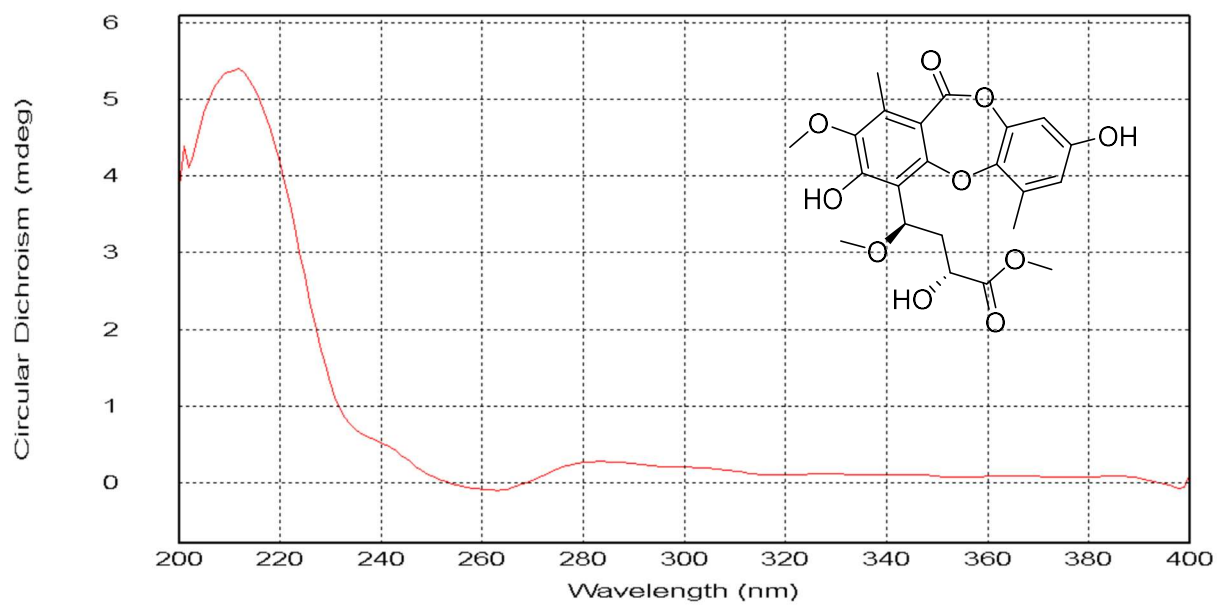

Figure S7. ECD spectra (MeOH) of 1.



D-1-B #734 RT: 7.55 AV: 1 NL: 1.16E10  
T: FTMS - p ESI Full ms [150.0000-750.0000]

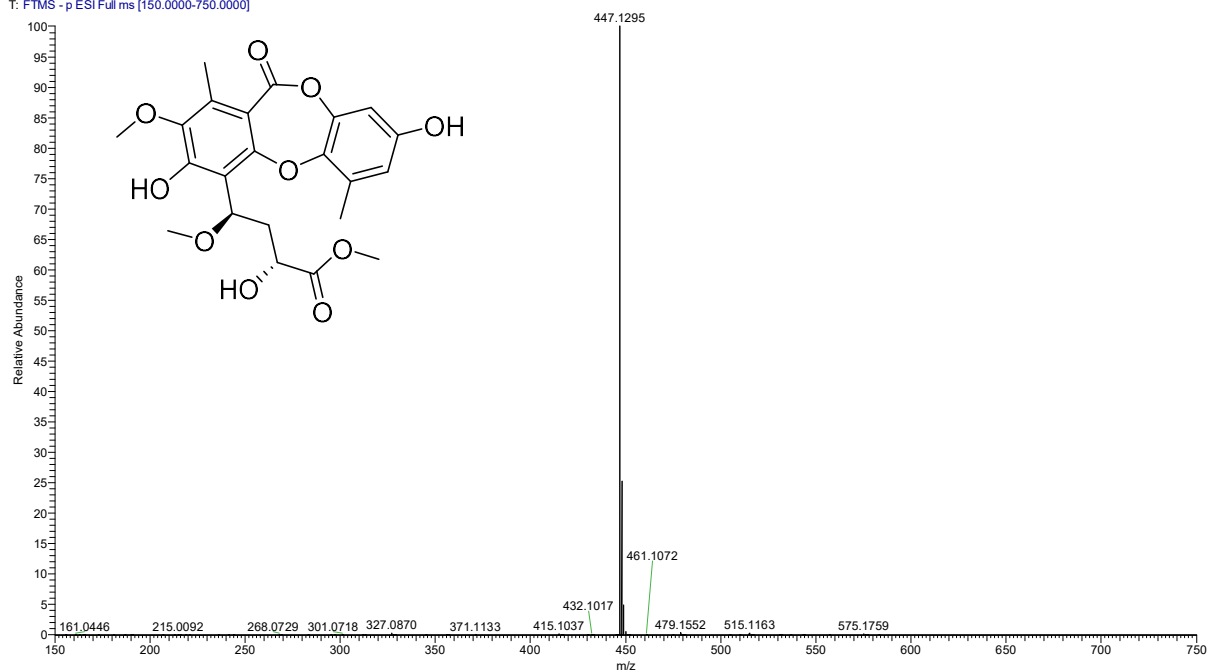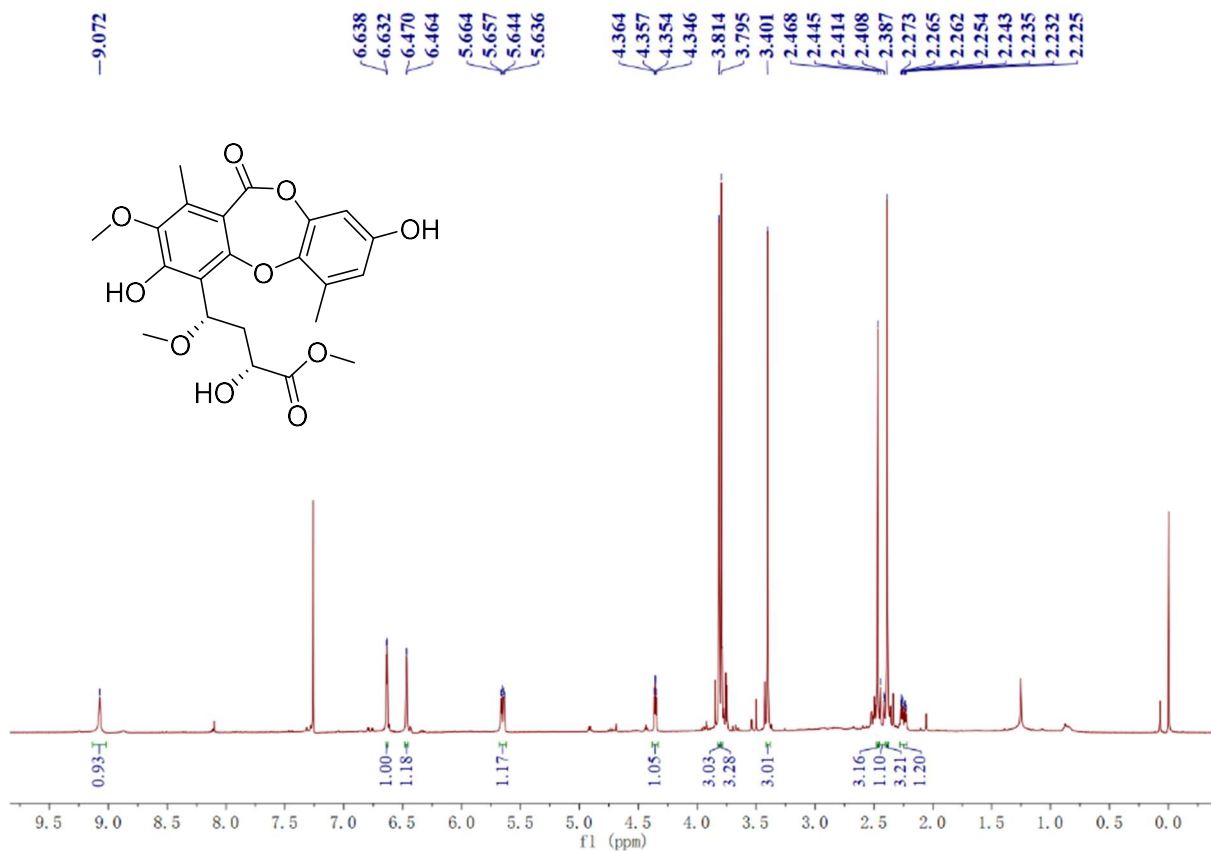



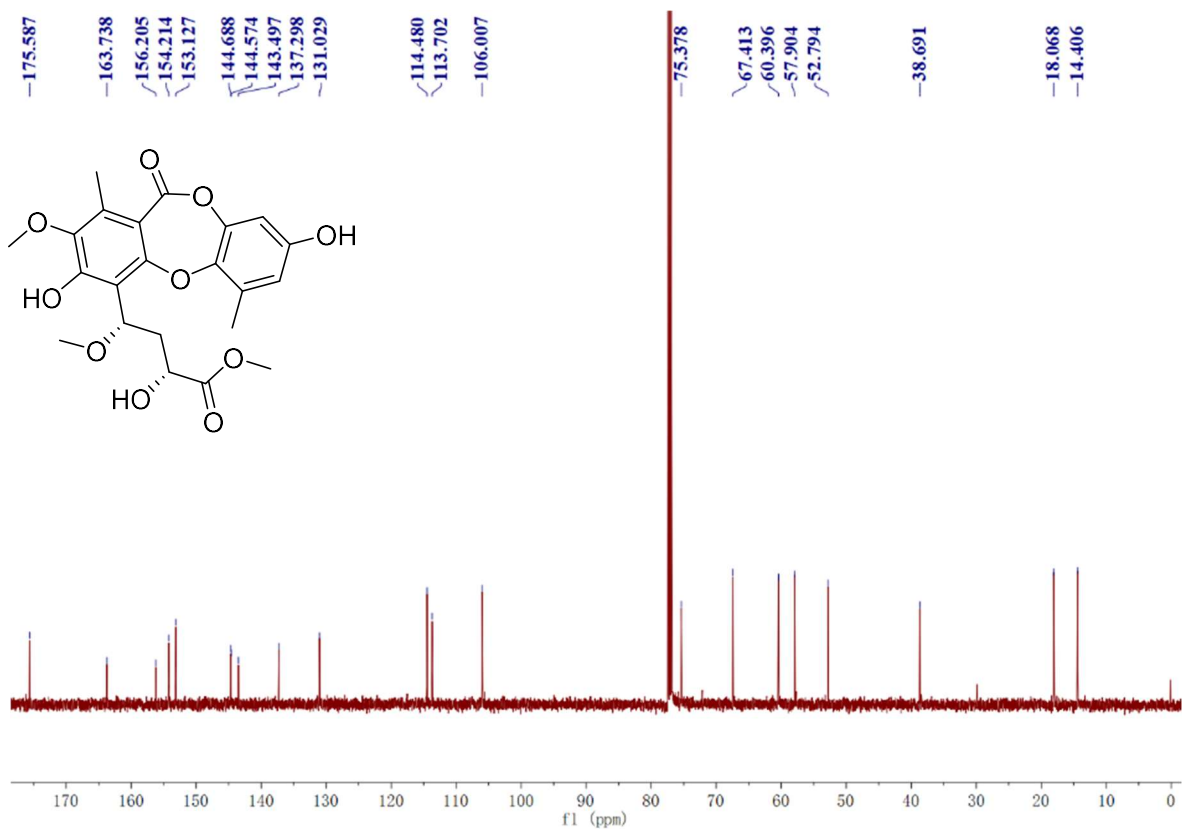

Figure S10.  $^{13}\text{C}$  NMR spectra (125 MHz,  $\text{CDCl}_3$ ) of 2.

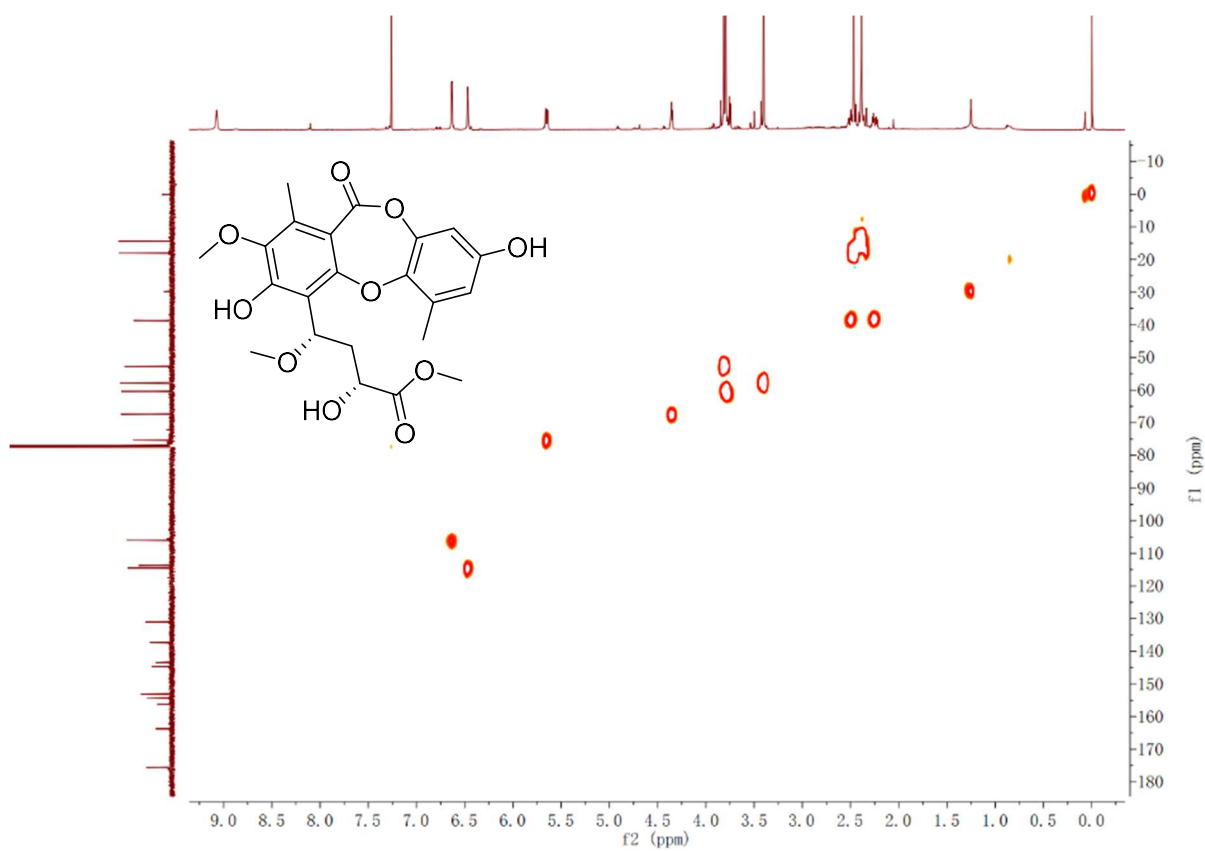

Figure S11. HMQC spectra ( $\text{CDCl}_3$ ) of 2.

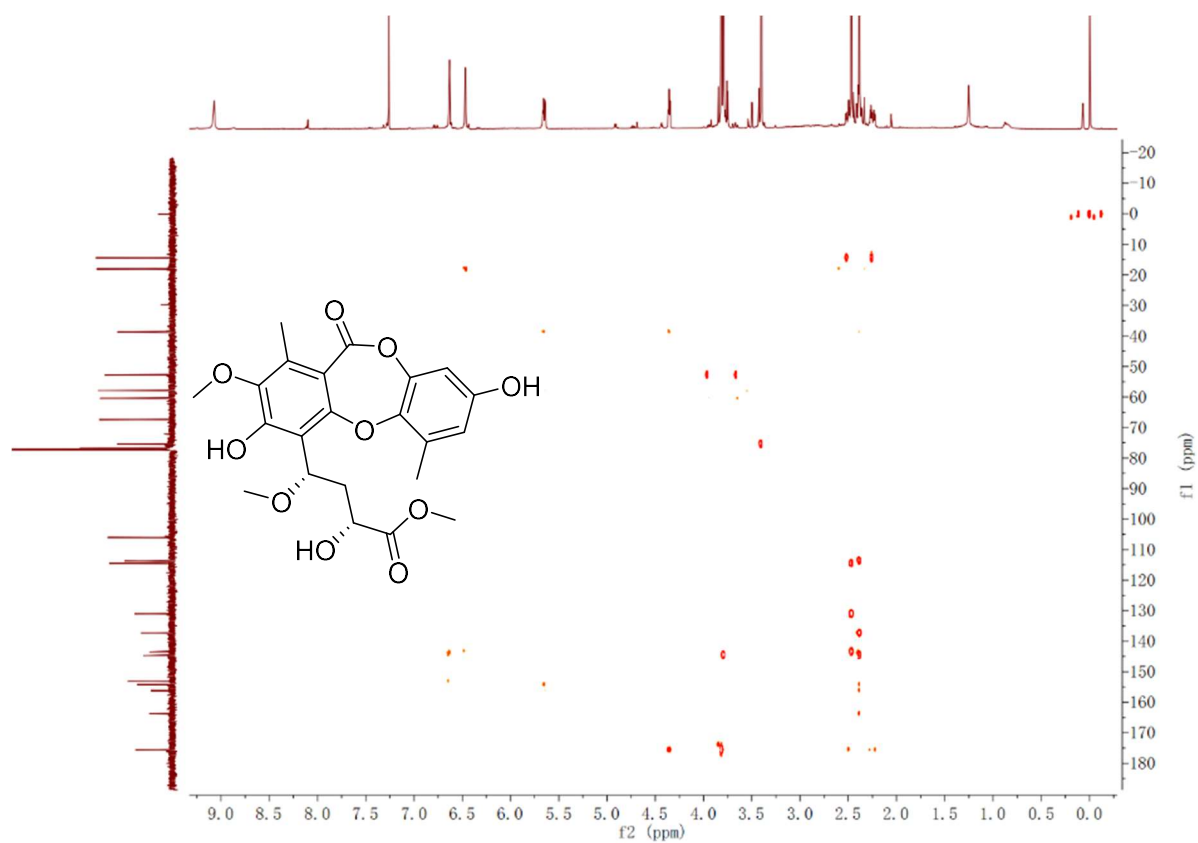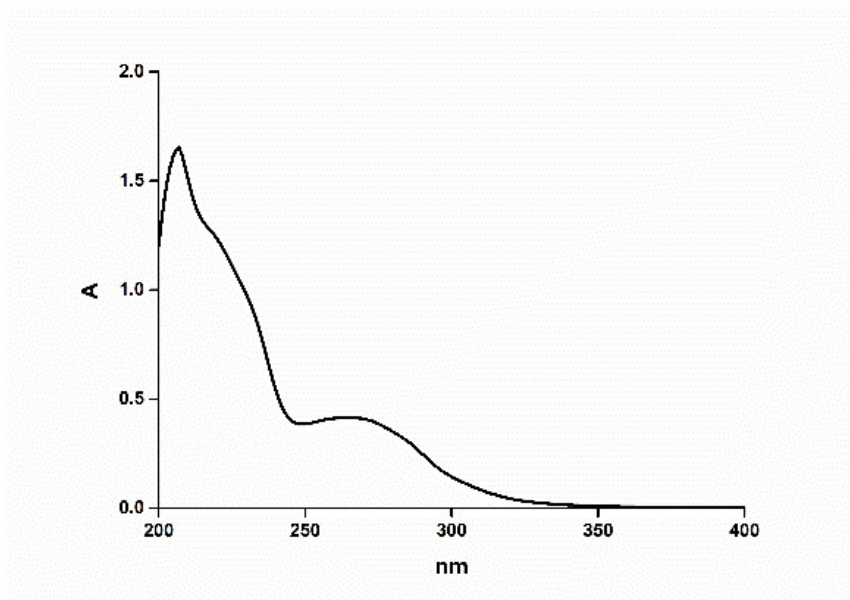

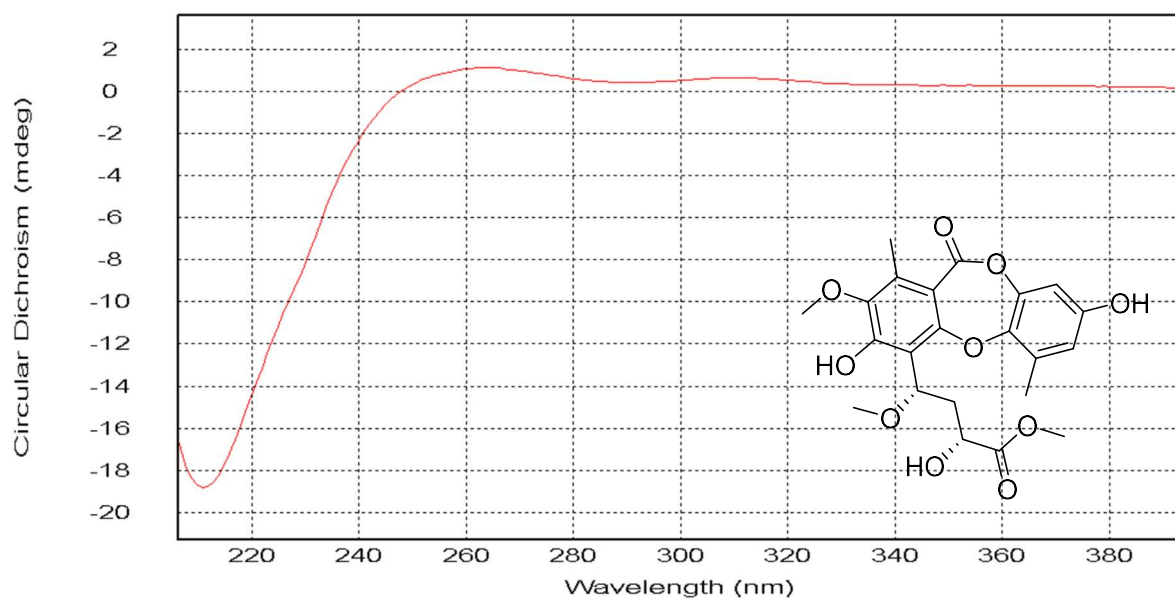

Figure S14. ECD spectra (MeOH) of 2.

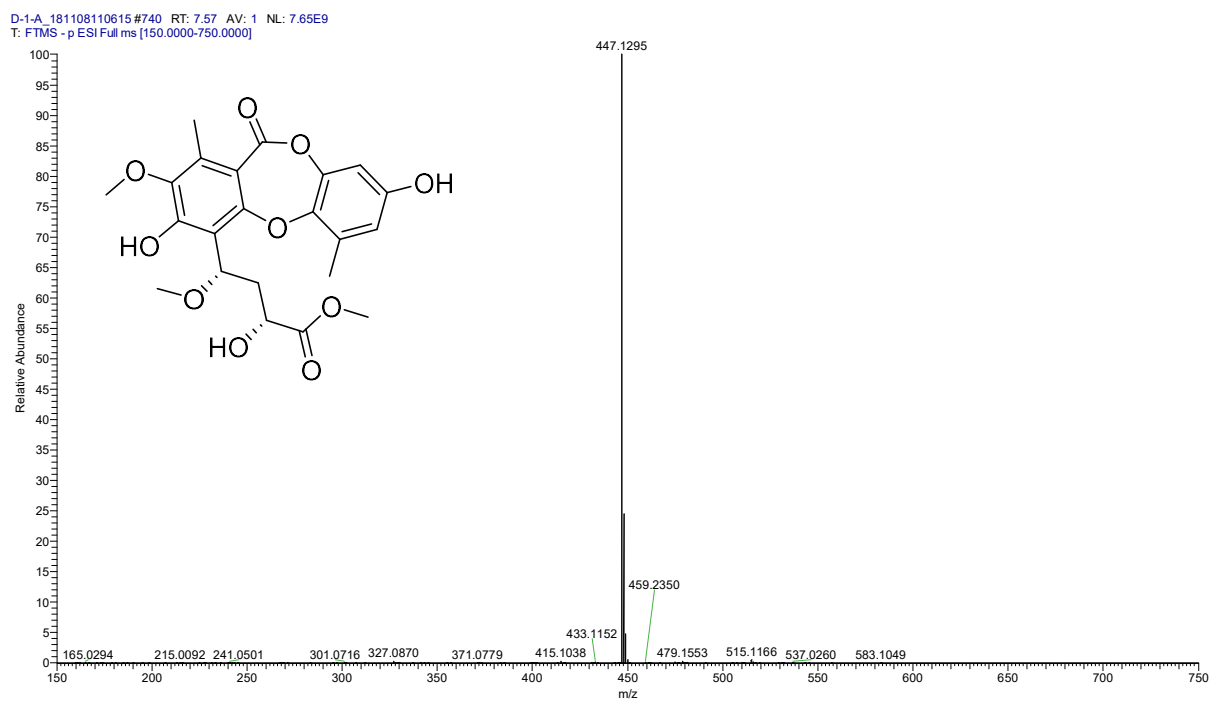

Figure S15. HRESIMS spectra of 2.

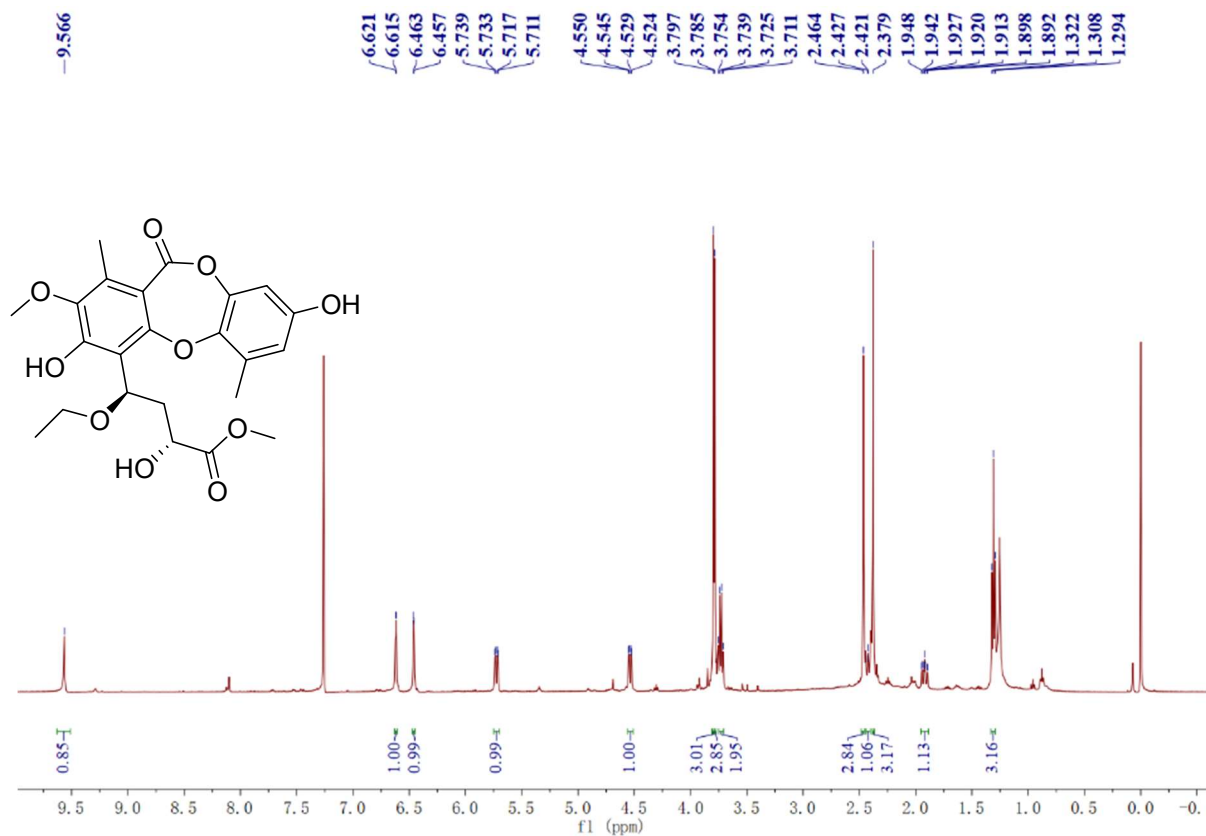

Figure S16. <sup>1</sup>H NMR spectra (500 MHz, CDCl<sub>3</sub>) of 3.

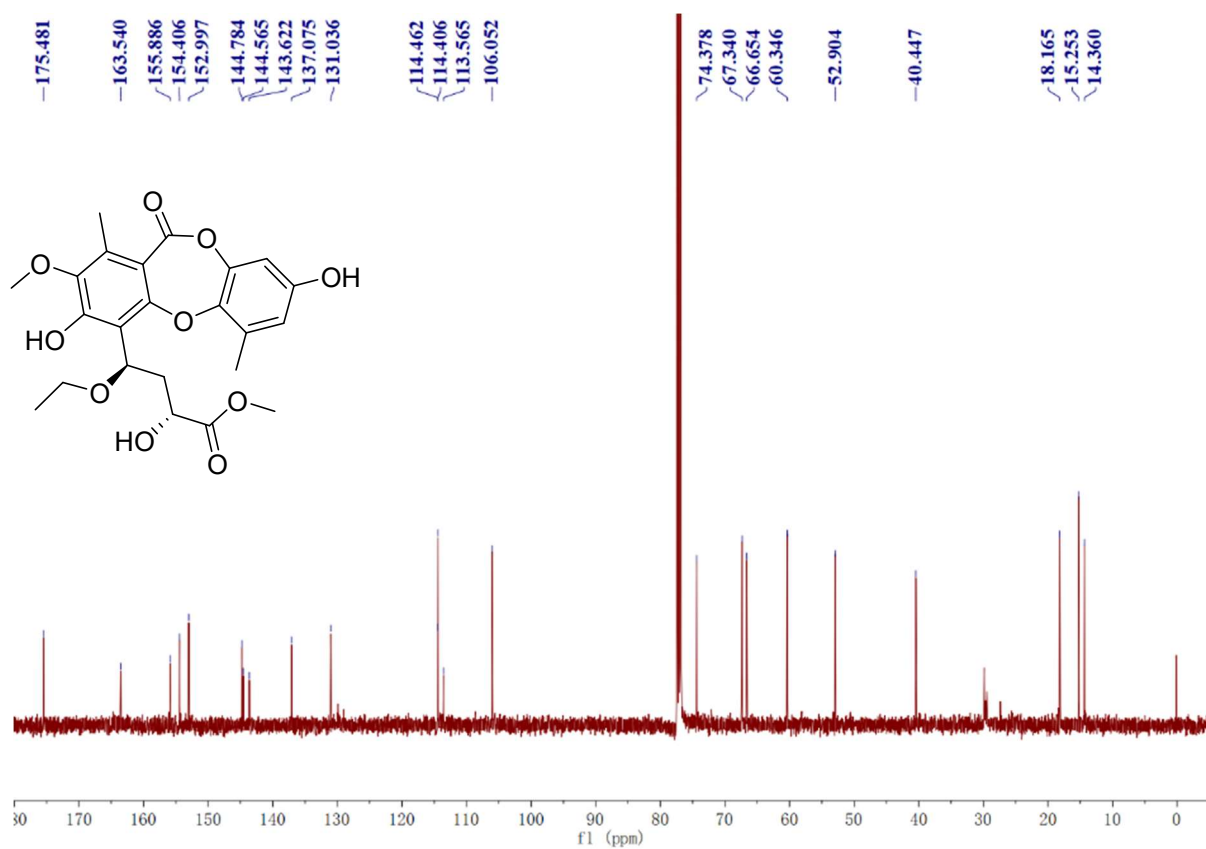

Figure S17. <sup>13</sup>C NMR spectra (125 MHz, CDCl<sub>3</sub>) of 3.

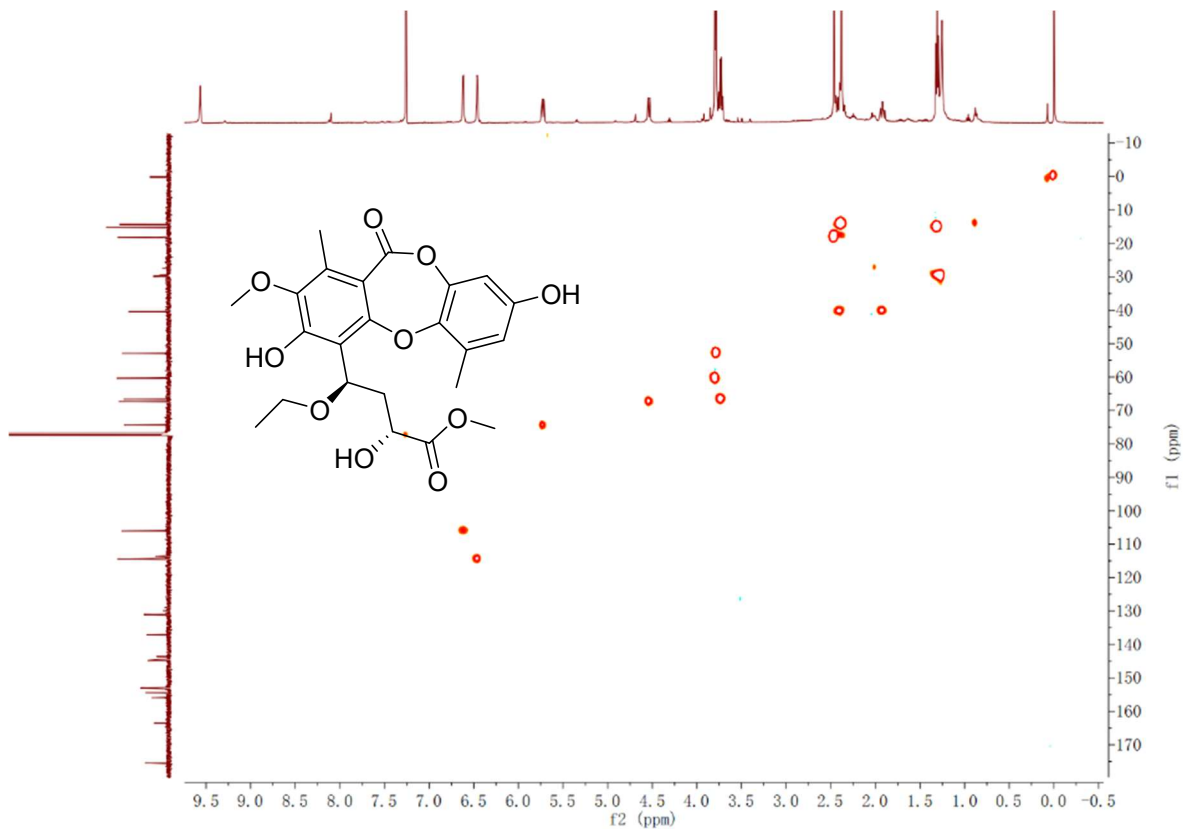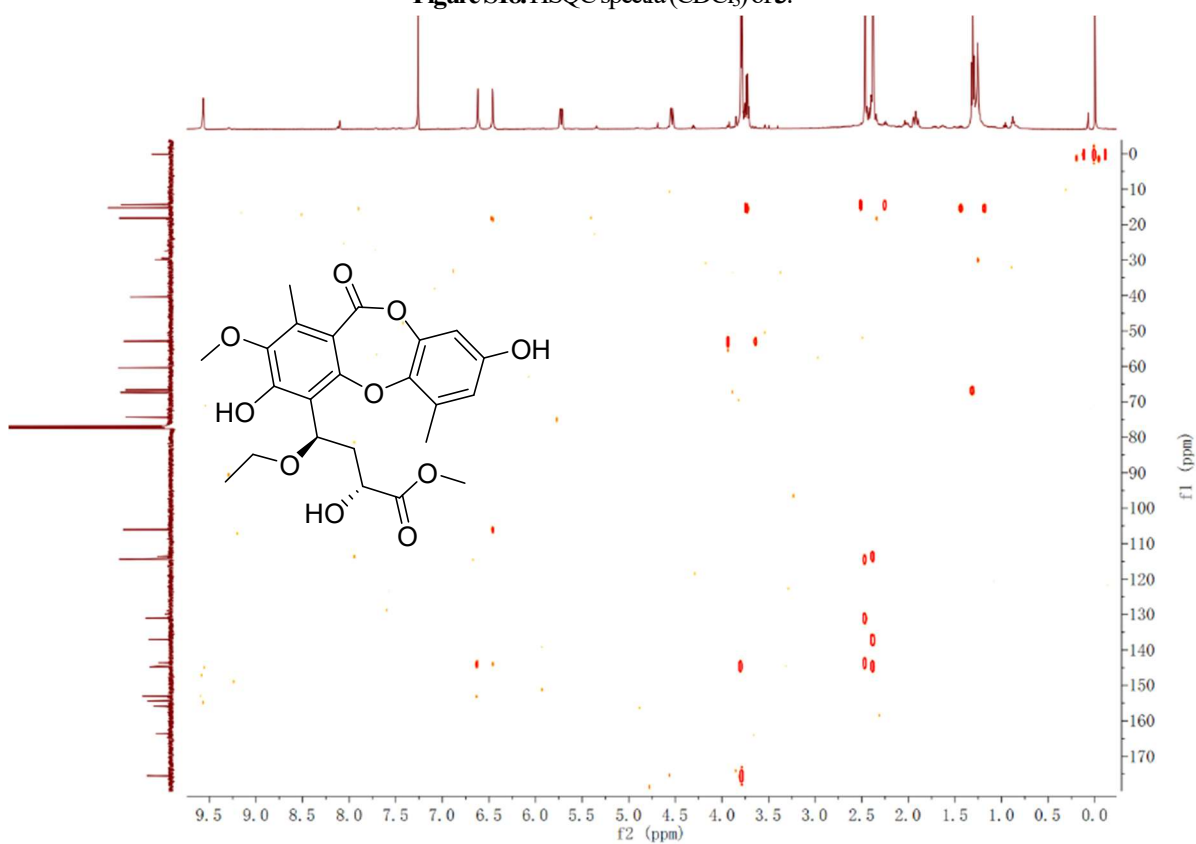

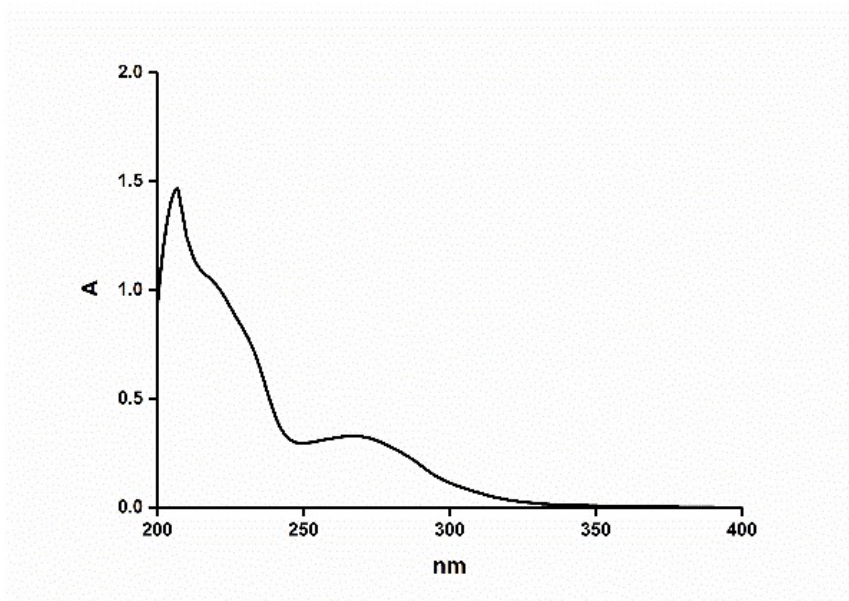

Figure S20. UV spectra (MeOH) of 3.

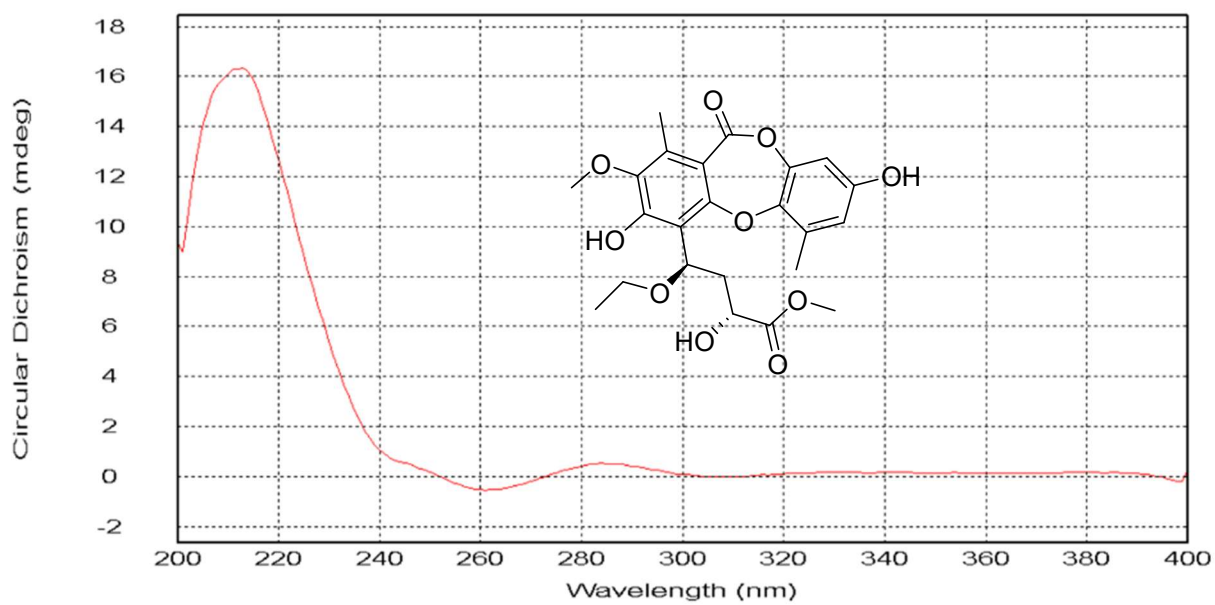

Figure S21. ECD spectra (MeOH) of 3.

D-4-B #794 RT: 8.03 AV: 1 NL: 1.14E10  
T: FTMS - p ESI Full ms [150.0000-750.0000]

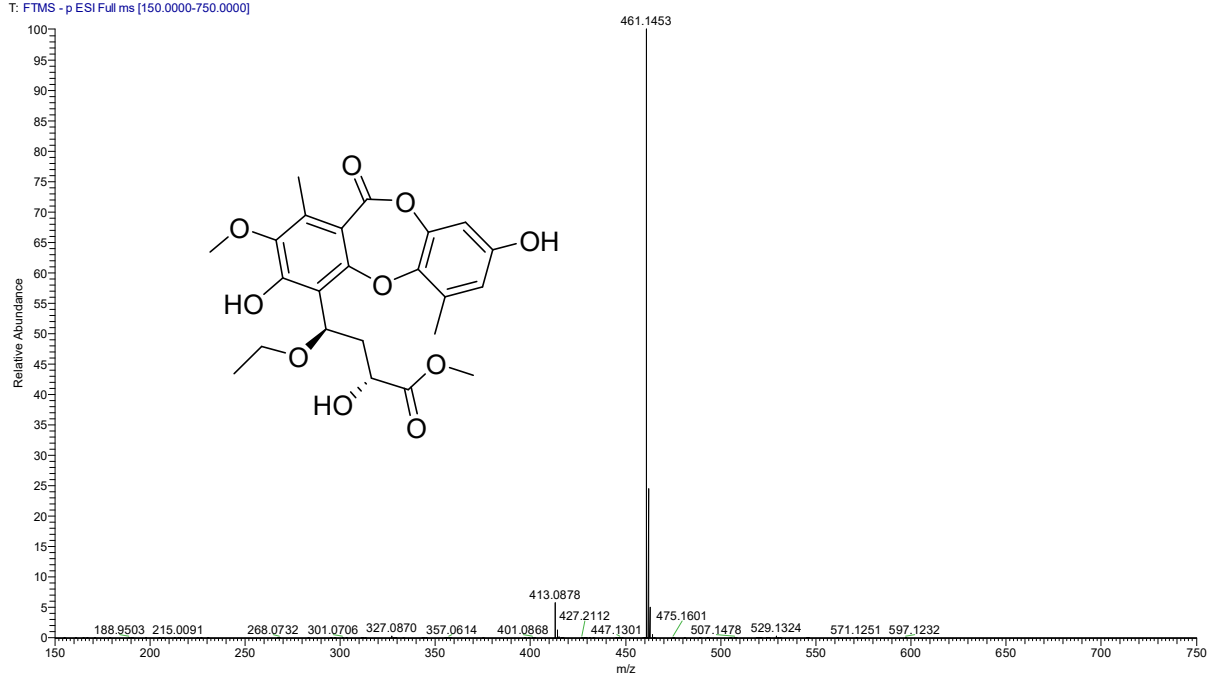

Figure S22. HRESIMS spectra of 3.

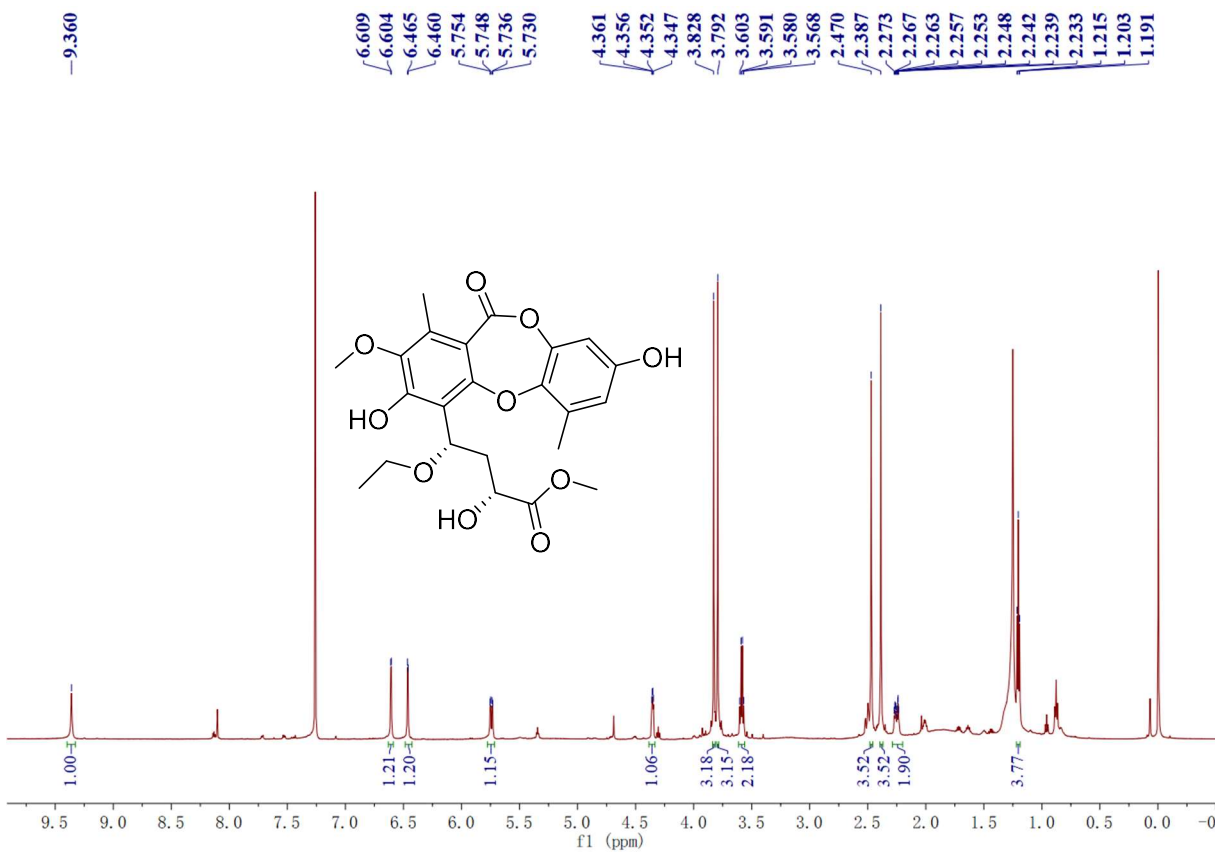

Figure S23. <sup>1</sup>H NMR spectra (500 MHz, CDCl<sub>3</sub>) of 4.

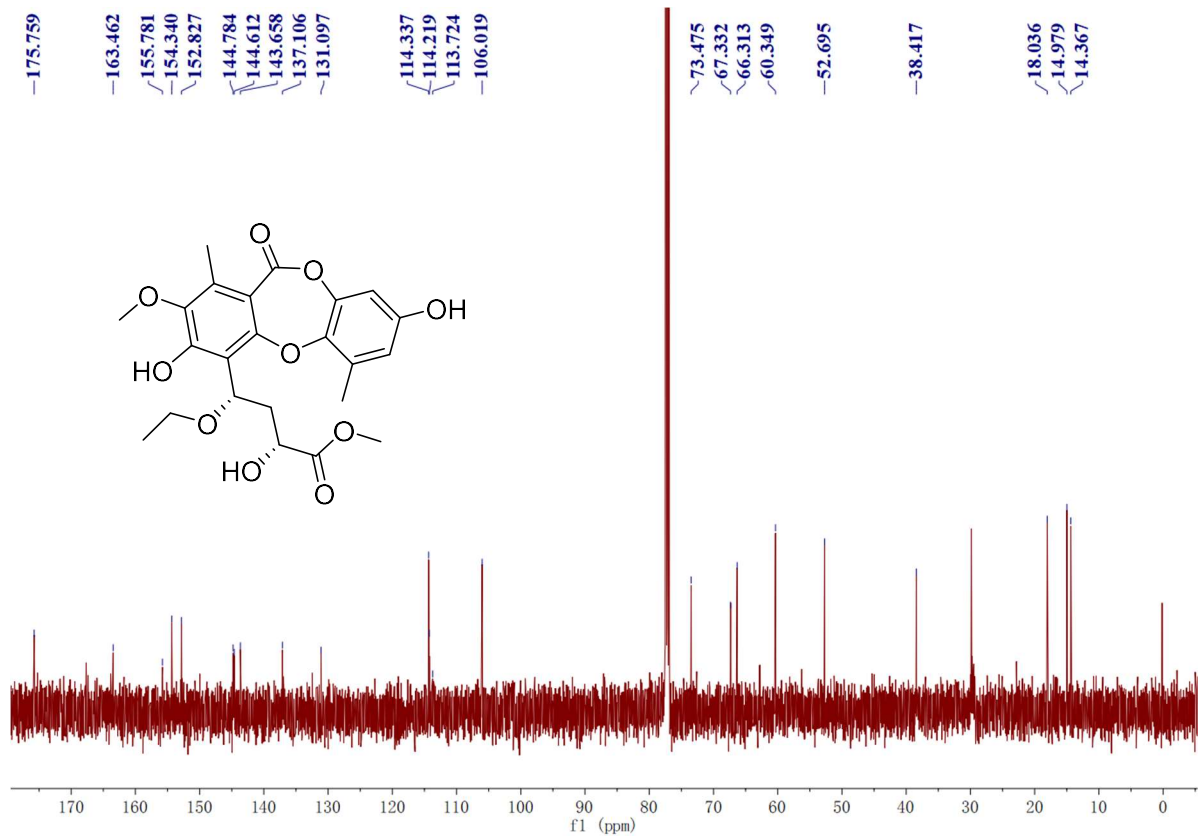

Figure S24.  $^{13}\text{C}$  NMR spectra (125 MHz,  $\text{CDCl}_3$ ) of 4.

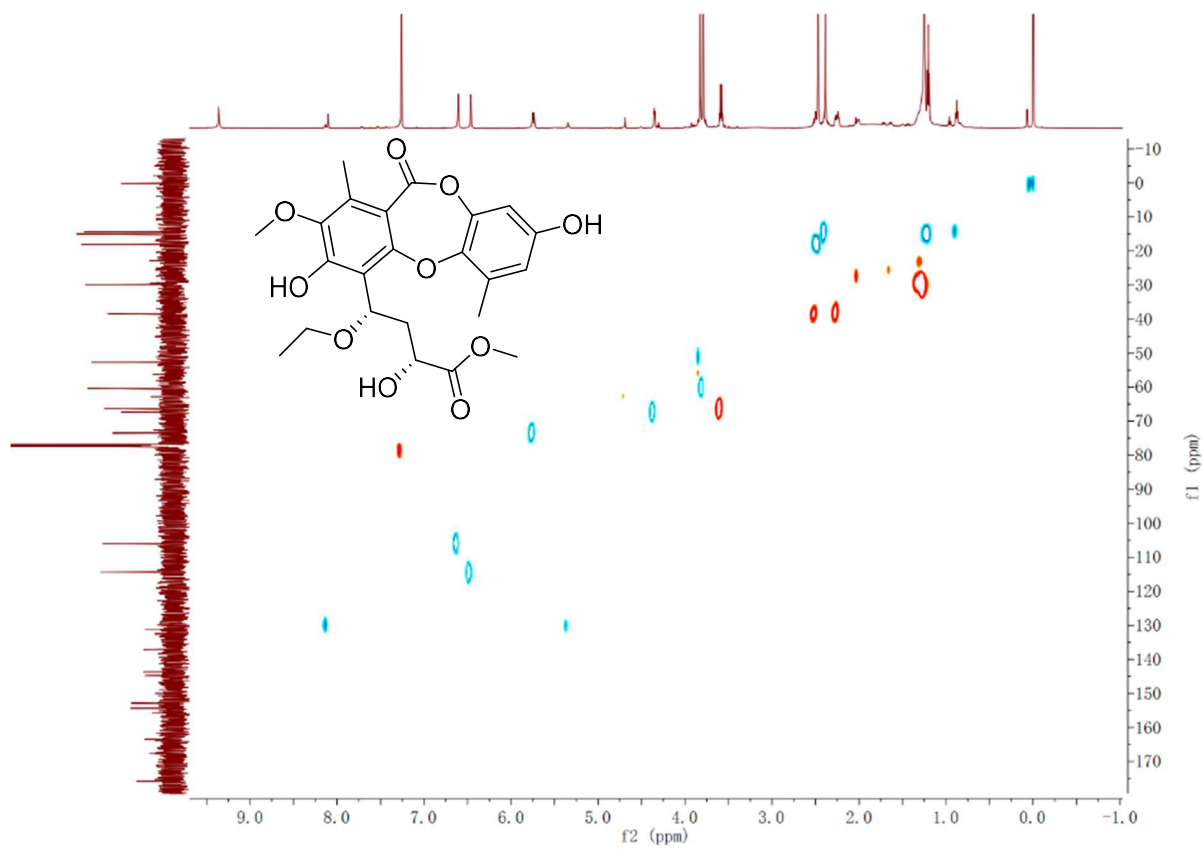

Figure S25. HSQC spectra ( $\text{CDCl}_3$ ) of 4.



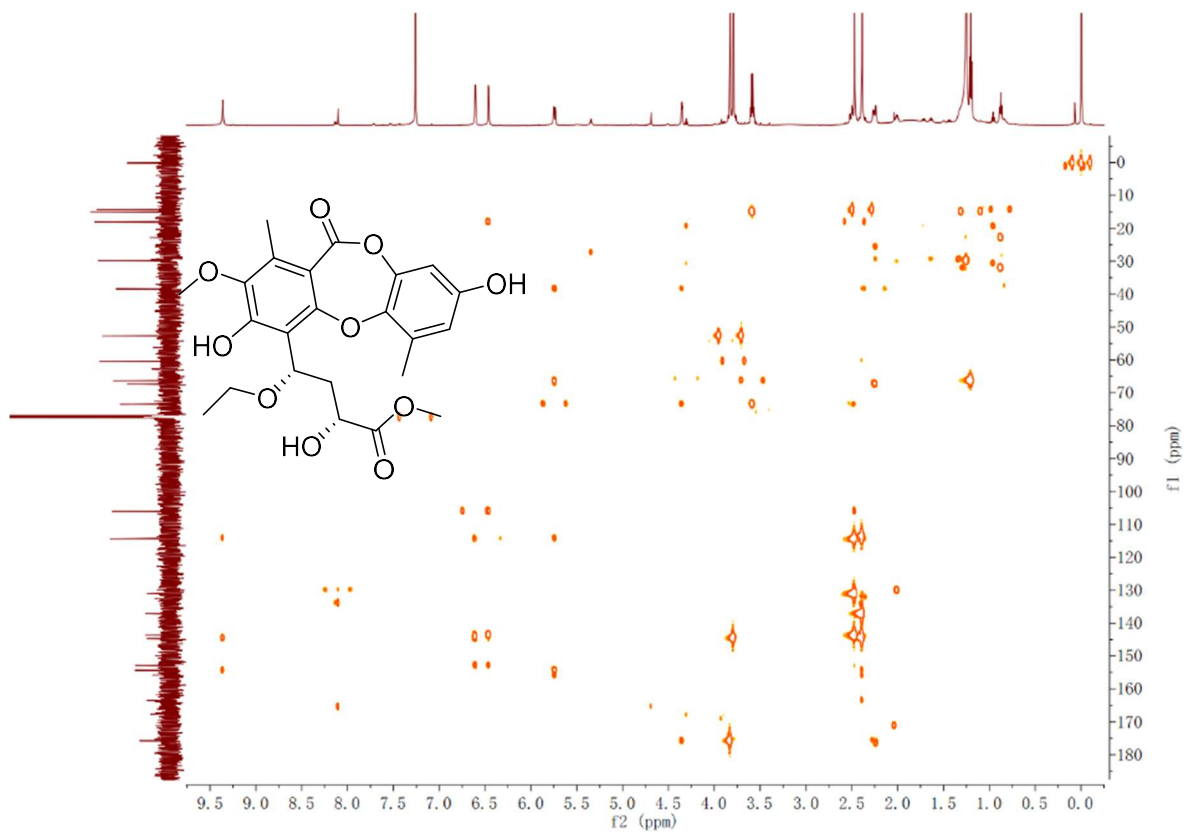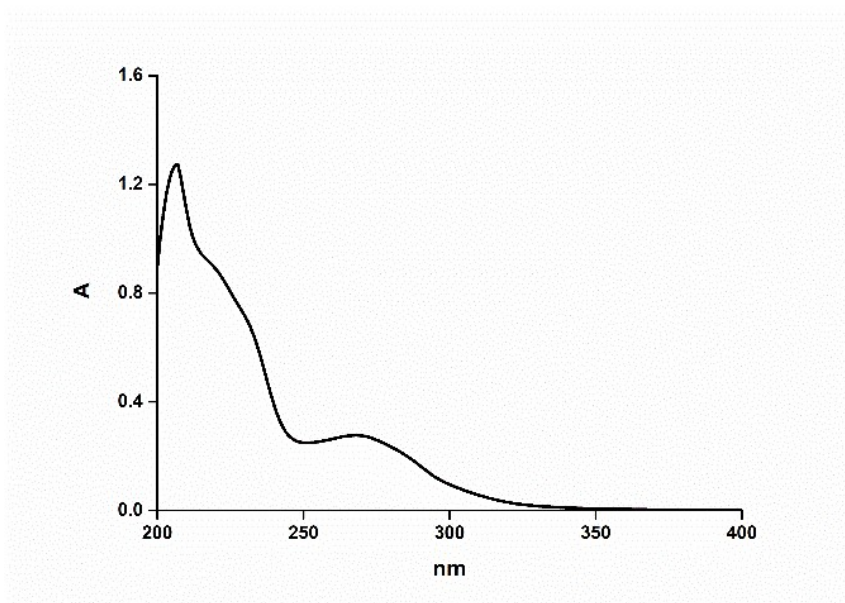

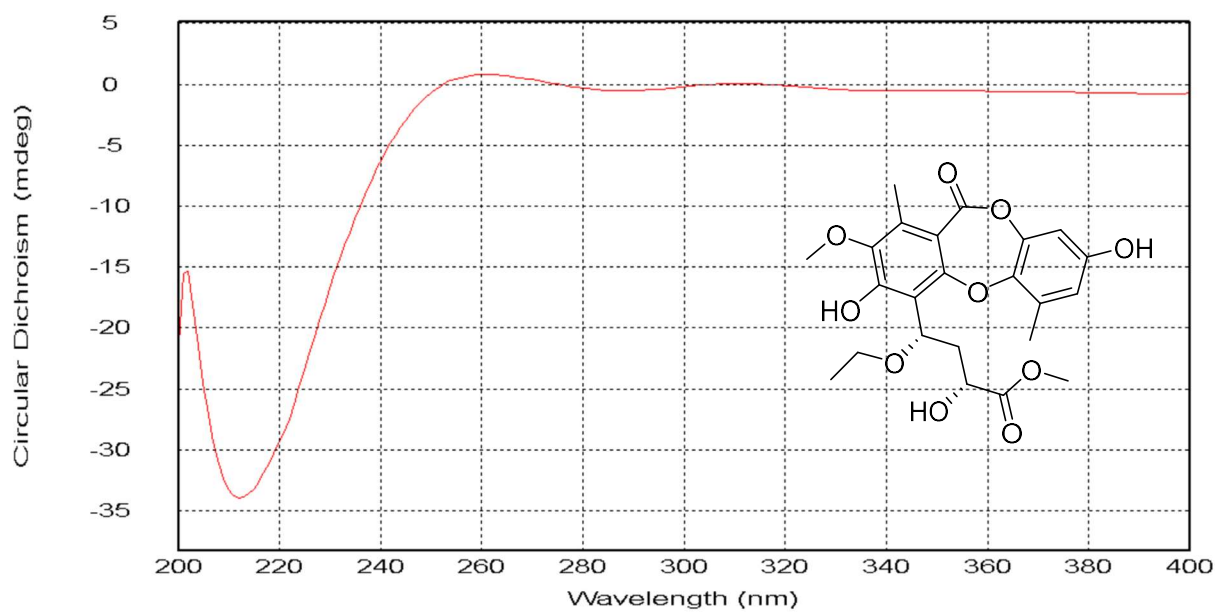

Figure S28. ECD spectra (MeOH) of 4.

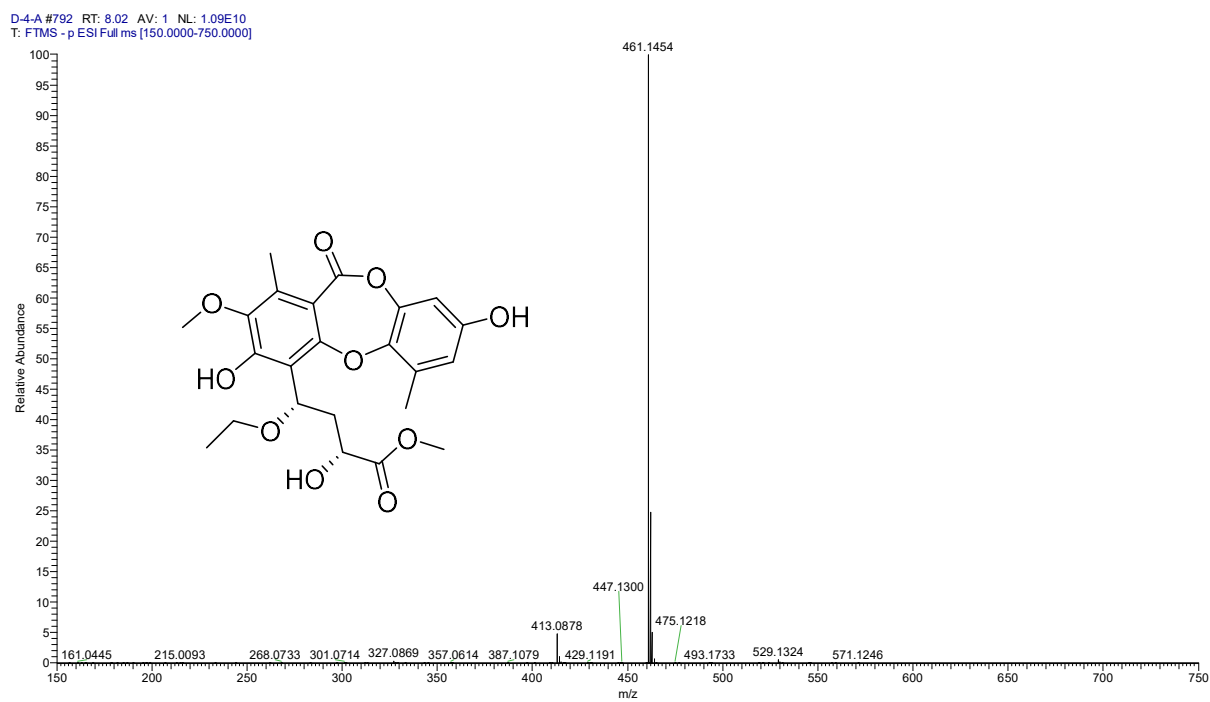

Figure S29. HRESIMS spectra of 4.

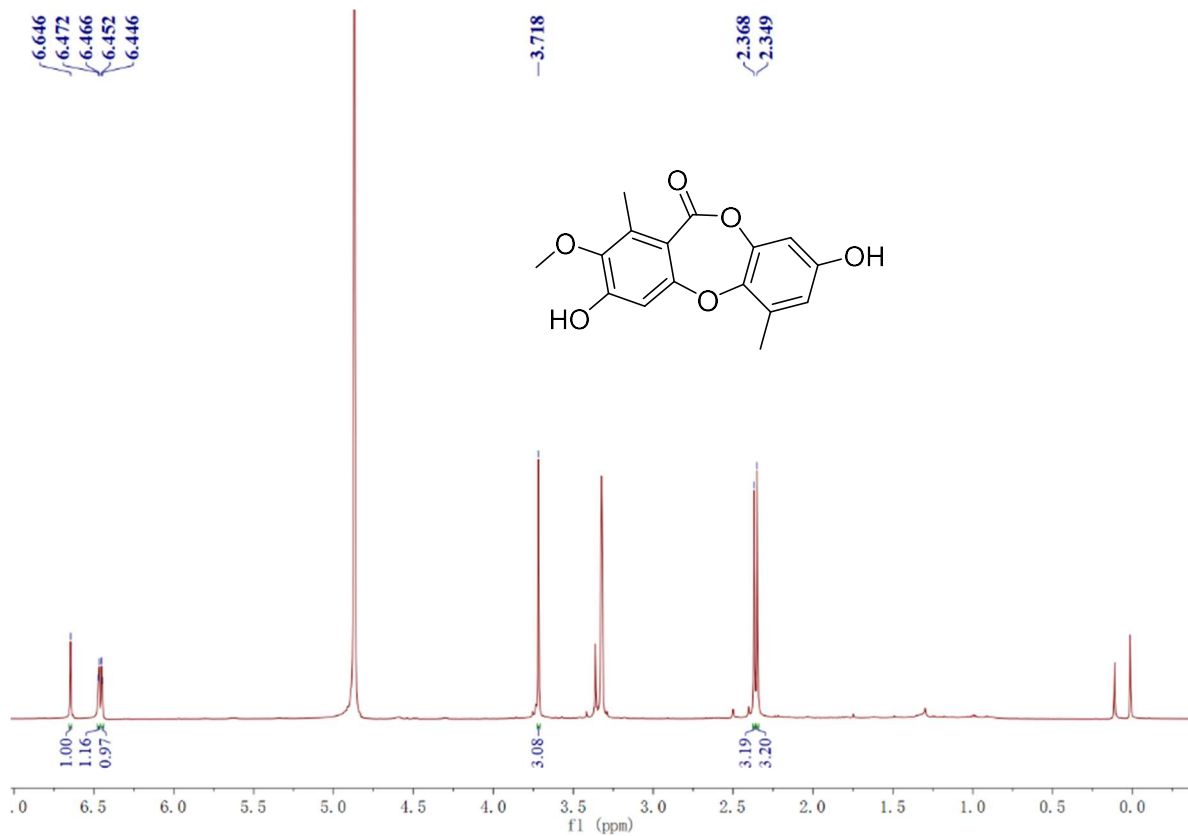

Figure S30. <sup>1</sup>H NMR spectra (500 MHz, CD<sub>3</sub>OD) of 5.

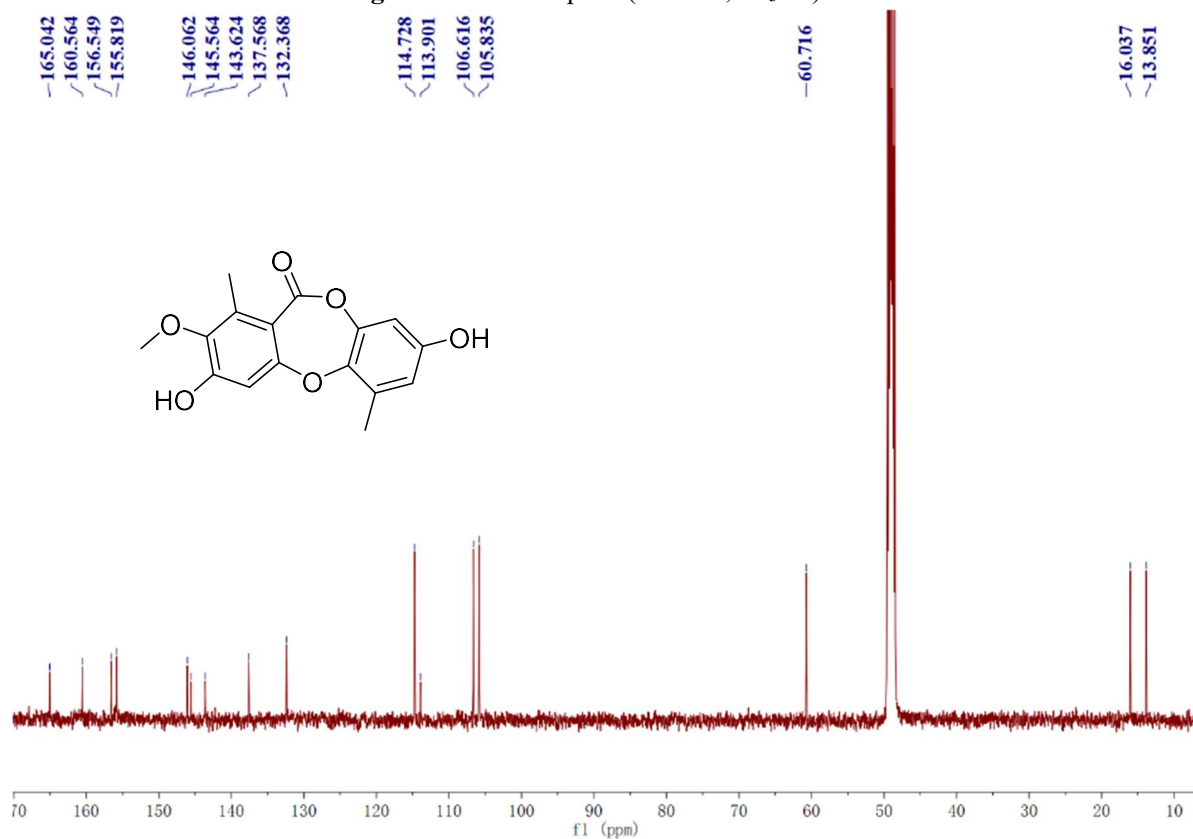

Figure S31. <sup>13</sup>C NMR spectra (125 MHz, CD<sub>3</sub>OD) of 5.

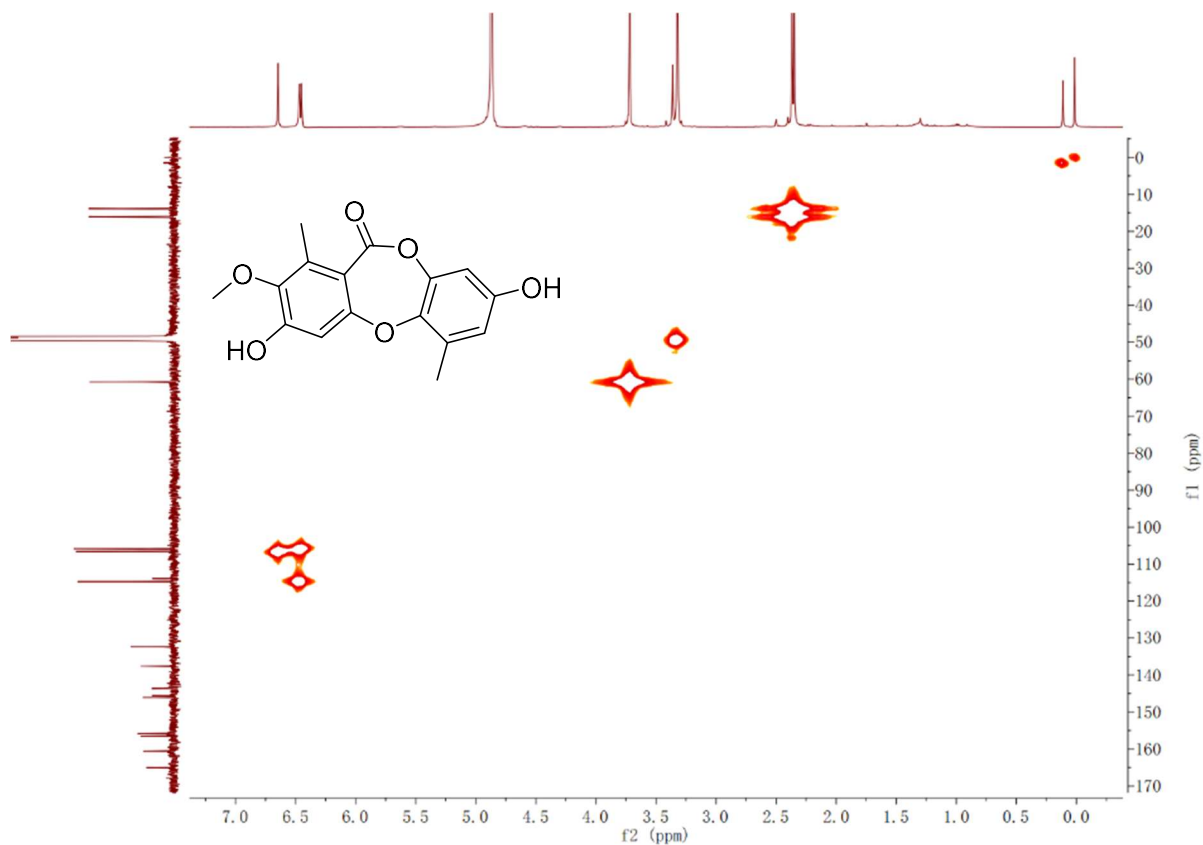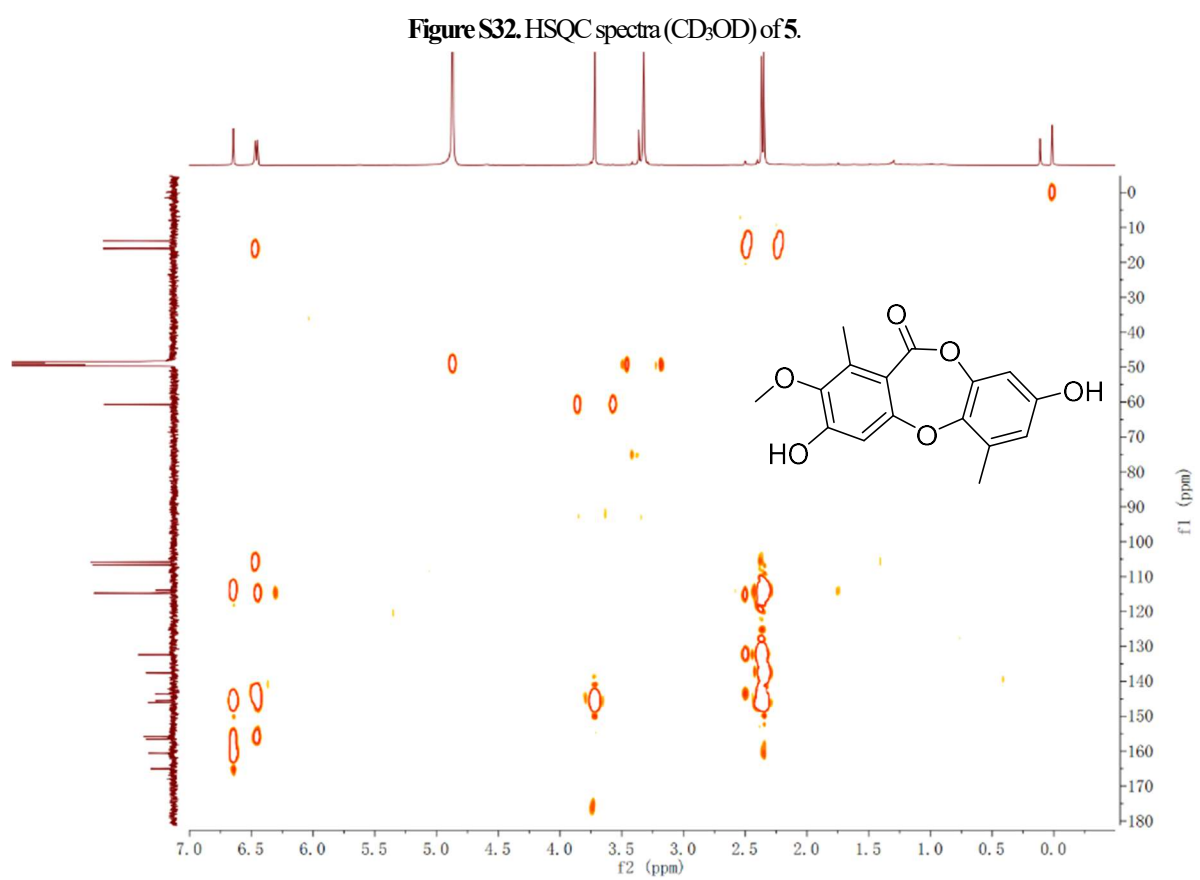

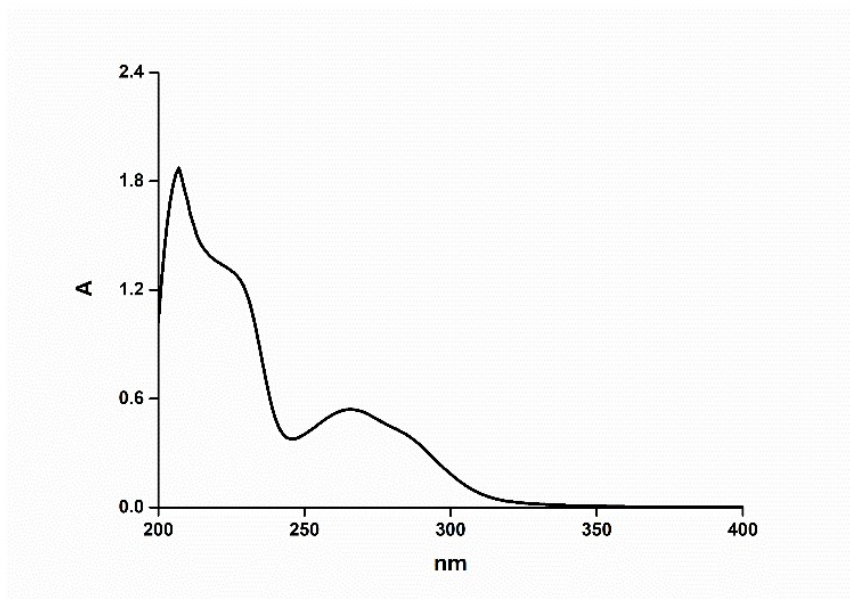

Figure S34. UV spectra (MeOH) of 5.

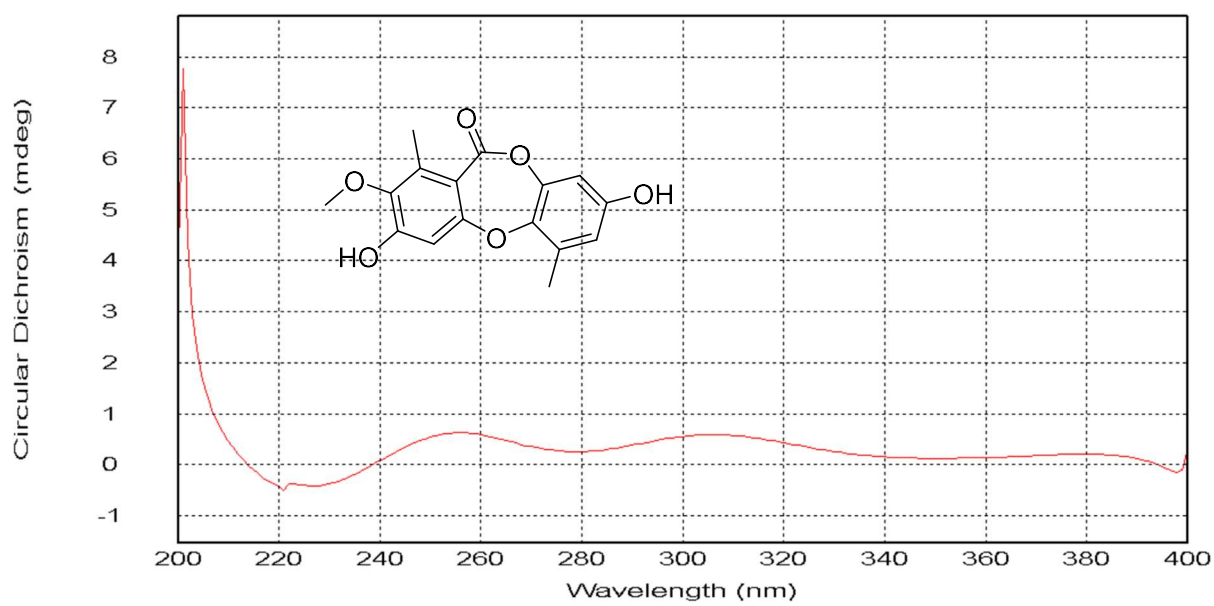

Figure S35. ECD spectra (MeOH) of 5.

D-2 #728 RT: 7.44 AV: 1 NL: 1.17E10  
T: FTMS -p ESI Full ms [150.0000-750.0000]

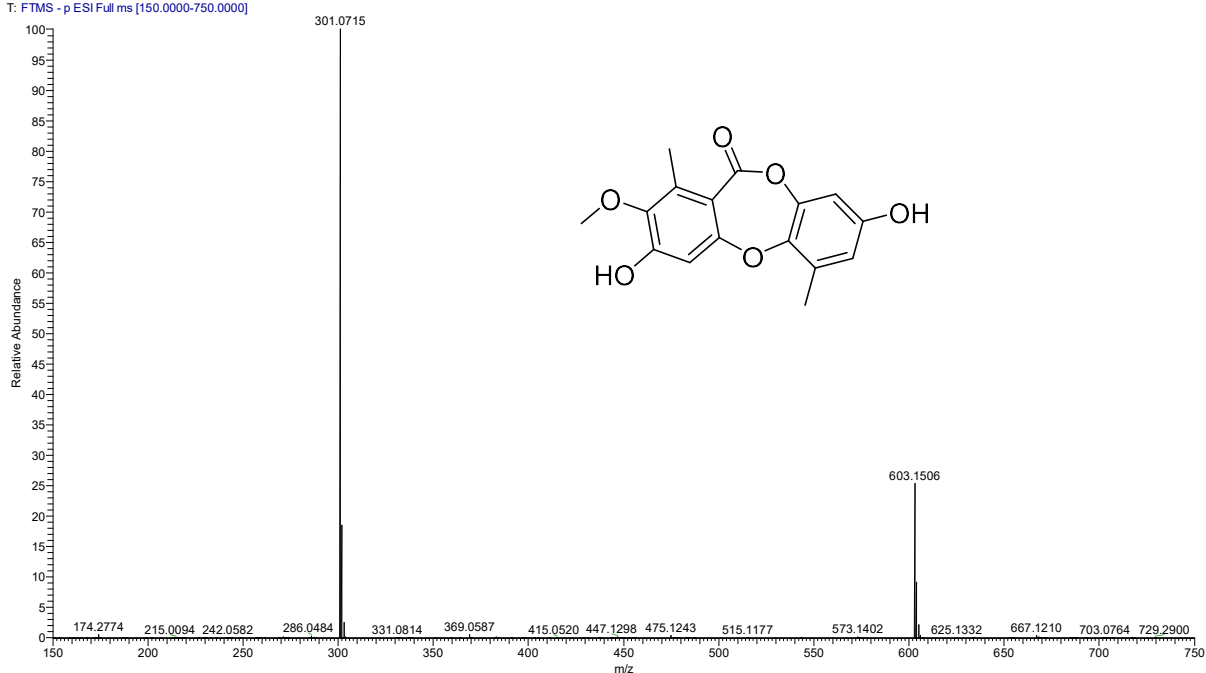

Figure S36. HRESIMS spectra of 5.

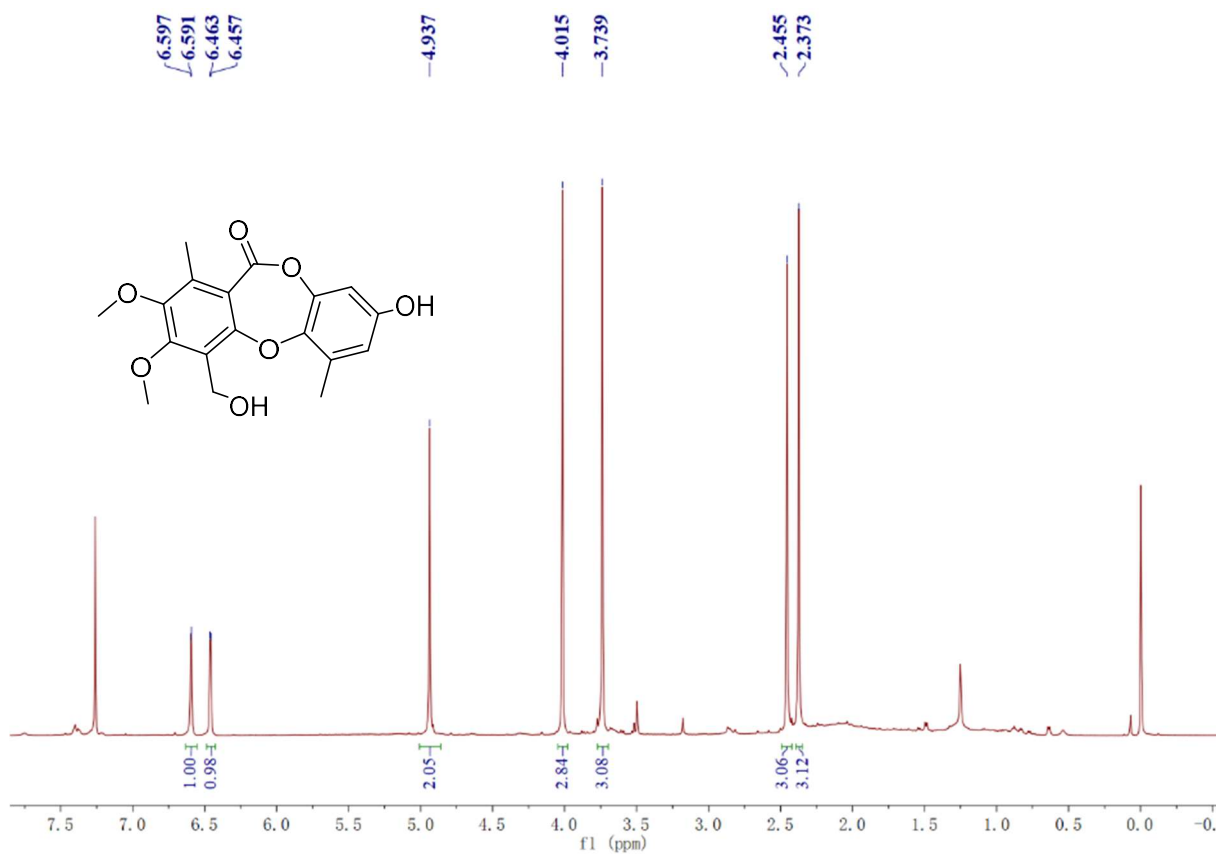

Figure S37. <sup>1</sup>H NMR spectra (500 MHz, CDCl<sub>3</sub>) of 6.

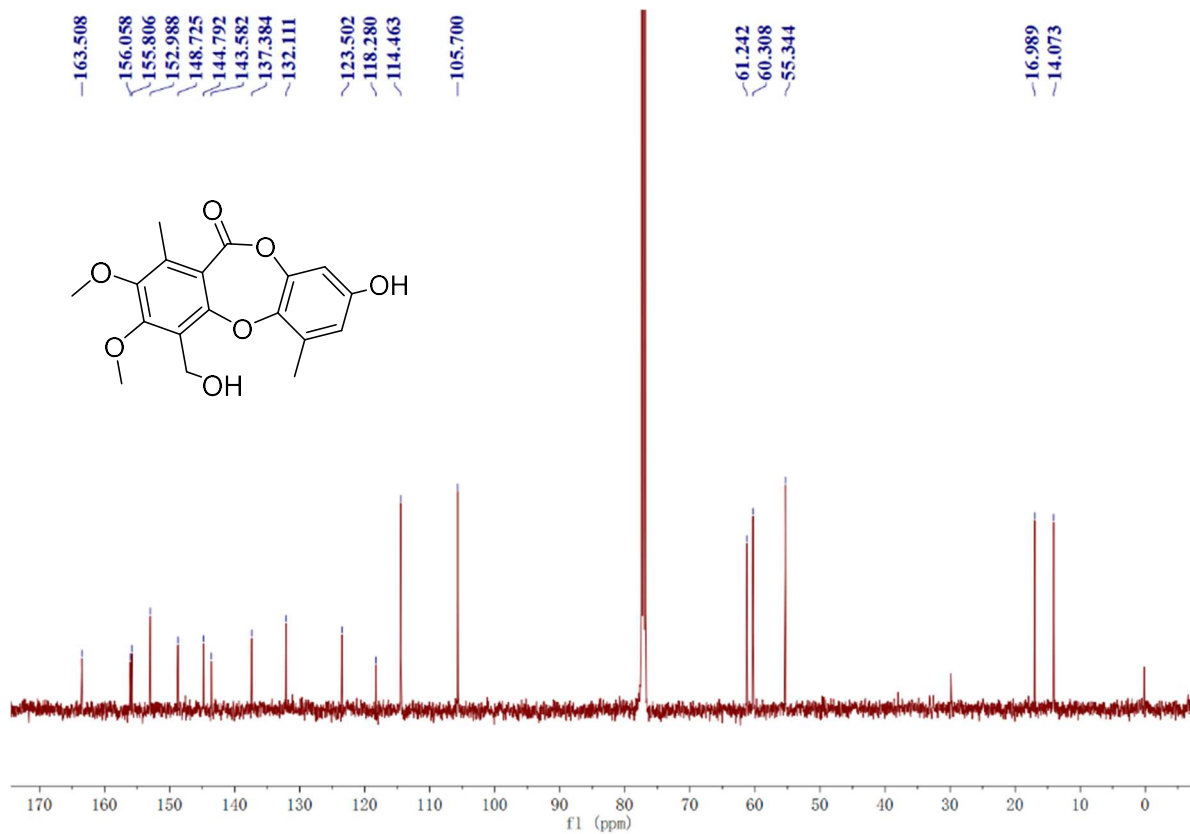

Figure S38.  $^{13}\text{C}$  NMR spectra (125 MHz,  $\text{CDCl}_3$ ) of 6.

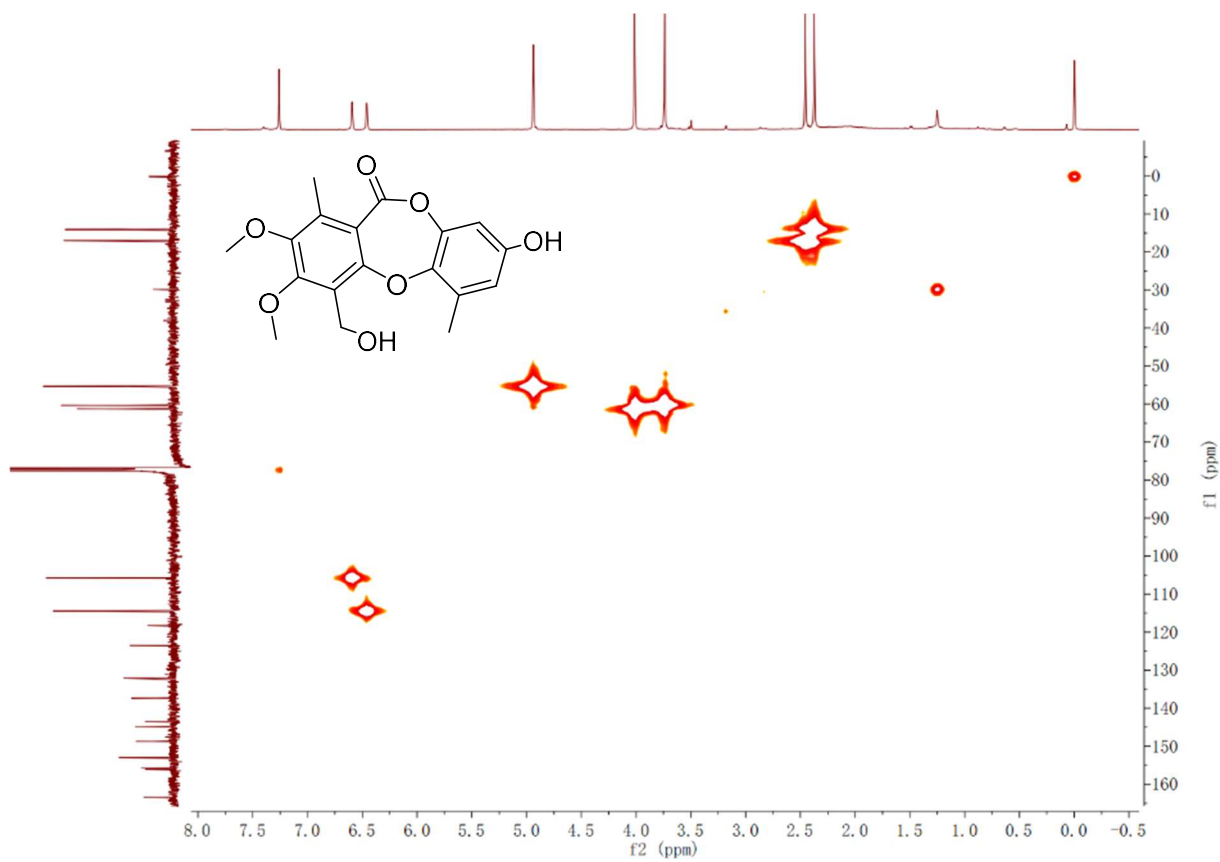

Figure S39. HSQC spectra ( $\text{CDCl}_3$ ) of 6.

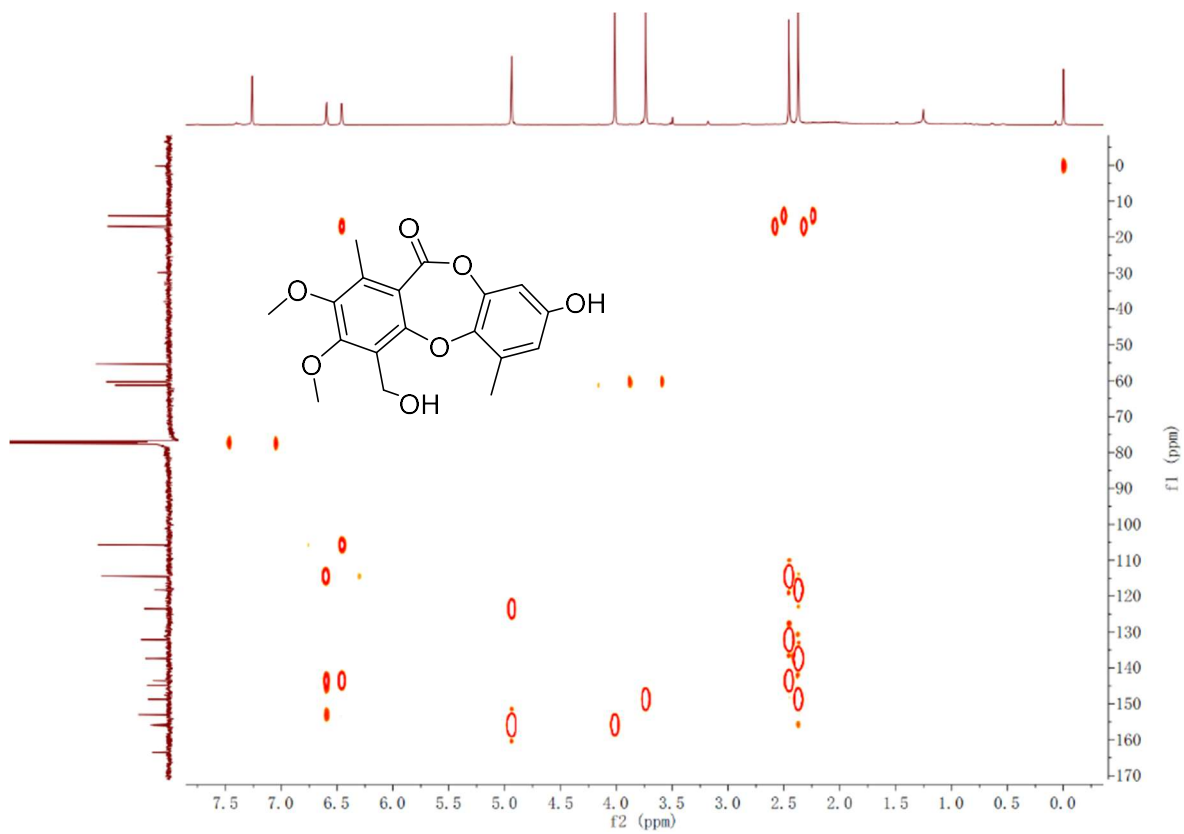

Figure S40. HMBC spectra (CDCl<sub>3</sub>) of 6.

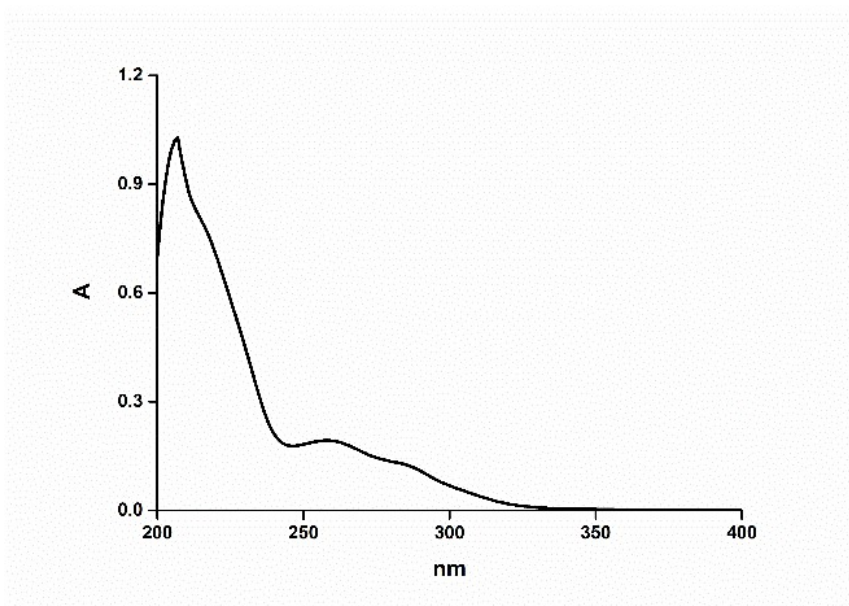

Figure S41. UV spectra (MeOH) of 6.



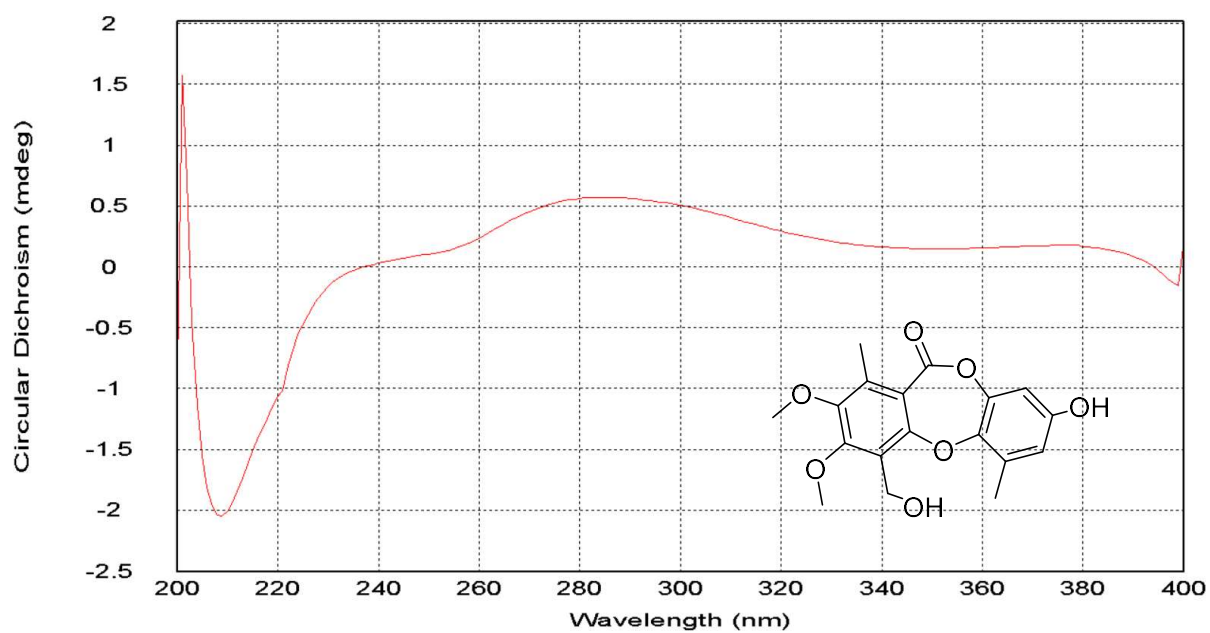

Figure S42. ECD spectra (MeOH) of 6.

D-3 #756 RT: 7.70 AV: 1 NL: 7.14E9  
T: FTMS - p ESI Full ms [150.0000-750.0000]

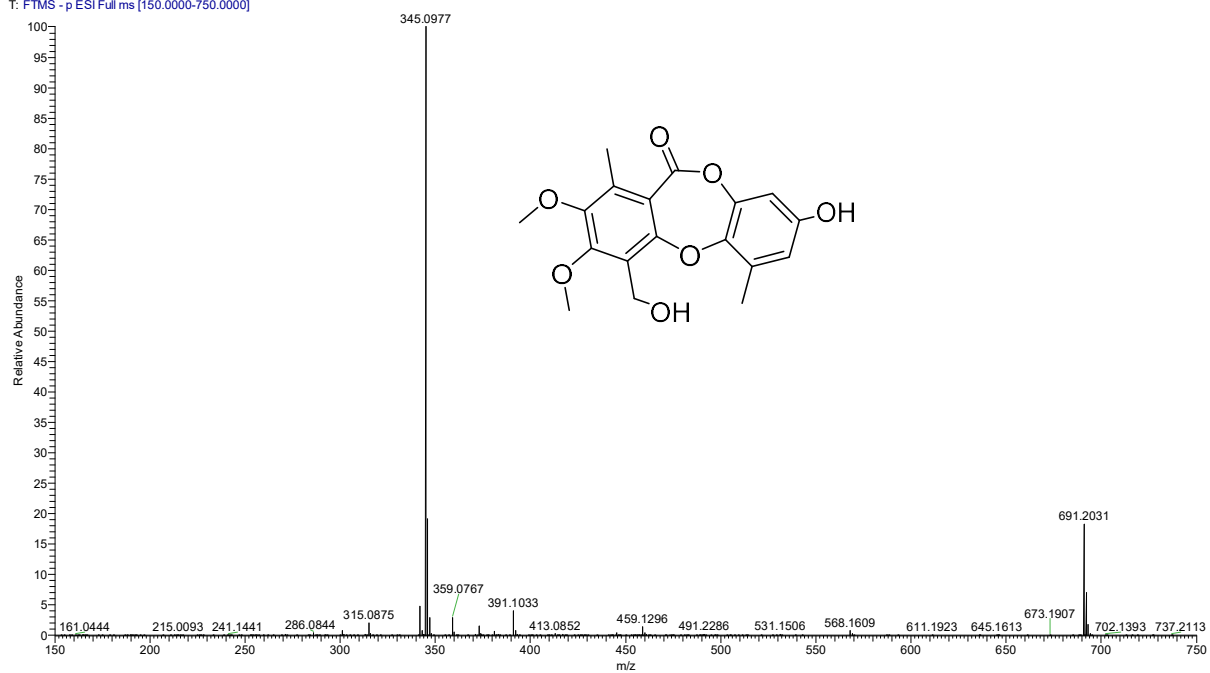

Figure S43. HRESIMS spectra of 6.

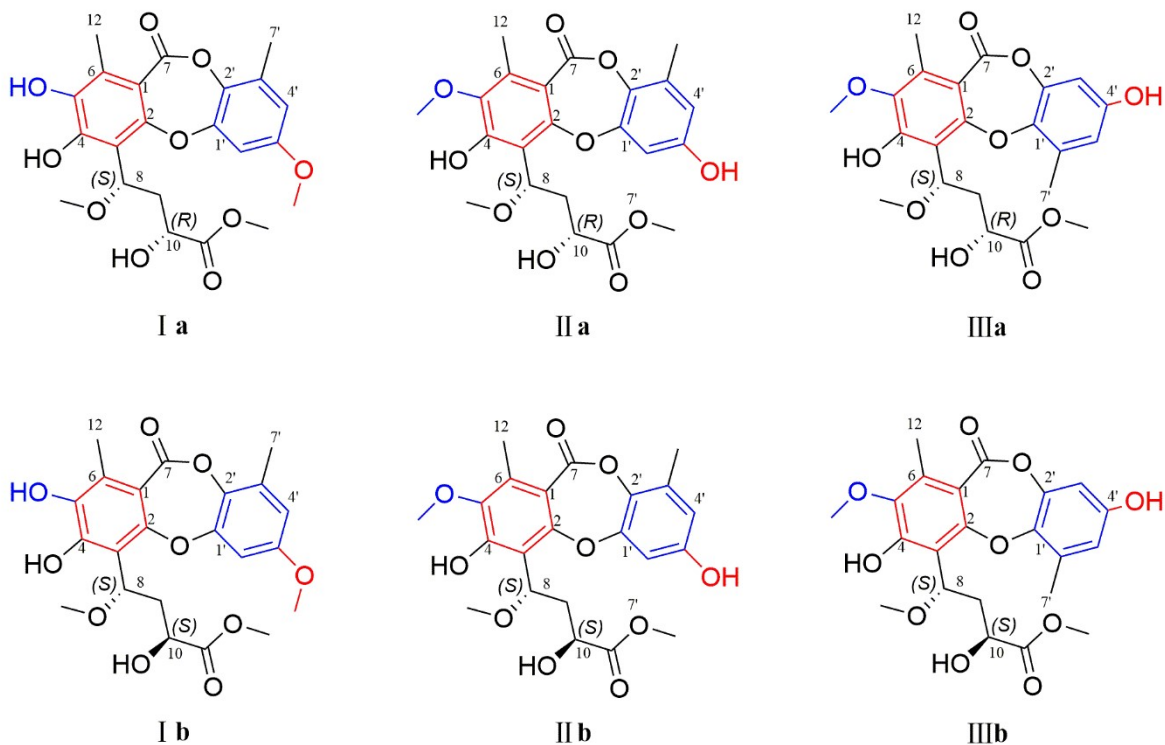

**Figure S44.** Chemical structure of undetermined relative configurations of compounds **I**, **II** and **III** (enantiomers not shown).

**Table S1.** Energies of conformers at MMFF94x force field.

| Configuration | Conformer | E (kcal/mol) | $\Delta E$ (kcal/mol) |
|---------------|-----------|--------------|-----------------------|
| <b>Ia</b>     | 1         | 100.26       | 0.00                  |
| <b>Ia</b>     | 2         | 102.31       | 2.05                  |
| <b>Ia</b>     | 3         | 102.31       | 2.05                  |
| <b>Ia</b>     | 4         | 102.31       | 2.05                  |
| <b>Ia</b>     | 5         | 102.31       | 2.05                  |
| <b>Ia</b>     | 6         | 102.31       | 2.05                  |
| <b>Ia</b>     | 7         | 102.31       | 2.05                  |
| <b>Ia</b>     | 8         | 102.31       | 2.05                  |
| <b>Ia</b>     | 9         | 102.31       | 2.05                  |
| <b>Ia</b>     | 10        | 102.31       | 2.05                  |
| <b>Ia</b>     | 11        | 102.31       | 2.05                  |
| <b>Ia</b>     | 12        | 102.31       | 2.05                  |
| <b>Ia</b>     | 13        | 102.31       | 2.05                  |
| <b>Ia</b>     | 14        | 102.72       | 2.46                  |
| <b>Ia</b>     | 15        | 102.85       | 2.58                  |
| <b>Ia</b>     | 16        | 102.88       | 2.62                  |
| <b>Ia</b>     | 17        | 102.92       | 2.66                  |

|           |    |        |      |
|-----------|----|--------|------|
| <b>Ia</b> | 18 | 103.59 | 3.33 |
| <b>Ia</b> | 19 | 103.63 | 3.36 |
| <b>Ia</b> | 20 | 104.22 | 3.96 |
| <b>Ia</b> | 21 | 104.53 | 4.27 |
| <b>Ia</b> | 22 | 104.62 | 4.36 |
| <b>Ia</b> | 23 | 104.64 | 4.38 |
| <b>Ia</b> | 24 | 104.72 | 4.45 |
| <b>Ia</b> | 25 | 104.72 | 4.45 |
| <b>Ia</b> | 26 | 104.72 | 4.45 |
| <b>Ia</b> | 27 | 104.72 | 4.45 |
| <b>Ia</b> | 28 | 104.72 | 4.45 |
| <b>Ia</b> | 29 | 104.72 | 4.45 |
| <b>Ia</b> | 30 | 104.72 | 4.45 |
| <b>Ia</b> | 31 | 104.72 | 4.45 |
| <b>Ia</b> | 32 | 104.72 | 4.45 |
| <b>Ia</b> | 33 | 104.72 | 4.45 |
| <b>Ia</b> | 34 | 104.72 | 4.45 |
| <b>Ia</b> | 35 | 104.72 | 4.45 |
| <b>Ia</b> | 36 | 104.72 | 4.45 |
| <b>Ia</b> | 37 | 104.72 | 4.45 |
| <b>Ia</b> | 38 | 104.72 | 4.45 |
| <b>Ia</b> | 39 | 104.72 | 4.45 |
| <b>Ia</b> | 40 | 104.91 | 4.64 |
| <b>Ia</b> | 41 | 105.05 | 4.79 |
| <b>Ia</b> | 42 | 105.20 | 4.94 |
| <b>Ib</b> | 1  | 101.09 | 0.00 |
| <b>Ib</b> | 2  | 101.22 | 0.13 |
| <b>Ib</b> | 3  | 102.39 | 1.30 |
| <b>Ib</b> | 4  | 102.60 | 1.51 |
| <b>Ib</b> | 5  | 102.98 | 1.88 |
| <b>Ib</b> | 6  | 103.01 | 1.92 |
| <b>Ib</b> | 7  | 103.62 | 2.52 |
| <b>Ib</b> | 8  | 103.62 | 2.52 |
| <b>Ib</b> | 9  | 103.62 | 2.52 |
| <b>Ib</b> | 10 | 103.62 | 2.52 |
| <b>Ib</b> | 11 | 103.62 | 2.52 |
| <b>Ib</b> | 12 | 103.62 | 2.52 |
| <b>Ib</b> | 13 | 103.62 | 2.52 |
| <b>Ib</b> | 14 | 103.62 | 2.52 |
| <b>Ib</b> | 15 | 103.62 | 2.52 |
| <b>Ib</b> | 16 | 103.62 | 2.52 |
| <b>Ib</b> | 17 | 103.62 | 2.52 |
| <b>Ib</b> | 18 | 103.62 | 2.52 |

|            |    |        |      |
|------------|----|--------|------|
| <b>Ib</b>  | 19 | 103.62 | 2.52 |
| <b>Ib</b>  | 20 | 103.62 | 2.52 |
| <b>Ib</b>  | 21 | 103.62 | 2.52 |
| <b>Ib</b>  | 22 | 103.62 | 2.52 |
| <b>Ib</b>  | 23 | 103.62 | 2.52 |
| <b>Ib</b>  | 24 | 103.91 | 2.81 |
| <b>Ib</b>  | 25 | 104.10 | 3.01 |
| <b>Ib</b>  | 26 | 104.46 | 3.37 |
| <b>Ib</b>  | 27 | 104.46 | 3.37 |
| <b>Ib</b>  | 28 | 104.46 | 3.37 |
| <b>Ib</b>  | 29 | 104.46 | 3.37 |
| <b>Ib</b>  | 30 | 104.46 | 3.37 |
| <b>Ib</b>  | 31 | 104.46 | 3.37 |
| <b>Ib</b>  | 32 | 104.46 | 3.37 |
| <b>Ib</b>  | 33 | 104.46 | 3.37 |
| <b>Ib</b>  | 34 | 104.46 | 3.37 |
| <b>Ib</b>  | 35 | 104.46 | 3.37 |
| <b>Ib</b>  | 36 | 104.46 | 3.37 |
| <b>Ib</b>  | 37 | 104.46 | 3.37 |
| <b>Ib</b>  | 38 | 104.46 | 3.37 |
| <b>Ib</b>  | 39 | 104.46 | 3.37 |
| <b>Ib</b>  | 40 | 104.63 | 3.53 |
| <b>Ib</b>  | 41 | 104.73 | 3.64 |
| <b>Ib</b>  | 42 | 104.84 | 3.74 |
| <b>Ib</b>  | 43 | 104.85 | 3.76 |
| <b>Ib</b>  | 44 | 104.94 | 3.85 |
| <b>Ib</b>  | 45 | 105.15 | 4.06 |
| <b>Ib</b>  | 46 | 105.32 | 4.22 |
| <b>Ib</b>  | 47 | 105.41 | 4.31 |
| <b>Ib</b>  | 48 | 105.45 | 4.36 |
| <b>Ib</b>  | 49 | 105.51 | 4.41 |
| <b>Ib</b>  | 50 | 105.64 | 4.55 |
| <b>Ib</b>  | 51 | 105.68 | 4.58 |
| <b>Ib</b>  | 52 | 105.77 | 4.67 |
| <b>Ib</b>  | 53 | 105.83 | 4.73 |
| <b>IIa</b> | 1  | 108.61 | 0.00 |
| <b>IIa</b> | 2  | 108.65 | 0.04 |
| <b>IIa</b> | 3  | 108.72 | 0.11 |
| <b>IIa</b> | 4  | 109.24 | 0.63 |
| <b>IIa</b> | 5  | 110.39 | 1.77 |
| <b>IIa</b> | 6  | 110.94 | 2.33 |
| <b>IIa</b> | 7  | 111.02 | 2.41 |
| <b>IIa</b> | 8  | 111.10 | 2.48 |

|             |    |        |      |
|-------------|----|--------|------|
| <b>IIa</b>  | 9  | 111.16 | 2.54 |
| <b>IIa</b>  | 10 | 111.97 | 3.36 |
| <b>IIa</b>  | 11 | 112.30 | 3.69 |
| <b>IIa</b>  | 12 | 112.46 | 3.85 |
| <b>IIa</b>  | 13 | 112.53 | 3.92 |
| <b>IIa</b>  | 14 | 112.95 | 4.34 |
| <b>IIa</b>  | 15 | 113.07 | 4.46 |
| <b>IIa</b>  | 16 | 113.10 | 4.49 |
| <b>IIa</b>  | 17 | 113.12 | 4.51 |
| <b>IIa</b>  | 18 | 113.20 | 4.58 |
| <b>IIa</b>  | 19 | 113.25 | 4.64 |
| <b>IIa</b>  | 20 | 113.48 | 4.86 |
| <b>IIa</b>  | 21 | 113.60 | 4.99 |
| <b>IIb</b>  | 1  | 106.87 | 0.00 |
| <b>IIb</b>  | 2  | 109.51 | 2.64 |
| <b>IIb</b>  | 3  | 109.89 | 3.02 |
| <b>IIb</b>  | 4  | 110.25 | 3.38 |
| <b>IIb</b>  | 5  | 110.47 | 3.60 |
| <b>IIb</b>  | 6  | 110.48 | 3.61 |
| <b>IIb</b>  | 7  | 110.69 | 3.82 |
| <b>IIb</b>  | 8  | 111.13 | 4.26 |
| <b>IIb</b>  | 9  | 111.16 | 4.28 |
| <b>IIb</b>  | 10 | 111.16 | 4.28 |
| <b>IIb</b>  | 11 | 111.47 | 4.60 |
| <b>IIb</b>  | 12 | 111.50 | 4.63 |
| <b>IIb</b>  | 13 | 111.71 | 4.84 |
| <b>IIb</b>  | 14 | 111.82 | 4.95 |
| <b>IIIa</b> | 1  | 110.80 | 0.00 |
| <b>IIIa</b> | 2  | 111.52 | 0.72 |
| <b>IIIa</b> | 3  | 112.91 | 2.12 |
| <b>IIIa</b> | 4  | 112.99 | 2.19 |
| <b>IIIa</b> | 5  | 113.23 | 2.43 |
| <b>IIIa</b> | 6  | 113.27 | 2.48 |
| <b>IIIa</b> | 7  | 113.58 | 2.78 |
| <b>IIIa</b> | 8  | 113.72 | 2.93 |
| <b>IIIa</b> | 9  | 113.77 | 2.97 |
| <b>IIIa</b> | 10 | 113.95 | 3.16 |
| <b>IIIa</b> | 11 | 114.26 | 3.46 |
| <b>IIIa</b> | 12 | 114.36 | 3.56 |
| <b>IIIa</b> | 13 | 114.38 | 3.58 |
| <b>IIIa</b> | 14 | 114.52 | 3.72 |
| <b>IIIa</b> | 15 | 114.55 | 3.75 |
| <b>IIIa</b> | 16 | 114.57 | 3.77 |

|             |    |        |      |
|-------------|----|--------|------|
| <b>IIIa</b> | 17 | 114.62 | 3.83 |
| <b>IIIa</b> | 18 | 115.00 | 4.20 |
| <b>IIIa</b> | 19 | 115.03 | 4.23 |
| <b>IIIa</b> | 20 | 115.04 | 4.24 |
| <b>IIIa</b> | 21 | 115.19 | 4.39 |
| <b>IIIa</b> | 22 | 115.23 | 4.44 |
| <b>IIIa</b> | 23 | 115.45 | 4.65 |
| <b>IIIa</b> | 24 | 115.46 | 4.66 |
| <b>IIIa</b> | 25 | 115.49 | 4.69 |
| <b>IIIa</b> | 26 | 115.49 | 4.69 |
| <b>IIIa</b> | 27 | 115.52 | 4.72 |
| <b>IIIa</b> | 28 | 115.53 | 4.73 |
| <b>IIIa</b> | 29 | 115.56 | 4.76 |
| <b>IIIa</b> | 30 | 115.63 | 4.83 |
| <b>IIIa</b> | 31 | 115.75 | 4.95 |
| <b>IIIb</b> | 1  | 111.67 | 0.00 |
| <b>IIIb</b> | 2  | 111.67 | 0.00 |
| <b>IIIb</b> | 3  | 112.02 | 0.36 |
| <b>IIIb</b> | 4  | 112.19 | 0.53 |
| <b>IIIb</b> | 5  | 112.28 | 0.62 |
| <b>IIIb</b> | 6  | 112.83 | 1.16 |
| <b>IIIb</b> | 7  | 113.24 | 1.58 |
| <b>IIIb</b> | 8  | 113.37 | 1.71 |
| <b>IIIb</b> | 9  | 113.47 | 1.81 |
| <b>IIIb</b> | 10 | 113.47 | 1.81 |
| <b>IIIb</b> | 11 | 113.72 | 2.05 |
| <b>IIIb</b> | 12 | 113.79 | 2.12 |
| <b>IIIb</b> | 13 | 113.79 | 2.12 |
| <b>IIIb</b> | 14 | 113.80 | 2.13 |
| <b>IIIb</b> | 15 | 113.86 | 2.20 |
| <b>IIIb</b> | 16 | 113.88 | 2.22 |
| <b>IIIb</b> | 17 | 113.90 | 2.23 |
| <b>IIIb</b> | 18 | 113.94 | 2.28 |
| <b>IIIb</b> | 19 | 114.15 | 2.49 |
| <b>IIIb</b> | 20 | 114.17 | 2.50 |
| <b>IIIb</b> | 21 | 114.21 | 2.55 |
| <b>IIIb</b> | 22 | 114.22 | 2.55 |
| <b>IIIb</b> | 23 | 114.22 | 2.55 |
| <b>IIIb</b> | 24 | 114.22 | 2.55 |
| <b>IIIb</b> | 25 | 114.26 | 2.59 |
| <b>IIIb</b> | 26 | 114.39 | 2.73 |
| <b>IIIb</b> | 27 | 114.44 | 2.77 |
| <b>IIIb</b> | 28 | 114.45 | 2.78 |

|             |    |        |      |
|-------------|----|--------|------|
| <b>IIIb</b> | 29 | 114.52 | 2.86 |
| <b>IIIb</b> | 30 | 114.55 | 2.88 |
| <b>IIIb</b> | 31 | 114.68 | 3.01 |
| <b>IIIb</b> | 32 | 114.72 | 3.06 |
| <b>IIIb</b> | 33 | 114.75 | 3.08 |
| <b>IIIb</b> | 34 | 114.75 | 3.08 |
| <b>IIIb</b> | 35 | 114.79 | 3.12 |
| <b>IIIb</b> | 36 | 114.89 | 3.23 |
| <b>IIIb</b> | 37 | 115.04 | 3.38 |
| <b>IIIb</b> | 38 | 115.09 | 3.42 |
| <b>IIIb</b> | 39 | 115.16 | 3.49 |
| <b>IIIb</b> | 40 | 115.24 | 3.57 |
| <b>IIIb</b> | 41 | 115.37 | 3.71 |
| <b>IIIb</b> | 42 | 115.38 | 3.71 |
| <b>IIIb</b> | 43 | 115.47 | 3.81 |
| <b>IIIb</b> | 44 | 115.61 | 3.95 |
| <b>IIIb</b> | 45 | 115.64 | 3.97 |
| <b>IIIb</b> | 46 | 115.65 | 3.99 |
| <b>IIIb</b> | 47 | 115.71 | 4.04 |
| <b>IIIb</b> | 48 | 115.89 | 4.23 |
| <b>IIIb</b> | 49 | 115.92 | 4.25 |
| <b>IIIb</b> | 50 | 115.93 | 4.27 |
| <b>IIIb</b> | 51 | 115.99 | 4.33 |
| <b>IIIb</b> | 52 | 115.99 | 4.33 |
| <b>IIIb</b> | 53 | 116.00 | 4.34 |
| <b>IIIb</b> | 54 | 116.12 | 4.46 |
| <b>IIIb</b> | 55 | 116.31 | 4.64 |
| <b>IIIb</b> | 56 | 116.32 | 4.65 |
| <b>IIIb</b> | 57 | 116.40 | 4.74 |
| <b>IIIb</b> | 58 | 116.51 | 4.84 |
| <b>IIIb</b> | 59 | 116.51 | 4.85 |
| <b>IIIb</b> | 60 | 116.52 | 4.85 |
| <b>IIIb</b> | 61 | 116.52 | 4.85 |
| <b>IIIb</b> | 62 | 116.53 | 4.87 |
| <b>IIIb</b> | 63 | 116.54 | 4.88 |
| <b>IIIb</b> | 64 | 116.56 | 4.89 |
| <b>IIIb</b> | 65 | 116.64 | 4.98 |
| <b>IIIb</b> | 66 | 116.64 | 4.98 |

---

**Table S2.** Energies of compounds I, II and III at B3LYP/6-311G (d, p) in gas phase.

| Configuration | Conformer | Structure                                                                           | E (Hartree)    | E (kcal/mol) | Population (%) |
|---------------|-----------|-------------------------------------------------------------------------------------|----------------|--------------|----------------|
| <b>Ia</b>     | 1         | 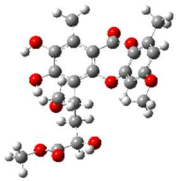   | -1605.12910673 | -1007233.71  | 95.47          |
| <b>Ia</b>     | 2         |    | -1605.12622941 | -1007231.91  | 4.53           |
| <b>Ib</b>     | 1         |    | -1605.12656489 | -1007232.12  | 4.85           |
| <b>Ib</b>     | 2         |   | -1605.12937477 | -1007233.88  | 95.15          |
| <b>IIa</b>    | 2         |  | -1605.12216137 | -1007229.36  | 72.45          |
| <b>IIa</b>    | 18        |  | -1605.12124832 | -1007228.78  | 27.55          |
| <b>IIb</b>    | 3         |  | -1605.11814092 | -1007226.83  | 50.11          |
| <b>IIb</b>    | 6         |  | -1605.11813694 | -1007226.83  | 49.89          |



**Table S3.** Standard orientations of compounds I, II and III at B3LYP/6-311G (d, p) level in gas phase.

| Conformer <b>Ia-1</b> |                  |                |                         |           |           |
|-----------------------|------------------|----------------|-------------------------|-----------|-----------|
| Center<br>Number      | Atomic<br>Number | Atomic<br>Type | Coordinates (Angstroms) |           |           |
|                       |                  |                | X                       | Y         | Z         |
| 1                     | 6                | 0              | -0.046049               | 3.349012  | -0.727929 |
| 2                     | 8                | 0              | 0.309909                | 4.525420  | -1.321784 |
| 3                     | 1                | 0              | 1.227024                | 4.430017  | -1.612412 |
| 4                     | 6                | 0              | 0.917032                | 2.334209  | -0.617620 |
| 5                     | 6                | 0              | 0.600659                | 1.096952  | -0.053142 |
| 6                     | 6                | 0              | 1.631060                | -0.012427 | 0.071685  |
| 7                     | 6                | 0              | 2.389152                | 0.023509  | 1.398091  |
| 8                     | 1                | 0              | 2.939915                | 0.961410  | 1.501739  |
| 9                     | 6                | 0              | 3.355327                | -1.160683 | 1.561086  |
| 10                    | 8                | 0              | 2.677572                | -2.383403 | 1.347541  |
| 11                    | 1                | 0              | 3.264388                | -2.914575 | 0.788078  |
| 12                    | 1                | 0              | 3.755187                | -1.125243 | 2.585134  |
| 13                    | 6                | 0              | 4.567791                | -1.102546 | 0.635632  |
| 14                    | 8                | 0              | 5.259761                | 0.031391  | 0.762496  |
| 15                    | 6                | 0              | 6.438313                | 0.149442  | -0.060309 |
| 16                    | 1                | 0              | 6.878441                | 1.108622  | 0.200474  |
| 17                    | 1                | 0              | 6.162930                | 0.125857  | -1.115278 |
| 18                    | 1                | 0              | 7.131446                | -0.665486 | 0.150354  |
| 19                    | 1                | 0              | 1.650550                | -0.022186 | 2.201418  |
| 20                    | 8                | 0              | 2.612790                | 0.066052  | -0.991339 |
| 21                    | 6                | 0              | 2.227451                | -0.612881 | -2.187999 |
| 22                    | 1                | 0              | 2.133128                | -1.686346 | -1.998140 |
| 23                    | 1                | 0              | 3.021374                | -0.447341 | -2.915726 |
| 24                    | 1                | 0              | 1.282631                | -0.223492 | -2.582036 |
| 25                    | 1                | 0              | 1.134099                | -0.979470 | 0.001613  |
| 26                    | 6                | 0              | -0.697243               | 0.928439  | 0.436514  |
| 27                    | 6                | 0              | -1.663250               | 1.937606  | 0.367074  |
| 28                    | 6                | 0              | -1.337470               | 3.178450  | -0.238396 |
| 29                    | 6                | 0              | -2.314269               | 4.317798  | -0.387736 |
| 30                    | 1                | 0              | -3.325063               | 3.961437  | -0.583885 |
| 31                    | 1                | 0              | -1.997994               | 4.972219  | -1.198953 |
| 32                    | 1                | 0              | -2.362446               | 4.908131  | 0.530684  |
| 33                    | 8                | 0              | -0.960779               | -0.277579 | 1.079790  |
| 34                    | 6                | 0              | -1.956034               | -1.049301 | 0.496501  |
| 35                    | 6                | 0              | -3.254520               | -0.570079 | 0.436252  |
| 36                    | 8                | 0              | -3.643282               | 0.602977  | 1.058952  |
| 37                    | 6                | 0              | -2.975510               | 1.806086  | 1.061830  |
| 38                    | 6                | 0              | -1.623653               | -2.314185 | 0.015855  |
| 39                    | 1                | 0              | -0.602330               | -2.651130 | 0.121399  |

|    |   |   |           |           |           |
|----|---|---|-----------|-----------|-----------|
| 40 | 6 | 0 | -2.628598 | -3.104938 | -0.540595 |
| 41 | 8 | 0 | -2.435814 | -4.360917 | -1.033388 |
| 42 | 6 | 0 | -1.138408 | -4.931446 | -0.937674 |
| 43 | 1 | 0 | -0.809645 | -5.010129 | 0.104335  |
| 44 | 1 | 0 | -0.402411 | -4.352655 | -1.507601 |
| 45 | 1 | 0 | -1.219754 | -5.928707 | -1.366608 |
| 46 | 6 | 0 | -3.936570 | -2.611549 | -0.623365 |
| 47 | 1 | 0 | -4.694856 | -3.246706 | -1.064902 |
| 48 | 6 | 0 | -4.269226 | -1.353746 | -0.135486 |
| 49 | 6 | 0 | -5.683758 | -0.838013 | -0.177918 |
| 50 | 1 | 0 | -5.746815 | 0.096618  | -0.741881 |
| 51 | 1 | 0 | -6.050142 | -0.620774 | 0.828707  |
| 52 | 1 | 0 | -6.347891 | -1.568139 | -0.642184 |
| 53 | 8 | 0 | -3.516676 | 2.714729  | 1.630440  |
| 54 | 8 | 0 | 2.149208  | 2.646897  | -1.113278 |
| 55 | 1 | 0 | 2.659678  | 1.813404  | -1.170698 |
| 56 | 8 | 0 | 4.885459  | -2.027266 | -0.077899 |

---

**Conformer Ia-2**

---

| Center<br>Number | Atomic<br>Number | Atomic<br>Type | Coordinates (Angstroms) |           |           |
|------------------|------------------|----------------|-------------------------|-----------|-----------|
|                  |                  |                | X                       | Y         | Z         |
| 1                | 6                | 0              | -0.640144               | 3.307276  | 0.936507  |
| 2                | 8                | 0              | -1.051106               | 4.491461  | 1.475938  |
| 3                | 1                | 0              | -1.724856               | 4.282159  | 2.137280  |
| 4                | 6                | 0              | -1.256308               | 2.123153  | 1.366575  |
| 5                | 6                | 0              | -0.859166               | 0.876139  | 0.874880  |
| 6                | 6                | 0              | -1.530826               | -0.397694 | 1.369316  |
| 7                | 6                | 0              | -2.827369               | -0.747679 | 0.624230  |
| 8                | 1                | 0              | -3.421774               | -1.386540 | 1.283763  |
| 9                | 6                | 0              | -2.539906               | -1.532057 | -0.668103 |
| 10               | 8                | 0              | -1.882768               | -2.748977 | -0.366613 |
| 11               | 1                | 0              | -2.490687               | -3.453847 | -0.636368 |
| 12               | 1                | 0              | -1.903033               | -0.936776 | -1.330404 |
| 13               | 6                | 0              | -3.831683               | -1.836926 | -1.415065 |
| 14               | 8                | 0              | -4.455655               | -0.734398 | -1.835914 |
| 15               | 6                | 0              | -5.690482               | -0.937649 | -2.556554 |
| 16               | 1                | 0              | -6.036196               | 0.058155  | -2.821549 |
| 17               | 1                | 0              | -6.418770               | -1.444760 | -1.922801 |
| 18               | 1                | 0              | -5.510681               | -1.535695 | -3.450324 |
| 19               | 1                | 0              | -3.402414               | 0.153693  | 0.401329  |
| 20               | 8                | 0              | -1.884288               | -0.271883 | 2.768220  |
| 21               | 6                | 0              | -0.781311               | -0.435959 | 3.659691  |
| 22               | 1                | 0              | -0.349100               | -1.436410 | 3.550495  |
| 23               | 1                | 0              | -1.174353               | -0.321789 | 4.669661  |

---

|    |   |   |           |           |           |
|----|---|---|-----------|-----------|-----------|
| 24 | 1 | 0 | -0.001875 | 0.313592  | 3.483884  |
| 25 | 1 | 0 | -0.845485 | -1.240321 | 1.268445  |
| 26 | 6 | 0 | 0.150646  | 0.864658  | -0.090548 |
| 27 | 6 | 0 | 0.765822  | 2.035022  | -0.548023 |
| 28 | 6 | 0 | 0.370282  | 3.290126  | -0.021231 |
| 29 | 6 | 0 | 0.987300  | 4.602731  | -0.434281 |
| 30 | 1 | 0 | 2.056987  | 4.507035  | -0.619098 |
| 31 | 1 | 0 | 0.820127  | 5.350177  | 0.340023  |
| 32 | 1 | 0 | 0.539744  | 4.963552  | -1.363651 |
| 33 | 8 | 0 | 0.460297  | -0.368160 | -0.658269 |
| 34 | 6 | 0 | 1.759444  | -0.807198 | -0.447237 |
| 35 | 6 | 0 | 2.825370  | -0.078271 | -0.949803 |
| 36 | 8 | 0 | 2.656536  | 1.007044  | -1.792132 |
| 37 | 6 | 0 | 1.721569  | 2.011547  | -1.691920 |
| 38 | 6 | 0 | 1.952567  | -2.004933 | 0.236921  |
| 39 | 1 | 0 | 1.078701  | -2.553896 | 0.557046  |
| 40 | 6 | 0 | 3.255068  | -2.464737 | 0.427271  |
| 41 | 8 | 0 | 3.575697  | -3.624421 | 1.067513  |
| 42 | 6 | 0 | 2.517978  | -4.452541 | 1.530098  |
| 43 | 1 | 0 | 1.873027  | -4.778208 | 0.706800  |
| 44 | 1 | 0 | 1.909963  | -3.942179 | 2.285987  |
| 45 | 1 | 0 | 2.995534  | -5.321030 | 1.980485  |
| 46 | 6 | 0 | 4.335222  | -1.712844 | -0.051802 |
| 47 | 1 | 0 | 5.335946  | -2.092408 | 0.115215  |
| 48 | 6 | 0 | 4.140636  | -0.526318 | -0.748441 |
| 49 | 6 | 0 | 5.296246  | 0.257012  | -1.313980 |
| 50 | 1 | 0 | 5.319264  | 1.273519  | -0.911644 |
| 51 | 1 | 0 | 5.208805  | 0.352326  | -2.399372 |
| 52 | 1 | 0 | 6.244275  | -0.229275 | -1.080653 |
| 53 | 8 | 0 | 1.751432  | 2.854808  | -2.546312 |
| 54 | 8 | 0 | -2.241311 | 2.285699  | 2.296794  |
| 55 | 1 | 0 | -2.408731 | 1.409670  | 2.702711  |
| 56 | 8 | 0 | -4.231353 | -2.964659 | -1.594006 |

---

Conformer **Ib-1**

---

| Center<br>Number | Atomic<br>Number | Atomic<br>Type | Coordinates (Angstroms) |           |           |
|------------------|------------------|----------------|-------------------------|-----------|-----------|
|                  |                  |                | X                       | Y         | Z         |
| 1                | 6                | 0              | -1.683515               | -3.284213 | 0.508280  |
| 2                | 8                | 0              | -2.066853               | -4.503945 | 0.983914  |
| 3                | 1                | 0              | -1.284918               | -4.918513 | 1.372985  |
| 4                | 6                | 0              | -0.335490               | -2.910936 | 0.615172  |
| 5                | 6                | 0              | 0.103614                | -1.662891 | 0.172277  |
| 6                | 6                | 0              | 1.561149                | -1.255024 | 0.258466  |
| 7                | 6                | 0              | 2.382887                | -1.735403 | -0.944834 |

---

|    |   |   |           |           |           |
|----|---|---|-----------|-----------|-----------|
| 8  | 1 | 0 | 2.404725  | -2.829124 | -0.962346 |
| 9  | 6 | 0 | 3.841879  | -1.228086 | -0.969112 |
| 10 | 8 | 0 | 4.624393  | -1.746094 | 0.082336  |
| 11 | 1 | 0 | 4.073500  | -1.728923 | 0.876345  |
| 12 | 1 | 0 | 4.304335  | -1.555917 | -1.901806 |
| 13 | 6 | 0 | 3.853758  | 0.305350  | -0.962783 |
| 14 | 8 | 0 | 3.951716  | 0.793740  | -2.209374 |
| 15 | 6 | 0 | 3.896998  | 2.228390  | -2.342851 |
| 16 | 1 | 0 | 4.098686  | 2.429844  | -3.392010 |
| 17 | 1 | 0 | 4.647286  | 2.697446  | -1.706120 |
| 18 | 1 | 0 | 2.905899  | 2.594114  | -2.069474 |
| 19 | 1 | 0 | 1.868910  | -1.402725 | -1.850709 |
| 20 | 8 | 0 | 2.183258  | -1.793906 | 1.460102  |
| 21 | 6 | 0 | 1.897786  | -1.033123 | 2.642322  |
| 22 | 1 | 0 | 2.321572  | -0.029392 | 2.548352  |
| 23 | 1 | 0 | 2.371687  | -1.555422 | 3.472861  |
| 24 | 1 | 0 | 0.819798  | -0.967681 | 2.818476  |
| 25 | 1 | 0 | 1.618168  | -0.169770 | 0.318796  |
| 26 | 6 | 0 | -0.843161 | -0.811880 | -0.402340 |
| 27 | 6 | 0 | -2.185585 | -1.175424 | -0.549729 |
| 28 | 6 | 0 | -2.623097 | -2.439795 | -0.078784 |
| 29 | 6 | 0 | -4.051184 | -2.915901 | -0.168434 |
| 30 | 1 | 0 | -4.759917 | -2.098003 | -0.044476 |
| 31 | 1 | 0 | -4.236527 | -3.674383 | 0.591001  |
| 32 | 1 | 0 | -4.248984 | -3.357585 | -1.148480 |
| 33 | 8 | 0 | -0.367745 | 0.400874  | -0.894980 |
| 34 | 6 | 0 | -0.916029 | 1.525063  | -0.289198 |
| 35 | 6 | 0 | -2.268817 | 1.786266  | -0.430564 |
| 36 | 8 | 0 | -3.085307 | 1.032950  | -1.256012 |
| 37 | 6 | 0 | -3.130742 | -0.340218 | -1.345581 |
| 38 | 6 | 0 | -0.077986 | 2.379890  | 0.424471  |
| 39 | 1 | 0 | 0.973314  | 2.138480  | 0.495054  |
| 40 | 6 | 0 | -0.626267 | 3.526203  | 1.000799  |
| 41 | 8 | 0 | 0.084950  | 4.442575  | 1.713887  |
| 42 | 6 | 0 | 1.479993  | 4.229706  | 1.887838  |
| 43 | 1 | 0 | 1.679203  | 3.301175  | 2.434050  |
| 44 | 1 | 0 | 1.838331  | 5.075208  | 2.472268  |
| 45 | 1 | 0 | 2.007014  | 4.201975  | 0.928282  |
| 46 | 6 | 0 | -1.995975 | 3.786211  | 0.865438  |
| 47 | 1 | 0 | -2.392530 | 4.683395  | 1.324967  |
| 48 | 6 | 0 | -2.829847 | 2.933761  | 0.151988  |
| 49 | 6 | 0 | -4.295630 | 3.228853  | -0.029011 |
| 50 | 1 | 0 | -4.913732 | 2.430444  | 0.390794  |

|    |   |   |           |           |           |
|----|---|---|-----------|-----------|-----------|
| 51 | 1 | 0 | -4.551620 | 3.297458  | -1.089303 |
| 52 | 1 | 0 | -4.564585 | 4.166940  | 0.458009  |
| 53 | 8 | 0 | -3.963244 | -0.800971 | -2.077374 |
| 54 | 8 | 0 | 0.485360  | -3.837734 | 1.189743  |
| 55 | 1 | 0 | 1.321880  | -3.392178 | 1.425105  |
| 56 | 8 | 0 | 3.749732  | 0.992805  | 0.027056  |

---

Conformer **Ib-2**

---

| Center<br>Number | Atomic<br>Number | Atomic<br>Type | Coordinates (Angstroms) |           |           |
|------------------|------------------|----------------|-------------------------|-----------|-----------|
|                  |                  |                | X                       | Y         | Z         |
| 1                | 6                | 0              | 0.449419                | 3.471274  | 0.788576  |
| 2                | 8                | 0              | 0.340508                | 4.718286  | 1.332778  |
| 3                | 1                | 0              | -0.461532               | 4.723433  | 1.872650  |
| 4                | 6                | 0              | -0.560026               | 2.532656  | 1.054475  |
| 5                | 6                | 0              | -0.483613               | 1.231393  | 0.555169  |
| 6                | 6                | 0              | -1.554159               | 0.192137  | 0.844965  |
| 7                | 6                | 0              | -2.640905               | 0.137168  | -0.229026 |
| 8                | 1                | 0              | -3.190441               | 1.081913  | -0.259346 |
| 9                | 6                | 0              | -3.614339               | -1.029188 | 0.024809  |
| 10               | 8                | 0              | -2.925065               | -2.262159 | 0.120778  |
| 11               | 1                | 0              | -3.141107               | -2.752630 | -0.686733 |
| 12               | 1                | 0              | -4.140166               | -0.846705 | 0.966743  |
| 13               | 6                | 0              | -4.642784               | -1.118897 | -1.093006 |
| 14               | 8                | 0              | -5.459548               | -0.062548 | -1.126408 |
| 15               | 6                | 0              | -6.442038               | -0.052739 | -2.185201 |
| 16               | 1                | 0              | -7.004008               | 0.867484  | -2.048050 |
| 17               | 1                | 0              | -7.095280               | -0.921758 | -2.101514 |
| 18               | 1                | 0              | -5.949037               | -0.063635 | -3.157699 |
| 19               | 1                | 0              | -2.149213               | -0.004512 | -1.195377 |
| 20               | 8                | 0              | -2.208503               | 0.450211  | 2.109296  |
| 21               | 6                | 0              | -1.517466               | -0.090252 | 3.237214  |
| 22               | 1                | 0              | -2.092703               | 0.185584  | 4.120859  |
| 23               | 1                | 0              | -0.503786               | 0.316842  | 3.320871  |
| 24               | 1                | 0              | -1.466842               | -1.181166 | 3.163698  |
| 25               | 1                | 0              | -1.091173               | -0.793513 | 0.896887  |
| 26               | 6                | 0              | 0.608216                | 0.920079  | -0.259386 |
| 27               | 6                | 0              | 1.610694                | 1.846921  | -0.560688 |
| 28               | 6                | 0              | 1.539265                | 3.155483  | -0.017042 |
| 29               | 6                | 0              | 2.580656                | 4.219373  | -0.259157 |
| 30               | 1                | 0              | 3.584736                | 3.799120  | -0.309164 |
| 31               | 1                | 0              | 2.539895                | 4.964330  | 0.534315  |
| 32               | 1                | 0              | 2.403722                | 4.722901  | -1.212816 |
| 33               | 8                | 0              | 0.605768                | -0.349412 | -0.831449 |
| 34               | 6                | 0              | 1.674909                | -1.158027 | -0.471995 |

---

|    |   |   |           |           |           |
|----|---|---|-----------|-----------|-----------|
| 35 | 6 | 0 | 2.965155  | -0.788231 | -0.815412 |
| 36 | 8 | 0 | 3.235860  | 0.297935  | -1.629297 |
| 37 | 6 | 0 | 2.665612  | 1.549554  | -1.570661 |
| 38 | 6 | 0 | 1.412419  | -2.349200 | 0.201337  |
| 39 | 1 | 0 | 0.383588  | -2.602348 | 0.414595  |
| 40 | 6 | 0 | 2.482102  | -3.178753 | 0.536961  |
| 41 | 8 | 0 | 2.356874  | -4.371220 | 1.184526  |
| 42 | 6 | 0 | 1.051215  | -4.829233 | 1.507777  |
| 43 | 1 | 0 | 0.542355  | -4.142120 | 2.193256  |
| 44 | 1 | 0 | 1.186841  | -5.791337 | 1.998715  |
| 45 | 1 | 0 | 0.438551  | -4.963248 | 0.609639  |
| 46 | 6 | 0 | 3.788727  | -2.795300 | 0.209915  |
| 47 | 1 | 0 | 4.599592  | -3.458176 | 0.486478  |
| 48 | 6 | 0 | 4.048683  | -1.611541 | -0.470092 |
| 49 | 6 | 0 | 5.447713  | -1.217688 | -0.865521 |
| 50 | 1 | 0 | 5.726746  | -0.256717 | -0.424676 |
| 51 | 1 | 0 | 5.528340  | -1.099506 | -1.949101 |
| 52 | 1 | 0 | 6.167686  | -1.969808 | -0.540637 |
| 53 | 8 | 0 | 3.079946  | 2.360502  | -2.353343 |
| 54 | 8 | 0 | -1.581173 | 2.984958  | 1.837525  |
| 55 | 1 | 0 | -2.109901 | 2.205671  | 2.106783  |
| 56 | 8 | 0 | -4.685117 | -2.046802 | -1.867461 |

Conformer **IIa-2**

| Center<br>Number | Atomic<br>Number | Atomic<br>Type | Coordinates (Angstroms) |           |           |
|------------------|------------------|----------------|-------------------------|-----------|-----------|
|                  |                  |                | X                       | Y         | Z         |
| 1                | 6                | 0              | 0.476520                | 3.120910  | -0.416441 |
| 2                | 8                | 0              | 0.280410                | 4.388540  | -0.906041 |
| 3                | 6                | 0              | -0.183180               | 4.480090  | -2.259381 |
| 4                | 1                | 0              | -0.220620               | 5.544140  | -2.491071 |
| 5                | 1                | 0              | -1.179100               | 4.047211  | -2.367641 |
| 6                | 1                | 0              | 0.515170                | 3.984050  | -2.942901 |
| 7                | 6                | 0              | -0.632660               | 2.286820  | -0.183451 |
| 8                | 6                | 0              | -0.457620               | 0.998320  | 0.341579  |
| 9                | 6                | 0              | -1.632681               | 0.045441  | 0.476109  |
| 10               | 6                | 0              | -2.015291               | -0.590919 | -0.865011 |
| 11               | 1                | 0              | -2.477381               | 0.158281  | -1.512601 |
| 12               | 6                | 0              | -2.951601               | -1.803729 | -0.727271 |
| 13               | 8                | 0              | -2.337901               | -2.823439 | 0.042779  |
| 14               | 1                | 0              | -2.934131               | -2.990489 | 0.789629  |
| 15               | 1                | 0              | -3.160291               | -2.184949 | -1.734511 |
| 16               | 6                | 0              | -4.294981               | -1.453049 | -0.095911 |
| 17               | 8                | 0              | -5.010491               | -0.620989 | -0.850941 |
| 18               | 6                | 0              | -6.278391               | -0.200779 | -0.305211 |

|    |   |   |           |           |           |
|----|---|---|-----------|-----------|-----------|
| 19 | 1 | 0 | -6.118070 | 0.366001  | 0.612369  |
| 20 | 1 | 0 | -6.906201 | -1.066468 | -0.093471 |
| 21 | 1 | 0 | -6.728580 | 0.426671  | -1.070181 |
| 22 | 1 | 0 | -1.103931 | -0.934230 | -1.359021 |
| 23 | 8 | 0 | -2.812230 | 0.728581  | 0.963289  |
| 24 | 6 | 0 | -2.811900 | 0.939431  | 2.377279  |
| 25 | 1 | 0 | -2.843241 | -0.019839 | 2.903449  |
| 26 | 1 | 0 | -3.710980 | 1.508561  | 2.611659  |
| 27 | 1 | 0 | -1.929650 | 1.504331  | 2.695599  |
| 28 | 1 | 0 | -1.370531 | -0.745349 | 1.180579  |
| 29 | 6 | 0 | 0.834920  | 0.601210  | 0.682659  |
| 30 | 6 | 0 | 1.947650  | 1.429290  | 0.505289  |
| 31 | 6 | 0 | 1.767360  | 2.713370  | -0.067321 |
| 32 | 6 | 0 | 2.914470  | 3.666510  | -0.294171 |
| 33 | 1 | 0 | 3.792830  | 3.150900  | -0.684571 |
| 34 | 1 | 0 | 3.218320  | 4.127660  | 0.647839  |
| 35 | 1 | 0 | 2.615960  | 4.453540  | -0.982761 |
| 36 | 8 | 0 | 0.974319  | -0.655520 | 1.256999  |
| 37 | 6 | 0 | 1.734779  | -1.547070 | 0.511069  |
| 38 | 6 | 0 | 3.085999  | -1.297900 | 0.318859  |
| 39 | 8 | 0 | 3.735469  | -0.244570 | 0.941519  |
| 40 | 6 | 0 | 3.287080  | 1.052750  | 1.045329  |
| 41 | 6 | 0 | 1.125319  | -2.682900 | -0.006981 |
| 42 | 1 | 0 | 0.064979  | -2.843400 | 0.157069  |
| 43 | 6 | 0 | 1.902659  | -3.590170 | -0.724601 |
| 44 | 8 | 0 | 1.377859  | -4.730750 | -1.262141 |
| 45 | 1 | 0 | 0.441259  | -4.779660 | -1.041871 |
| 46 | 6 | 0 | 3.262779  | -3.344570 | -0.925041 |
| 47 | 1 | 0 | 3.842789  | -4.066120 | -1.487561 |
| 48 | 6 | 0 | 3.872289  | -2.203620 | -0.406411 |
| 49 | 6 | 0 | 5.345459  | -1.945771 | -0.586471 |
| 50 | 1 | 0 | 5.849339  | -1.866261 | 0.380249  |
| 51 | 1 | 0 | 5.520479  | -1.001241 | -1.108901 |
| 52 | 1 | 0 | 5.811819  | -2.748831 | -1.158571 |
| 53 | 8 | 0 | 4.031900  | 1.835200  | 1.569799  |
| 54 | 8 | 0 | -1.862910 | 2.766961  | -0.493231 |
| 55 | 1 | 0 | -2.520140 | 2.186831  | -0.061911 |
| 56 | 8 | 0 | -4.659421 | -1.925679 | 0.956979  |

---

Conformer **IIa-18**

---

| Center<br>Number | Atomic<br>Number | Atomic<br>Type | Coordinates (Angstroms) |          |          |
|------------------|------------------|----------------|-------------------------|----------|----------|
|                  |                  |                | X                       | Y        | Z        |
| 1                | 6                | 0              | 0.089100                | 3.028971 | 0.319230 |
| 2                | 8                | 0              | -0.268940               | 4.295831 | 0.711810 |

---

|    |   |   |           |           |           |
|----|---|---|-----------|-----------|-----------|
| 3  | 6 | 0 | -0.528090 | 4.472811  | 2.109730  |
| 4  | 1 | 0 | -1.386390 | 3.880301  | 2.431040  |
| 5  | 1 | 0 | -0.746570 | 5.532141  | 2.242110  |
| 6  | 1 | 0 | 0.353080  | 4.207341  | 2.705080  |
| 7  | 6 | 0 | -0.877970 | 2.005081  | 0.329430  |
| 8  | 6 | 0 | -0.548980 | 0.709191  | -0.098290 |
| 9  | 6 | 0 | -1.594970 | -0.393389 | -0.152750 |
| 10 | 6 | 0 | -2.402420 | -0.364939 | -1.451640 |
| 11 | 1 | 0 | -2.925090 | 0.588321  | -1.559560 |
| 12 | 6 | 0 | -3.412560 | -1.518749 | -1.552260 |
| 13 | 8 | 0 | -2.767660 | -2.757369 | -1.341060 |
| 14 | 1 | 0 | -3.338380 | -3.254459 | -0.735790 |
| 15 | 1 | 0 | -3.849650 | -1.488499 | -2.561480 |
| 16 | 6 | 0 | -4.588620 | -1.400489 | -0.586220 |
| 17 | 8 | 0 | -5.241750 | -0.242229 | -0.709290 |
| 18 | 6 | 0 | -6.388410 | -0.068319 | 0.147410  |
| 19 | 1 | 0 | -6.799580 | 0.903791  | -0.112930 |
| 20 | 1 | 0 | -6.082270 | -0.089229 | 1.193970  |
| 21 | 1 | 0 | -7.118370 | -0.858639 | -0.030570 |
| 22 | 1 | 0 | -1.697150 | -0.454159 | -2.281180 |
| 23 | 8 | 0 | -2.539310 | -0.274599 | 0.937370  |
| 24 | 6 | 0 | -2.095650 | -0.863449 | 2.159690  |
| 25 | 1 | 0 | -1.158430 | -0.412669 | 2.503910  |
| 26 | 1 | 0 | -1.957590 | -1.941669 | 2.032740  |
| 27 | 1 | 0 | -2.877430 | -0.686799 | 2.897770  |
| 28 | 1 | 0 | -1.111080 | -1.366979 | -0.083370 |
| 29 | 6 | 0 | 0.750120  | 0.484891  | -0.553660 |
| 30 | 6 | 0 | 1.711890  | 1.499491  | -0.625160 |
| 31 | 6 | 0 | 1.374910  | 2.801061  | -0.173500 |
| 32 | 6 | 0 | 2.350250  | 3.951591  | -0.212420 |
| 33 | 1 | 0 | 2.445950  | 4.335121  | -1.230220 |
| 34 | 1 | 0 | 3.349300  | 3.643581  | 0.098690  |
| 35 | 1 | 0 | 2.000650  | 4.758681  | 0.427300  |
| 36 | 8 | 0 | 1.030130  | -0.795569 | -1.018340 |
| 37 | 6 | 0 | 2.039240  | -1.453979 | -0.331500 |
| 38 | 6 | 0 | 3.338690  | -0.960729 | -0.384920 |
| 39 | 8 | 0 | 3.687630  | 0.101371  | -1.198510 |
| 40 | 6 | 0 | 3.008840  | 1.293741  | -1.329540 |
| 41 | 6 | 0 | 1.736440  | -2.610189 | 0.371980  |
| 42 | 1 | 0 | 0.725650  | -2.994469 | 0.390010  |
| 43 | 6 | 0 | 2.762550  | -3.286419 | 1.029340  |
| 44 | 8 | 0 | 2.426800  | -4.424299 | 1.706800  |
| 45 | 1 | 0 | 3.218240  | -4.803509 | 2.102300  |

---



|    |   |   |           |           |           |
|----|---|---|-----------|-----------|-----------|
| 46 | 6 | 0 | 4.066460  | -2.790058 | 0.986160  |
| 47 | 1 | 0 | 4.862040  | -3.320638 | 1.501250  |
| 48 | 6 | 0 | 4.374430  | -1.627588 | 0.276770  |
| 49 | 6 | 0 | 5.784860  | -1.106488 | 0.189690  |
| 50 | 1 | 0 | 6.115230  | -1.046908 | -0.850370 |
| 51 | 1 | 0 | 6.472870  | -1.751388 | 0.738360  |
| 52 | 1 | 0 | 5.858050  | -0.095238 | 0.599030  |
| 53 | 8 | 0 | 3.527860  | 2.125241  | -2.022790 |
| 54 | 8 | 0 | -2.119480 | 2.324191  | 0.764690  |
| 55 | 1 | 0 | -2.602230 | 1.484901  | 0.905430  |
| 56 | 8 | 0 | -4.916720 | -2.300229 | 0.153190  |

Conformer **IIb-3**

| Center<br>Number | Atomic<br>Number | Atomic<br>Type | Coordinates (Angstroms) |           |           |
|------------------|------------------|----------------|-------------------------|-----------|-----------|
|                  |                  |                | X                       | Y         | Z         |
| 1                | 6                | 0              | -2.466309               | -2.347301 | 0.326950  |
| 2                | 8                | 0              | -3.260069               | -3.379581 | 0.762320  |
| 3                | 6                | 0              | -3.236358               | -4.567151 | -0.040620 |
| 4                | 1                | 0              | -3.951068               | -5.251811 | 0.414900  |
| 5                | 1                | 0              | -2.244098               | -5.022711 | -0.040400 |
| 6                | 1                | 0              | -3.546738               | -4.347701 | -1.068030 |
| 7                | 6                | 0              | -1.070969               | -2.442970 | 0.494590  |
| 8                | 6                | 0              | -0.239689               | -1.370870 | 0.140410  |
| 9                | 6                | 0              | 1.269721                | -1.434410 | 0.290910  |
| 10               | 6                | 0              | 1.970011                | -2.051200 | -0.927270 |
| 11               | 1                | 0              | 1.687821                | -3.104230 | -1.020800 |
| 12               | 6                | 0              | 3.512041                | -1.970499 | -0.883670 |
| 13               | 8                | 0              | 4.076691                | -2.735879 | 0.156460  |
| 14               | 1                | 0              | 3.499521                | -2.635619 | 0.925680  |
| 15               | 1                | 0              | 3.904991                | -2.366359 | -1.821980 |
| 16               | 6                | 0              | 3.947741                | -0.502499 | -0.787820 |
| 17               | 8                | 0              | 4.263681                | -0.011399 | -1.995930 |
| 18               | 6                | 0              | 4.622410                | 1.384581  | -2.048110 |
| 19               | 1                | 0              | 3.757600                | 2.004881  | -1.807150 |
| 20               | 1                | 0              | 4.943230                | 1.563181  | -3.071380 |
| 21               | 1                | 0              | 5.429130                | 1.594881  | -1.345790 |
| 22               | 1                | 0              | 1.606081                | -1.532680 | -1.818370 |
| 23               | 8                | 0              | 1.653481                | -2.215020 | 1.457430  |
| 24               | 6                | 0              | 1.530621                | -1.497590 | 2.693980  |
| 25               | 1                | 0              | 2.218851                | -0.647700 | 2.700270  |
| 26               | 1                | 0              | 1.798871                | -2.194490 | 3.487120  |
| 27               | 1                | 0              | 0.505271                | -1.147980 | 2.846370  |
| 28               | 1                | 0              | 1.646461                | -0.424770 | 0.439040  |
| 29               | 6                | 0              | -0.837719               | -0.227630 | -0.390270 |

|    |   |   |           |           |           |
|----|---|---|-----------|-----------|-----------|
| 30 | 6 | 0 | -2.217789 | -0.113881 | -0.579350 |
| 31 | 6 | 0 | -3.052549 | -1.201181 | -0.212460 |
| 32 | 6 | 0 | -4.554219 | -1.155281 | -0.353410 |
| 33 | 1 | 0 | -4.849629 | -1.312301 | -1.393020 |
| 34 | 1 | 0 | -4.952919 | -0.182291 | -0.064090 |
| 35 | 1 | 0 | -5.004729 | -1.927381 | 0.266520  |
| 36 | 8 | 0 | 0.025040  | 0.785890  | -0.799090 |
| 37 | 6 | 0 | -0.131950 | 1.990190  | -0.124970 |
| 38 | 6 | 0 | -1.319940 | 2.696000  | -0.246620 |
| 39 | 8 | 0 | -2.320700 | 2.310699  | -1.121430 |
| 40 | 6 | 0 | -2.810730 | 1.038449  | -1.315350 |
| 41 | 6 | 0 | 0.924590  | 2.479100  | 0.636500  |
| 42 | 1 | 0 | 1.847990  | 1.912860  | 0.696960  |
| 43 | 6 | 0 | 0.776210  | 3.705660  | 1.282030  |
| 44 | 8 | 0 | 1.767210  | 4.259220  | 2.040760  |
| 45 | 1 | 0 | 2.539260  | 3.683890  | 2.027860  |
| 46 | 6 | 0 | -0.422891 | 4.413100  | 1.173450  |
| 47 | 1 | 0 | -0.512041 | 5.361790  | 1.688490  |
| 48 | 6 | 0 | -1.479560 | 3.925849  | 0.408020  |
| 49 | 6 | 0 | -2.761251 | 4.700459  | 0.249390  |
| 50 | 1 | 0 | -2.715711 | 5.641849  | 0.798210  |
| 51 | 1 | 0 | -3.616920 | 4.126729  | 0.615830  |
| 52 | 1 | 0 | -2.958331 | 4.917109  | -0.803590 |
| 53 | 8 | 0 | -3.726680 | 0.932869  | -2.084560 |
| 54 | 8 | 0 | -0.585369 | -3.591380 | 1.021820  |
| 55 | 1 | 0 | 0.347411  | -3.436370 | 1.263740  |
| 56 | 8 | 0 | 3.970611  | 0.147291  | 0.232950  |

---

Conformer **IIIb-6**

---

| Center<br>Number | Atomic<br>Number | Atomic<br>Type | Coordinates (Angstroms) |           |           |
|------------------|------------------|----------------|-------------------------|-----------|-----------|
|                  |                  |                | X                       | Y         | Z         |
| 1                | 6                | 0              | -2.364201               | -2.316779 | -0.643600 |
| 2                | 8                | 0              | -3.035287               | -3.328192 | -1.285890 |
| 3                | 6                | 0              | -3.262493               | -4.513873 | -0.513140 |
| 4                | 1                | 0              | -2.319171               | -4.990709 | -0.239380 |
| 5                | 1                | 0              | -3.836250               | -5.184165 | -1.152390 |
| 6                | 1                | 0              | -3.842314               | -4.285855 | 0.388070  |
| 7                | 6                | 0              | -0.976141               | -2.437314 | -0.443320 |
| 8                | 6                | 0              | -0.242765               | -1.379961 | 0.116680  |
| 9                | 6                | 0              | 1.270736                | -1.464056 | 0.235700  |
| 10               | 6                | 0              | 1.970644                | -1.161573 | -1.097160 |
| 11               | 1                | 0              | 1.611337                | -1.848234 | -1.868390 |
| 12               | 6                | 0              | 3.511985                | -1.282337 | -1.059880 |
| 13               | 8                | 0              | 3.953090                | -2.616575 | -1.000300 |

---

|    |   |   |           |           |           |
|----|---|---|-----------|-----------|-----------|
| 14 | 1 | 0 | 3.534971  | -3.004737 | -0.220430 |
| 15 | 1 | 0 | 3.906693  | -0.863356 | -1.987790 |
| 16 | 6 | 0 | 4.088642  | -0.464805 | 0.101020  |
| 17 | 8 | 0 | 4.164287  | 0.843515  | -0.216980 |
| 18 | 6 | 0 | 4.686843  | 1.721227  | 0.803410  |
| 19 | 1 | 0 | 4.117974  | 1.615505  | 1.727660  |
| 20 | 1 | 0 | 4.584720  | 2.725177  | 0.398500  |
| 21 | 1 | 0 | 5.734004  | 1.485681  | 0.997400  |
| 22 | 1 | 0 | 1.686011  | -0.151714 | -1.402020 |
| 23 | 8 | 0 | 1.686511  | -2.791204 | 0.652480  |
| 24 | 6 | 0 | 1.553391  | -3.022565 | 2.060310  |
| 25 | 1 | 0 | 2.225569  | -2.358742 | 2.611020  |
| 26 | 1 | 0 | 1.840265  | -4.058933 | 2.235280  |
| 27 | 1 | 0 | 0.520971  | -2.868308 | 2.389710  |
| 28 | 1 | 0 | 1.603013  | -0.754524 | 0.995850  |
| 29 | 6 | 0 | -0.936959 | -0.229064 | 0.491670  |
| 30 | 6 | 0 | -2.324960 | -0.106959 | 0.351700  |
| 31 | 6 | 0 | -3.051846 | -1.171262 | -0.242270 |
| 32 | 6 | 0 | -4.541386 | -1.106188 | -0.477450 |
| 33 | 1 | 0 | -4.852200 | -0.111569 | -0.798350 |
| 34 | 1 | 0 | -5.088975 | -1.319230 | 0.443190  |
| 35 | 1 | 0 | -4.824053 | -1.833509 | -1.235750 |
| 36 | 8 | 0 | -0.180003 | 0.789829  | 1.058470  |
| 37 | 6 | 0 | -0.230388 | 2.011109  | 0.401770  |
| 38 | 6 | 0 | -1.429660 | 2.712314  | 0.345690  |
| 39 | 8 | 0 | -2.562099 | 2.281450  | 1.011720  |
| 40 | 6 | 0 | -3.081424 | 1.005758  | 0.993310  |
| 41 | 6 | 0 | 0.931580  | 2.527873  | -0.151810 |
| 42 | 1 | 0 | 1.858763  | 1.972777  | -0.113870 |
| 43 | 6 | 0 | 0.888236  | 3.782323  | -0.757620 |
| 44 | 8 | 0 | 2.058694  | 4.265617  | -1.272430 |
| 45 | 1 | 0 | 1.897931  | 5.123657  | -1.678270 |
| 46 | 6 | 0 | -0.314387 | 4.487378  | -0.822310 |
| 47 | 1 | 0 | -0.343071 | 5.463508  | -1.297710 |
| 48 | 6 | 0 | -1.486995 | 3.965744  | -0.272230 |
| 49 | 6 | 0 | -2.782928 | 4.732539  | -0.304740 |
| 50 | 1 | 0 | -3.553526 | 4.181076  | -0.850340 |
| 51 | 1 | 0 | -2.649172 | 5.703120  | -0.784490 |
| 52 | 1 | 0 | -3.168088 | 4.891018  | 0.705530  |
| 53 | 8 | 0 | -4.149233 | 0.859644  | 1.522470  |
| 54 | 8 | 0 | -0.388136 | -3.592152 | -0.832460 |
| 55 | 1 | 0 | 0.504274  | -3.617908 | -0.436970 |
| 56 | 8 | 0 | 4.401823  | -0.917834 | 1.172870  |

| Conformer IIIa-9 |               |             |                         |           |           |  |
|------------------|---------------|-------------|-------------------------|-----------|-----------|--|
| Center Number    | Atomic Number | Atomic Type | Coordinates (Angstroms) |           |           |  |
|                  |               |             | X                       | Y         | Z         |  |
| 1                | 6             | 0           | 0.435483                | 3.258198  | 0.495900  |  |
| 2                | 8             | 0           | 0.385676                | 4.547098  | 0.967600  |  |
| 3                | 6             | 0           | -0.476028               | 5.441893  | 0.251100  |  |
| 4                | 1             | 0           | -0.176929               | 5.512095  | -0.800400 |  |
| 5                | 1             | 0           | -0.359533               | 6.415594  | 0.726000  |  |
| 6                | 1             | 0           | -1.518127               | 5.124088  | 0.321200  |  |
| 7                | 6             | 0           | -0.646913               | 2.394693  | 0.750400  |  |
| 8                | 6             | 0           | -0.582306               | 1.037493  | 0.392200  |  |
| 9                | 6             | 0           | -1.805102               | 0.141587  | 0.549000  |  |
| 10               | 6             | 0           | -2.771803               | 0.343882  | -0.625300 |  |
| 11               | 1             | 0           | -3.081708               | 1.391281  | -0.658100 |  |
| 12               | 6             | 0           | -4.084199               | -0.473024 | -0.574200 |  |
| 13               | 8             | 0           | -5.047902               | 0.116271  | -1.423200 |  |
| 14               | 1             | 0           | -5.087699               | -0.436929 | -2.216500 |  |
| 15               | 1             | 0           | -4.464499               | -0.459826 | 0.450000  |  |
| 16               | 6             | 0           | -3.880692               | -1.920723 | -1.002500 |  |
| 17               | 8             | 0           | -3.248388               | -2.665020 | -0.082200 |  |
| 18               | 6             | 0           | -3.042181               | -4.051119 | -0.438300 |  |
| 19               | 1             | 0           | -2.379981               | -4.126216 | -1.301400 |  |
| 20               | 1             | 0           | -3.995979               | -4.522924 | -0.674100 |  |
| 21               | 1             | 0           | -2.590079               | -4.511517 | 0.436500  |  |
| 22               | 1             | 0           | -2.240402               | 0.140985  | -1.559500 |  |
| 23               | 8             | 0           | -2.548604               | 0.463083  | 1.748800  |  |
| 24               | 6             | 0           | -1.999401               | -0.075514 | 2.949500  |  |
| 25               | 1             | 0           | -0.964503               | 0.251491  | 3.101400  |  |
| 26               | 1             | 0           | -2.039695               | -1.169314 | 2.929400  |  |
| 27               | 1             | 0           | -2.616403               | 0.291383  | 3.769400  |  |
| 28               | 1             | 0           | -1.496197               | -0.901212 | 0.601300  |  |
| 29               | 6             | 0           | 0.587696                | 0.578199  | -0.221700 |  |
| 30               | 6             | 0           | 1.627792                | 1.448904  | -0.589700 |  |
| 31               | 6             | 0           | 1.556485                | 2.812803  | -0.198400 |  |
| 32               | 6             | 0           | 2.665580                | 3.799209  | -0.475200 |  |
| 33               | 1             | 0           | 2.606576                | 4.619509  | 0.237800  |  |
| 34               | 1             | 0           | 2.582178                | 4.203109  | -1.486400 |  |
| 35               | 1             | 0           | 3.647082                | 3.330414  | -0.407300 |  |
| 36               | 8             | 0           | 0.633703                | -0.775801 | -0.528600 |  |
| 37               | 6             | 0           | 1.776106                | -1.467395 | -0.123600 |  |
| 38               | 6             | 0           | 3.007704                | -1.150589 | -0.681400 |  |
| 39               | 8             | 0           | 3.138300                | -0.210289 | -1.676800 |  |
| 40               | 6             | 0           | 2.640493                | 1.075409  | -1.615000 |  |

|    |   |   |           |           |           |
|----|---|---|-----------|-----------|-----------|
| 41 | 6 | 0 | 1.674311  | -2.526596 | 0.787700  |
| 42 | 6 | 0 | 0.348713  | -2.912603 | 1.389600  |
| 43 | 1 | 0 | 0.418718  | -3.888302 | 1.872700  |
| 44 | 1 | 0 | -0.435087 | -2.954906 | 0.632300  |
| 45 | 1 | 0 | 0.033910  | -2.188204 | 2.145900  |
| 46 | 6 | 0 | 2.826515  | -3.235390 | 1.123100  |
| 47 | 1 | 0 | 2.775819  | -4.063991 | 1.818800  |
| 48 | 6 | 0 | 4.065113  | -2.900984 | 0.574500  |
| 49 | 8 | 0 | 5.143517  | -3.641279 | 0.961700  |
| 50 | 1 | 0 | 5.930515  | -3.324075 | 0.506900  |
| 51 | 6 | 0 | 4.158208  | -1.853084 | -0.335900 |
| 52 | 1 | 0 | 5.094907  | -1.575879 | -0.805800 |
| 53 | 8 | 0 | 3.046290  | 1.836511  | -2.449400 |
| 54 | 8 | 0 | -1.727516 | 2.929987  | 1.359900  |
| 55 | 1 | 0 | -2.317012 | 2.193984  | 1.622000  |
| 56 | 8 | 0 | -4.251990 | -2.343325 | -2.071900 |

Conformer IIIa-14

| Center<br>Number | Atomic<br>Number | Atomic<br>Type | Coordinates (Angstroms) |           |           |
|------------------|------------------|----------------|-------------------------|-----------|-----------|
|                  |                  |                | X                       | Y         | Z         |
| 1                | 6                | 0              | 0.685863                | 3.287587  | 0.346000  |
| 2                | 8                | 0              | 0.757290                | 4.604685  | 0.730200  |
| 3                | 6                | 0              | -0.038491               | 5.521102  | -0.032600 |
| 4                | 1                | 0              | 0.174929                | 6.511297  | 0.369100  |
| 5                | 1                | 0              | -1.102796               | 5.304024  | 0.078400  |
| 6                | 1                | 0              | 0.240008                | 5.491296  | -1.091800 |
| 7                | 6                | 0              | -0.461252               | 2.540310  | 0.676400  |
| 8                | 6                | 0              | -0.516881               | 1.162411  | 0.412300  |
| 9                | 6                | 0              | -1.793097               | 0.369338  | 0.658200  |
| 10               | 6                | 0              | -2.753495               | 0.487157  | -0.532200 |
| 11               | 1                | 0              | -3.074873               | 1.526364  | -0.641300 |
| 12               | 6                | 0              | -4.041212               | -0.359916 | -0.410600 |
| 13               | 8                | 0              | -5.009604               | 0.041604  | -1.360600 |
| 14               | 1                | 0              | -4.776812               | -0.362101 | -2.204200 |
| 15               | 1                | 0              | -4.476109               | -0.192407 | 0.575100  |
| 16               | 6                | 0              | -3.692043               | -1.841523 | -0.500700 |
| 17               | 8                | 0              | -3.908952               | -2.325219 | -1.738000 |
| 18               | 6                | 0              | -3.556281               | -3.707426 | -1.956700 |
| 19               | 1                | 0              | -3.876786               | -3.932019 | -2.970900 |
| 20               | 1                | 0              | -4.069494               | -4.344915 | -1.236900 |
| 21               | 1                | 0              | -2.478484               | -3.840448 | -1.855900 |
| 22               | 1                | 0              | -2.216000               | 0.215646  | -1.446000 |
| 23               | 8                | 0              | -2.515587               | 0.856253  | 1.813300  |
| 24               | 6                | 0              | -2.044598               | 0.342043  | 3.059700  |

|    |   |   |           |           |           |
|----|---|---|-----------|-----------|-----------|
| 25 | 1 | 0 | -2.637988 | 0.818455  | 3.839600  |
| 26 | 1 | 0 | -0.985793 | 0.577821  | 3.216100  |
| 27 | 1 | 0 | -2.192620 | -0.741154 | 3.100900  |
| 28 | 1 | 0 | -1.545219 | -0.677167 | 0.824000  |
| 29 | 6 | 0 | 0.593107  | 0.563789  | -0.192700 |
| 30 | 6 | 0 | 1.694922  | 1.314366  | -0.637600 |
| 31 | 6 | 0 | 1.749251  | 2.702065  | -0.334500 |
| 32 | 6 | 0 | 2.932969  | 3.568341  | -0.691800 |
| 33 | 1 | 0 | 2.850376  | 3.935942  | -1.717100 |
| 34 | 1 | 0 | 3.869157  | 3.013921  | -0.634500 |
| 35 | 1 | 0 | 2.974686  | 4.421340  | -0.016500 |
| 36 | 8 | 0 | 0.505679  | -0.803810 | -0.413500 |
| 37 | 6 | 0 | 1.591563  | -1.577532 | 0.001200  |
| 38 | 6 | 0 | 2.824966  | -1.408857 | -0.612900 |
| 39 | 8 | 0 | 3.002784  | -0.541061 | -1.667100 |
| 40 | 6 | 0 | 2.640712  | 0.790047  | -1.660200 |
| 41 | 6 | 0 | 1.424643  | -2.565828 | 0.981600  |
| 42 | 6 | 0 | 0.097338  | -2.789701 | 1.657600  |
| 43 | 1 | 0 | -0.144845 | -1.959296 | 2.326900  |
| 44 | 1 | 0 | 0.126819  | -3.699302 | 2.259100  |
| 45 | 1 | 0 | -0.723064 | -2.880684 | 0.944400  |
| 46 | 6 | 0 | 2.521626  | -3.356751 | 1.320700  |
| 47 | 1 | 0 | 2.423010  | -4.132649 | 2.069900  |
| 48 | 6 | 0 | 3.763830  | -3.173377 | 0.712400  |
| 49 | 8 | 0 | 4.784413  | -3.987498 | 1.110400  |
| 50 | 1 | 0 | 5.580918  | -3.767214 | 0.616600  |
| 51 | 6 | 0 | 3.919550  | -2.193480 | -0.262800 |
| 52 | 1 | 0 | 4.859854  | -2.031599 | -0.777400 |
| 53 | 8 | 0 | 3.097325  | 1.463737  | -2.543100 |
| 54 | 8 | 0 | -1.480839 | 3.203631  | 1.264300  |
| 55 | 1 | 0 | -2.125253 | 2.535945  | 1.578100  |
| 56 | 8 | 0 | -3.223956 | -2.491833 | 0.402800  |

Conformer **IIIa-26**

| Center<br>Number | Atomic<br>Number | Atomic<br>Type | Coordinates (Angstroms) |          |           |
|------------------|------------------|----------------|-------------------------|----------|-----------|
|                  |                  |                | X                       | Y        | Z         |
| 1                | 6                | 0              | -0.832814               | 2.979488 | 0.501404  |
| 2                | 8                | 0              | -1.357816               | 4.196287 | 0.864704  |
| 3                | 6                | 0              | -2.666616               | 4.486485 | 0.358504  |
| 4                | 1                | 0              | -3.405215               | 3.786984 | 0.755404  |
| 5                | 1                | 0              | -2.676316               | 4.457985 | -0.736796 |
| 6                | 1                | 0              | -2.902918               | 5.495385 | 0.695604  |
| 7                | 6                | 0              | -1.319113               | 1.812787 | 1.119304  |
| 8                | 6                | 0              | -0.729211               | 0.562188 | 0.862304  |

|    |   |   |           |           |           |
|----|---|---|-----------|-----------|-----------|
| 9  | 6 | 0 | -1.300709 | -0.695813 | 1.505604  |
| 10 | 6 | 0 | -2.513008 | -1.261814 | 0.748404  |
| 11 | 1 | 0 | -3.060508 | -1.909015 | 1.439604  |
| 12 | 6 | 0 | -2.088107 | -2.109714 | -0.462696 |
| 13 | 8 | 0 | -1.356106 | -3.244713 | -0.041296 |
| 14 | 1 | 0 | -1.907705 | -4.013414 | -0.251096 |
| 15 | 1 | 0 | -1.463208 | -1.512813 | -1.135096 |
| 16 | 6 | 0 | -3.307207 | -2.571916 | -1.251096 |
| 17 | 8 | 0 | -3.973708 | -1.558516 | -1.809496 |
| 18 | 6 | 0 | -5.145608 | -1.914018 | -2.574996 |
| 19 | 1 | 0 | -4.872907 | -2.582218 | -3.392196 |
| 20 | 1 | 0 | -5.535009 | -0.974419 | -2.958196 |
| 21 | 1 | 0 | -5.879707 | -2.405619 | -1.935796 |
| 22 | 1 | 0 | -3.176710 | -0.454515 | 0.430504  |
| 23 | 8 | 0 | -1.765610 | -0.427913 | 2.851104  |
| 24 | 6 | 0 | -0.725410 | -0.320412 | 3.822604  |
| 25 | 1 | 0 | -1.204910 | -0.066013 | 4.767404  |
| 26 | 1 | 0 | -0.003911 | 0.460789  | 3.559404  |
| 27 | 1 | 0 | -0.203408 | -1.276911 | 3.930104  |
| 28 | 1 | 0 | -0.536908 | -1.469712 | 1.554804  |
| 29 | 6 | 0 | 0.338489  | 0.517589  | -0.040396 |
| 30 | 6 | 0 | 0.780788  | 1.658590  | -0.728696 |
| 31 | 6 | 0 | 0.195986  | 2.917889  | -0.434696 |
| 32 | 6 | 0 | 0.662784  | 4.204190  | -1.072396 |
| 33 | 1 | 0 | 1.741084  | 4.205891  | -1.231196 |
| 34 | 1 | 0 | 0.389883  | 5.044490  | -0.436696 |
| 35 | 1 | 0 | 0.203684  | 4.340089  | -2.054096 |
| 36 | 8 | 0 | 0.873191  | -0.735410 | -0.309096 |
| 37 | 6 | 0 | 2.252591  | -0.884408 | -0.162296 |
| 38 | 6 | 0 | 3.119590  | -0.145507 | -0.958696 |
| 39 | 8 | 0 | 2.681389  | 0.656993  | -1.988796 |
| 40 | 6 | 0 | 1.646288  | 1.561991  | -1.935696 |
| 41 | 6 | 0 | 2.761692  | -1.843607 | 0.724104  |
| 42 | 6 | 0 | 1.846694  | -2.728909 | 1.531004  |
| 43 | 1 | 0 | 1.474493  | -2.203709 | 2.416404  |
| 44 | 1 | 0 | 2.386695  | -3.610808 | 1.879104  |
| 45 | 1 | 0 | 0.983894  | -3.054610 | 0.947804  |
| 46 | 6 | 0 | 4.144393  | -1.993205 | 0.823304  |
| 47 | 1 | 0 | 4.566194  | -2.731405 | 1.494504  |
| 48 | 6 | 0 | 5.012691  | -1.213004 | 0.060204  |
| 49 | 8 | 0 | 6.352492  | -1.413602 | 0.228504  |
| 50 | 1 | 0 | 6.839191  | -0.836702 | -0.368996 |
| 51 | 6 | 0 | 4.499090  | -0.289505 | -0.844796 |

---

|    |   |   |           |           |           |
|----|---|---|-----------|-----------|-----------|
| 52 | 1 | 0 | 5.136289  | 0.301496  | -1.492796 |
| 53 | 8 | 0 | 1.492987  | 2.243891  | -2.912296 |
| 54 | 8 | 0 | -2.356813 | 1.957886  | 1.973304  |
| 55 | 1 | 0 | -2.440512 | 1.122286  | 2.478704  |
| 56 | 8 | 0 | -3.621405 | -3.736116 | -1.343896 |

Conformer IIIb-3

| Center<br>Number | Atomic<br>Number | Atomic<br>Type | Coordinates (Angstroms) |           |           |
|------------------|------------------|----------------|-------------------------|-----------|-----------|
|                  |                  |                | X                       | Y         | Z         |
| 1                | 6                | 0              | 0.201324                | 3.162592  | 0.540205  |
| 2                | 8                | 0              | -0.006165               | 4.441794  | 0.997805  |
| 3                | 6                | 0              | -1.059858               | 5.169103  | 0.354505  |
| 4                | 1                | 0              | -1.050750               | 6.165803  | 0.794905  |
| 5                | 1                | 0              | -2.028962               | 4.699411  | 0.535805  |
| 6                | 1                | 0              | -0.878958               | 5.247001  | -0.723395 |
| 7                | 6                | 0              | -0.697784               | 2.147900  | 0.920605  |
| 8                | 6                | 0              | -0.450496               | 0.808998  | 0.577505  |
| 9                | 6                | 0              | -1.442505               | -0.290894 | 0.927005  |
| 10               | 6                | 0              | -2.508707               | -0.464985 | -0.157795 |
| 11               | 1                | 0              | -3.107399               | 0.445920  | -0.243295 |
| 12               | 6                | 0              | -3.424617               | -1.666377 | 0.136905  |
| 13               | 8                | 0              | -2.676228               | -2.860683 | 0.266805  |
| 14               | 1                | 0              | -2.898632               | -3.402081 | -0.505595 |
| 15               | 1                | 0              | -3.955716               | -1.477372 | 1.075005  |
| 16               | 6                | 0              | -4.454019               | -1.842168 | -0.969895 |
| 17               | 8                | 0              | -5.312910               | -0.821461 | -1.042795 |
| 18               | 6                | 0              | -6.305311               | -0.901252 | -2.089095 |
| 19               | 1                | 0              | -6.917618               | -1.794147 | -1.960395 |
| 20               | 1                | 0              | -5.822311               | -0.932356 | -3.066195 |
| 21               | 1                | 0              | -6.906803               | -0.001947 | -1.984695 |
| 22               | 1                | 0              | -1.996908               | -0.627489 | -1.110495 |
| 23               | 8                | 0              | -2.141503               | -0.011788 | 2.162805  |
| 24               | 6                | 0              | -1.413206               | -0.367894 | 3.338205  |
| 25               | 1                | 0              | -0.444402               | 0.142197  | 3.380105  |
| 26               | 1                | 0              | -1.259815               | -1.450996 | 3.376205  |
| 27               | 1                | 0              | -2.019703               | -0.060089 | 4.189605  |
| 28               | 1                | 0              | -0.916614               | -1.236498 | 1.036205  |
| 29               | 6                | 0              | 0.692402                | 0.525188  | -0.177995 |
| 30               | 6                | 0              | 1.546010                | 1.534880  | -0.647595 |
| 31               | 6                | 0              | 1.306222                | 2.879282  | -0.257295 |
| 32               | 6                | 0              | 2.219332                | 4.016575  | -0.647295 |
| 33               | 1                | 0              | 1.973435                | 4.388077  | -1.644595 |
| 34               | 1                | 0              | 3.261729                | 3.700866  | -0.682095 |
| 35               | 1                | 0              | 2.111539                | 4.830475  | 0.067505  |



|    |   |   |           |           |           |
|----|---|---|-----------|-----------|-----------|
| 36 | 8 | 0 | 0.882590  | -0.806114 | -0.524995 |
| 37 | 6 | 0 | 2.128385  | -1.364525 | -0.239595 |
| 38 | 6 | 0 | 3.272690  | -0.861135 | -0.855295 |
| 39 | 8 | 0 | 3.214598  | 0.111766  | -1.828295 |
| 40 | 6 | 0 | 2.514308  | 1.294072  | -1.752095 |
| 41 | 6 | 0 | 2.219076  | -2.481325 | 0.596605  |
| 42 | 6 | 0 | 0.997770  | -3.099415 | 1.228105  |
| 43 | 1 | 0 | 0.149570  | -3.124608 | 0.543305  |
| 44 | 1 | 0 | 0.686675  | -2.539012 | 2.115305  |
| 45 | 1 | 0 | 1.210662  | -4.121217 | 1.547105  |
| 46 | 6 | 0 | 3.479671  | -3.040936 | 0.823805  |
| 47 | 1 | 0 | 3.559263  | -3.913937 | 1.465305  |
| 48 | 6 | 0 | 4.627075  | -2.506346 | 0.239005  |
| 49 | 8 | 0 | 5.873071  | -3.022557 | 0.448905  |
| 50 | 1 | 0 | 5.808565  | -3.774956 | 1.045805  |
| 51 | 6 | 0 | 4.523585  | -1.411845 | -0.614295 |
| 52 | 1 | 0 | 5.394888  | -1.009553 | -1.112695 |
| 53 | 8 | 0 | 2.719215  | 2.085970  | -2.630995 |
| 54 | 8 | 0 | -1.782081 | 2.524909  | 1.635005  |
| 55 | 1 | 0 | -2.214688 | 1.709813  | 1.962905  |
| 56 | 8 | 0 | -4.466227 | -2.804368 | -1.702595 |

Conformer **IIIb**-15

| Center<br>Number | Atomic<br>Number | Atomic<br>Type | Coordinates (Angstroms) |           |           |
|------------------|------------------|----------------|-------------------------|-----------|-----------|
|                  |                  |                | X                       | Y         | Z         |
| 1                | 6                | 0              | 0.194607                | 3.159899  | 0.538705  |
| 2                | 8                | 0              | -0.015990               | 4.439100  | 0.994805  |
| 3                | 6                | 0              | -1.072188               | 5.163002  | 0.351505  |
| 4                | 1                | 0              | -2.039689               | 4.690204  | 0.533105  |
| 5                | 1                | 0              | -0.891588               | 5.241302  | -0.726395 |
| 6                | 1                | 0              | -1.066086               | 6.159802  | 0.791905  |
| 7                | 6                | 0              | -0.702895               | 2.143601  | 0.918605  |
| 8                | 6                | 0              | -0.452498               | 0.804901  | 0.576605  |
| 9                | 6                | 0              | -1.444301               | -0.295697 | 0.924705  |
| 10               | 6                | 0              | -2.510502               | -0.467594 | -0.160695 |
| 11               | 1                | 0              | -3.107699               | 0.444407  | -0.246195 |
| 12               | 6                | 0              | -3.428604               | -1.667592 | 0.133505  |
| 13               | 8                | 0              | -2.682307               | -2.862794 | 0.263805  |
| 14               | 1                | 0              | -2.902609               | -3.403293 | -0.509895 |
| 15               | 1                | 0              | -3.959804               | -1.477591 | 1.071305  |
| 16               | 6                | 0              | -4.457905               | -1.840790 | -0.973895 |
| 17               | 8                | 0              | -5.316402               | -0.819488 | -1.044695 |
| 18               | 6                | 0              | -6.309103               | -0.897085 | -2.090795 |
| 19               | 1                | 0              | -6.921705               | -1.790084 | -1.963395 |

|    |   |   |           |           |           |
|----|---|---|-----------|-----------|-----------|
| 20 | 1 | 0 | -5.826503 | -0.926786 | -3.068095 |
| 21 | 1 | 0 | -6.910300 | 0.002216  | -1.984695 |
| 22 | 1 | 0 | -1.998702 | -0.630896 | -1.113295 |
| 23 | 8 | 0 | -2.143500 | -0.017195 | 2.160505  |
| 24 | 6 | 0 | -1.417601 | -0.378497 | 3.336205  |
| 25 | 1 | 0 | -0.447400 | 0.128601  | 3.380505  |
| 26 | 1 | 0 | -1.267604 | -1.462097 | 3.371605  |
| 27 | 1 | 0 | -2.024401 | -0.070896 | 4.187505  |
| 28 | 1 | 0 | -0.918803 | -1.241598 | 1.032605  |
| 29 | 6 | 0 | 0.692901  | 0.522098  | -0.175395 |
| 30 | 6 | 0 | 1.545703  | 1.533496  | -0.644595 |
| 31 | 6 | 0 | 1.301606  | 2.878096  | -0.256195 |
| 32 | 6 | 0 | 2.213009  | 4.017594  | -0.644195 |
| 33 | 1 | 0 | 2.100411  | 4.831595  | 0.069805  |
| 34 | 1 | 0 | 1.969310  | 4.387995  | -1.642495 |
| 35 | 1 | 0 | 3.256408  | 3.704892  | -0.675395 |
| 36 | 8 | 0 | 0.885698  | -0.809103 | -0.518495 |
| 37 | 6 | 0 | 2.132896  | -1.365006 | -0.233295 |
| 38 | 6 | 0 | 3.272098  | -0.862308 | -0.850095 |
| 39 | 8 | 0 | 3.218400  | 0.111492  | -1.822195 |
| 40 | 6 | 0 | 2.518403  | 1.295394  | -1.744995 |
| 41 | 6 | 0 | 2.227194  | -2.483106 | 0.607005  |
| 42 | 6 | 0 | 1.005492  | -3.097303 | 1.241205  |
| 43 | 1 | 0 | 0.686194  | -2.522802 | 2.116405  |
| 44 | 1 | 0 | 1.223990  | -4.111403 | 1.579005  |
| 45 | 1 | 0 | 0.161492  | -3.138801 | 0.551705  |
| 46 | 6 | 0 | 3.483792  | -3.042909 | 0.834005  |
| 47 | 1 | 0 | 3.586290  | -3.911709 | 1.472705  |
| 48 | 6 | 0 | 4.630394  | -2.509912 | 0.245305  |
| 49 | 8 | 0 | 5.822092  | -3.111314 | 0.530705  |
| 50 | 1 | 0 | 6.528193  | -2.664116 | 0.053105  |
| 51 | 6 | 0 | 4.525296  | -1.416811 | -0.608795 |
| 52 | 1 | 0 | 5.384097  | -0.997313 | -1.120395 |
| 53 | 8 | 0 | 2.730905  | 2.089193  | -2.620595 |
| 54 | 8 | 0 | -1.788594 | 2.518404  | 1.631305  |
| 55 | 1 | 0 | -2.218596 | 1.702305  | 1.960905  |
| 56 | 8 | 0 | -4.470507 | -2.801390 | -1.708695 |

---

**Table S4.** Experimental (**1** and **2**) and computed (a and b) <sup>13</sup>C-NMR chemical shifts.

| Position            | <b>1</b> | <b>Ia</b> | <b>Ib</b> | <b>2</b> | <b>Ia</b> | <b>Ib</b> |
|---------------------|----------|-----------|-----------|----------|-----------|-----------|
| 1                   | 113.6    | 116.4     | 116.3     | 113.7    | 116.3     | 116.2     |
| 2                   | 156.2    | 153.7     | 153.6     | 156.2    | 153.8     | 153.7     |
| 3                   | 113.8    | 114.1     | 114.0     | 113.7    | 114.0     | 113.9     |
| 4                   | 154.2    | 148.1     | 147.8     | 154.2    | 148.1     | 147.9     |
| 5                   | 144.5    | 142.1     | 142.2     | 144.6    | 142.1     | 142.2     |
| 6                   | 137.2    | 130.3     | 130.5     | 137.3    | 130.3     | 130.4     |
| 7                   | 163.8    | 163.2     | 163.3     | 163.7    | 163.3     | 163.3     |
| 8                   | 75.9     | 78.9      | 80.1      | 75.4     | 78.7      | 79.9      |
| 9                   | 40.2     | 40.3      | 42.3      | 38.7     | 40.0      | 42.0      |
| 10                  | 67.3     | 69.3      | 68.4      | 67.4     | 69.0      | 68.2      |
| 11                  | 175.4    | 179.0     | 179.0     | 175.6    | 179.1     | 179.1     |
| 12                  | 14.4     | 16.4      | 15.6      | 14.4     | 16.0      | 15.3      |
| 1'                  | 153.3    | 153.1     | 152.9     | 153.1    | 153.1     | 152.9     |
| 2'                  | 143.4    | 138.3     | 138.4     | 143.5    | 138.3     | 138.4     |
| 3'                  | 131.0    | 134.2     | 134.4     | 131.0    | 134.2     | 134.4     |
| 4'                  | 114.5    | 116.0     | 115.9     | 114.5    | 116.0     | 115.8     |
| 5'                  | 144.6    | 157.6     | 157.5     | 144.7    | 157.6     | 157.6     |
| 6'                  | 106.0    | 101.3     | 101.0     | 106.0    | 101.2     | 100.9     |
| 7'                  | 18.2     | 19.9      | 19.3      | 18.1     | 19.6      | 19.0      |
| 8-OCH <sub>3</sub>  | 58.1     | 58.0      | 58.0      | 57.9     | 57.8      | 57.8      |
| 11-OCH <sub>3</sub> | 60.4     | 54.2      | 54.1      | 60.4     | 54.0      | 53.9      |
| 5'-OCH <sub>3</sub> | 52.9     | 54.8      | 54.4      | 52.8     | 54.5      | 54.2      |

| Position | <b>1</b> | <b>IIa</b> | <b>IIb</b> | <b>2</b> | <b>IIa</b> | <b>IIb</b> |
|----------|----------|------------|------------|----------|------------|------------|
| 1        | 113.6    | 114.2      | 113.7      | 113.7    | 114.1      | 113.6      |
| 2        | 156.2    | 155.3      | 155.0      | 156.2    | 155.3      | 155.1      |
| 3        | 113.8    | 114.5      | 113.0      | 113.7    | 114.4      | 112.9      |
| 4        | 154.2    | 155.3      | 155.2      | 154.2    | 155.4      | 155.3      |
| 5        | 144.5    | 142.9      | 143.3      | 144.6    | 142.9      | 143.3      |
| 6        | 137.2    | 139.3      | 140.9      | 137.3    | 139.3      | 140.9      |
| 7        | 163.8    | 161.7      | 161.3      | 163.7    | 161.8      | 161.3      |
| 8        | 75.9     | 75.3       | 80.0       | 75.4     | 75.1       | 79.9       |
| 9        | 40.2     | 40.5       | 38.5       | 38.7     | 40.2       | 38.2       |
| 10       | 67.3     | 68.5       | 71.9       | 67.4     | 68.3       | 71.7       |
| 11       | 175.4    | 176.7      | 175.8      | 175.6    | 176.8      | 175.9      |
| 12       | 14.4     | 16.3       | 15.5       | 14.4     | 15.9       | 15.1       |
| 1'       | 144.6    | 150.9      | 150.6      | 144.7    | 150.9      | 150.6      |
| 2'       | 143.4    | 136.9      | 136.7      | 143.5    | 136.9      | 136.7      |
| 3'       | 131.0    | 133.0      | 133.2      | 131.0    | 133.0      | 133.2      |
| 4'       | 114.5    | 112.2      | 112.1      | 114.5    | 112.1      | 112.0      |

|                     |       |       |       |       |       |       |
|---------------------|-------|-------|-------|-------|-------|-------|
| 5'                  | 153.3 | 153.1 | 152.8 | 153.1 | 153.2 | 152.9 |
| 6'                  | 106.0 | 105.2 | 104.2 | 106.0 | 105.1 | 104.1 |
| 7'                  | 18.2  | 19.4  | 18.9  | 18.1  | 19.1  | 18.6  |
| 5-OCH <sub>3</sub>  | 52.9  | 57.7  | 57.7  | 52.8  | 57.5  | 57.5  |
| 8-OCH <sub>3</sub>  | 58.1  | 56.7  | 56.6  | 57.9  | 56.5  | 56.3  |
| 11-OCH <sub>3</sub> | 60.4  | 53.4  | 52.4  | 60.4  | 53.2  | 52.1  |

| Position            | <b>1</b> | <b>IIIa</b> | <b>IIIb</b> | <b>2</b> | <b>IIIa</b> | <b>IIIb</b> |
|---------------------|----------|-------------|-------------|----------|-------------|-------------|
| 1                   | 113.8    | 113.32      | 113.1       | 113.7    | 113.24      | 113.02      |
| 2                   | 156.2    | 157.69      | 156.76      | 156.2    | 157.73      | 156.8       |
| 3                   | 113.8    | 112.23      | 112.74      | 113.7    | 112.15      | 112.66      |
| 4                   | 154.2    | 155.87      | 155.91      | 154.2    | 155.91      | 155.95      |
| 5                   | 144.5    | 142.66      | 142.43      | 144.6    | 142.66      | 142.43      |
| 6                   | 137.2    | 141.61      | 141.34      | 137.3    | 141.61      | 141.34      |
| 7                   | 163.8    | 161.45      | 161.43      | 163.7    | 161.5       | 161.48      |
| 8                   | 75.9     | 77.36       | 77.49       | 75.4     | 77.18       | 77.31       |
| 9                   | 40.2     | 44.28       | 42.09       | 38.7     | 44.01       | 41.81       |
| 10                  | 67.3     | 67.06       | 67.19       | 67.4     | 66.85       | 66.98       |
| 11                  | 175.4    | 176.48      | 177.03      | 175.6    | 176.57      | 177.12      |
| 12                  | 14.4     | 15.72       | 15.79       | 14.4     | 15.37       | 15.44       |
| 1'                  | 143.4    | 142.55      | 142.79      | 143.5    | 142.55      | 142.8       |
| 2'                  | 144.6    | 144.66      | 145.19      | 144.7    | 144.67      | 145.2       |
| 3'                  | 106.0    | 102.64      | 103.67      | 106.0    | 102.53      | 103.56      |
| 4'                  | 153.3    | 152.96      | 153         | 153.1    | 152.99      | 153.03      |
| 5'                  | 114.5    | 112.26      | 111.75      | 114.5    | 112.17      | 111.67      |
| 6'                  | 131.0    | 133.17      | 132.66      | 131.0    | 133.15      | 132.63      |
| 7'                  | 18.2     | 19.5        | 19.93       | 18.1     | 19.16       | 19.59       |
| 5-OCH <sub>3</sub>  | 52.9     | 57.44       | 57.56       | 52.8     | 57.21       | 57.32       |
| 8-OCH <sub>3</sub>  | 58.1     | 55.19       | 56.15       | 57.9     | 54.95       | 55.91       |
| 11-OCH <sub>3</sub> | 60.4     | 52.99       | 53.1        | 60.4     | 52.74       | 52.85       |

**Table S5.** Experimental (**1** and **2**) and computed (a and b) <sup>1</sup>H-NMR chemical shifts.

| Position           | <b>1</b> | <b>Ia</b> | <b>Ib</b> | <b>2</b> | <b>Ia</b> | <b>Ib</b> |
|--------------------|----------|-----------|-----------|----------|-----------|-----------|
| 8                  | 5.65     | 5.58      | 5.48      | 5.65     | 5.55      | 5.45      |
| 9a                 | 1.93     | 2.43      | 2.34      | 2.25     | 2.48      | 2.39      |
| 9b                 | 2.41     | 2.43      | 2.04      | 2.45     | 2.47      | 2.09      |
| 10                 | 4.53     | 4.42      | 4.60      | 4.36     | 4.41      | 4.59      |
| 12                 | 2.38     | 2.37      | 2.47      | 2.39     | 2.41      | 2.51      |
| 4'                 | 6.47     | 6.64      | 6.59      | 6.47     | 6.59      | 6.53      |
| 6'                 | 6.65     | 6.67      | 6.61      | 6.63     | 6.61      | 6.54      |
| 7'                 | 2.46     | 2.31      | 2.42      | 2.47     | 2.35      | 2.46      |
| 8-OCH <sub>3</sub> | 3.54     | 3.28      | 3.53      | 3.40     | 3.31      | 3.55      |

|                     |      |      |      |      |      |      |
|---------------------|------|------|------|------|------|------|
| 11-OCH <sub>3</sub> | 3.79 | 3.75 | 3.76 | 3.79 | 3.76 | 3.77 |
| 5'-OCH <sub>3</sub> | 3.78 | 3.71 | 3.76 | 3.81 | 3.72 | 3.78 |
| 4-OH                | 9.07 | 9.17 | 9.09 | 9.27 | 9.34 | 9.28 |

| Position            | <b>1</b> | <b>IIa</b> | <b>IIb</b> | <b>2</b> | <b>IIa</b> | <b>IIb</b> |
|---------------------|----------|------------|------------|----------|------------|------------|
| 8                   | 5.65     | 5.51       | 5.53       | 5.65     | 5.48       | 5.49       |
| 9a                  | 1.93     | 2.15       | 2.01       | 2.25     | 2.20       | 2.08       |
| 9b                  | 2.41     | 2.60       | 2.53       | 2.45     | 2.65       | 2.58       |
| 10                  | 4.53     | 4.39       | 4.43       | 4.36     | 4.39       | 4.43       |
| 12                  | 2.38     | 2.43       | 2.43       | 2.39     | 2.48       | 2.48       |
| 4'                  | 6.47     | 6.39       | 6.57       | 6.47     | 6.34       | 6.51       |
| 6'                  | 6.65     | 6.94       | 6.67       | 6.63     | 6.87       | 6.60       |
| 7'                  | 2.46     | 2.35       | 2.28       | 2.47     | 2.40       | 2.34       |
| 5-OCH <sub>3</sub>  | 3.78     | 3.78       | 3.83       | 3.81     | 3.79       | 3.84       |
| 8-OCH <sub>3</sub>  | 3.54     | 3.29       | 3.48       | 3.40     | 3.32       | 3.50       |
| 11-OCH <sub>3</sub> | 3.79     | 3.75       | 3.83       | 3.79     | 3.76       | 3.84       |
| 4-OH                | 9.07     | 9.17       | 9.09       | 9.27     | 9.34       | 9.28       |

| Position            | <b>II</b> | <b>3a</b> | <b>3b</b> | <b>I</b> | <b>3a</b> | <b>3b</b> |
|---------------------|-----------|-----------|-----------|----------|-----------|-----------|
| 8                   | 5.65      | 5.66      | 5.74      | 5.65     | 5.61      | 5.68      |
| 9a                  | 1.93      | 2.18      | 1.78      | 2.25     | 2.24      | 1.87      |
| 9b                  | 2.41      | 2.15      | 2.27      | 2.45     | 2.21      | 2.33      |
| 10                  | 4.53      | 4.35      | 4.63      | 4.36     | 4.34      | 4.61      |
| 12                  | 2.38      | 2.46      | 2.48      | 2.39     | 2.51      | 2.53      |
| 3'                  | 6.65      | 6.41      | 6.46      | 6.63     | 6.34      | 6.38      |
| 5'                  | 6.47      | 6.66      | 6.47      | 6.47     | 6.57      | 6.39      |
| 7'                  | 2.46      | 2.64      | 2.62      | 2.47     | 2.69      | 2.68      |
| 5-OCH <sub>3</sub>  | 3.78      | 3.84      | 3.84      | 3.81     | 3.85      | 3.85      |
| 8-OCH <sub>3</sub>  | 3.54      | 3.46      | 3.55      | 3.40     | 3.48      | 3.57      |
| 11-OCH <sub>3</sub> | 3.79      | 3.71      | 3.73      | 3.79     | 3.72      | 3.75      |
| 4-OH                | 9.27      | 9.34      | 9.28      | 9.07     | 9.17      | 9.09      |

**Table S6.** Statistics of Ordinary Least Squares Linear Regression (OLS-LR) of experimental and computed <sup>13</sup>C- and <sup>1</sup>H-NMR chemical shifts.

| Type | Experimental | Compound    | CMAD <sup>a</sup> | CLAD <sup>b</sup> | R <sup>2</sup> | RMSE | F       | p value |
|------|--------------|-------------|-------------------|-------------------|----------------|------|---------|---------|
| C    | <b>2</b>     | <b>Ia</b>   | 3.2               | 12.9              | 0.9920         | 4.6  | 2482.05 | <0.01   |
| C    | <b>2</b>     | <b>Ib</b>   | 3.2               | 12.9              | 0.9917         | 4.6  | 2399.26 | <0.01   |
| C    | <b>2</b>     | <b>IIa</b>  | 2.1               | 7.2               | 0.9963         | 3.1  | 5439.24 | <0.01   |
| C    | <b>2</b>     | <b>IIb</b>  | 2.5               | 8.3               | 0.9951         | 3.6  | 4095.03 | <0.01   |
| C    | <b>2</b>     | <b>IIIa</b> | <b>2.2</b>        | <b>7.7</b>        | <b>0.9965</b>  | 3.0  | 5744.66 | <0.01   |
| C    | <b>2</b>     | <b>IIIb</b> | <b>2.0</b>        | <b>7.6</b>        | <b>0.9971</b>  | 2.7  | 6931.61 | <0.01   |
| C    | <b>1</b>     | <b>Ia</b>   | 3.2               | 13.0              | 0.9921         | 4.5  | 2497.03 | <0.01   |

|   |   |      |             |             |               |      |         |       |
|---|---|------|-------------|-------------|---------------|------|---------|-------|
| C | 1 | Ib   | 3.2         | 12.9        | 0.9919        | 4.6  | 2454.72 | <0.01 |
| C | 1 | IIa  | 2.1         | 7.0         | 0.9964        | 3.1  | 5462.78 | <0.01 |
| C | 1 | IIb  | 2.6         | 8.0         | 0.9951        | 3.6  | 4061.24 | <0.01 |
| C | 1 | IIIa | <b>2.1</b>  | <b>7.4</b>  | <b>0.9968</b> | 2.9  | 6199.11 | <0.01 |
| C | 2 | IIIb | <b>2.0</b>  | <b>7.3</b>  | <b>0.9973</b> | 2.7  | 7277.87 | <0.01 |
| H | 2 | Ia   | 0.08        | 0.23        | 0.9959        | 0.11 | 2162.44 | <0.01 |
| H | 2 | Ib   | 0.13        | 0.36        | 0.9892        | 0.18 | 821.91  | <0.01 |
| H | 2 | IIa  | 0.10        | 0.24        | 0.9938        | 0.14 | 1432.35 | <0.01 |
| H | 2 | IIb  | 0.09        | 0.17        | 0.9956        | 0.11 | 2051.67 | <0.01 |
| H | 2 | IIIa | <b>0.11</b> | <b>0.29</b> | <b>0.9952</b> | 0.16 | 2079.63 | <0.01 |
| H | 2 | IIIb | <b>0.15</b> | <b>0.38</b> | <b>0.9923</b> | 0.20 | 1283.78 | <0.01 |
| H | 1 | Ia   | 0.13        | 0.50        | 0.9859        | 0.21 | 629.48  | <0.01 |
| H | 1 | Ib   | 0.13        | 0.41        | 0.9869        | 0.20 | 675.50  | <0.01 |
| H | 1 | IIa  | 0.14        | 0.29        | 0.9898        | 0.18 | 869.99  | <0.01 |
| H | 1 | IIb  | 0.08        | 0.18        | 0.9966        | 0.10 | 2599.94 | <0.01 |
| H | 1 | IIIa | <b>0.14</b> | <b>0.26</b> | <b>0.9942</b> | 0.18 | 1708.42 | <0.01 |
| H | 1 | IIIb | <b>0.09</b> | <b>0.19</b> | <b>0.9975</b> | 0.12 | 3932.50 | <0.01 |

<sup>a</sup> CMAD = corrected mean absolute deviation, computed as  $(1/n) \sum_i^n |\delta_{\text{calc}} - \delta_{\text{exp}}|$ , where  $\delta_{\text{calc}}$  and

$\delta_{\text{exp}}$  refer to the calculated and experimental chemical shifts. <sup>b</sup> CLAD = corrected largest absolute

deviation, computed as  $\max(|\delta_{\text{calc}} - \delta_{\text{exp}}|)$ .
